# Supplementary material for: UPLC-MS-Based Serum Metabolomics Reveals Potential Biomarkers of Ang II-Induced Hypertension in Mice
Source: Front Cardiovasc Med. 2021 May 5;8:683859. doi: 10.3389/fcvm.2021.683859 (PMC8131677; doi:10.3389/fcvm.2021.683859)
Supplement: Supplementary file 1 [file Data_Sheet_1.xlsx]

## Sheet: Sheet1
Compound.ID	ratio	t.test_p.value	wilcox.test_p.value	wilcox.test_p.value_BHcorrect	VIP	sample	ID	KEGG.ID	Formula	Adducts	Score	Fragmentation.Score	Mass.Error..ppm.	Isotope.Similarity	Description	m.z	Neutral.mass..Da.	Retention.time..min.	Charge	Pathway	label
0.48_136.0324m/z	0.732173	0.0390986	0.105122	0.848087	2.05065	CaseC:Control	NA	NULL	NA	NA	NA	NA	NA	NA	NA	NA	NA	NA	NA	NULL	down
0.48_209.9339m/z	0.781095	0.00211954	4.33e-05	0.0654413	2.11234	CaseC:Control	NA	NULL	NA	NA	NA	NA	NA	NA	NA	NA	NA	NA	NA	NULL	down
0.50_317.9433n	0.822984	0.0268539	0.0630128	0.747906	1.55521	CaseC:Control	NA	NULL	NA	NA	NA	NA	NA	NA	NA	NA	NA	NA	NA	NULL	down
0.50_522.9009m/z	0.720938	0.0454492	0.0524259	0.726908	1.88743	CaseC:Control	NA	NULL	NA	NA	NA	NA	NA	NA	NA	NA	NA	NA	NA	NULL	down
0.52_733.8474m/z	1.43128	0.0362487	0.0432571	0.702966	2.40215	CaseC:Control	NA	NULL	NA	NA	NA	NA	NA	NA	NA	NA	NA	NA	NA	NULL	up
0.53_726.9029m/z	1.2908	0.0163359	0.0146896	0.520335	1.8225	CaseC:Control	NA	NULL	NA	NA	NA	NA	NA	NA	NA	NA	NA	NA	NA	NULL	up
0.56_247.0056n	0.757181	0.0262094	0.035463	0.675585	2.03713	CaseC:Control	NA	NULL	NA	NA	NA	NA	NA	NA	NA	NA	NA	NA	NA	NULL	down
0.58_202.0462n	0.738841	0.0299045	0.00105003	0.238043	1.99219	CaseC:Control	C20581	C20581	C8H10O6	M+H, M+NH4	37.7	0	-7.52329	97.0471	cis-(Homo)2-aconitate;	203.053	202.046	0.576217	1	map00680 Methane metabolism; map01120 Microbial metabolism in diverse environments; map01210 2-Oxocarboxylic acid metabolism	down
0.58_203.0914m/z	0.562451	0.0291701	0.00150469	0.262394	3.10539	CaseC:Control	C04067	C04067	C9H14O5	M+H	38.6	0	-0.0647025	92.9787	Diethyl 2-methyl-3-oxosuccinate; Diethyl oxalpropionate; Butanedioic acid, 2-methyl-3-oxo-, 1,4-diethyl ester;	203.091	NA	0.576217	1	NULL	down
0.58_203.0914m/z	0.562451	0.0291701	0.00150469	0.262394	3.10539	CaseC:Control	C10930	C10930	C10H10N4O	M+H	37.6	0	-6.68276	95.509	Metamitron; Goltix;	203.091	NA	0.576217	1	NULL	down
0.58_203.0914m/z	0.562451	0.0291701	0.00150469	0.262394	3.10539	CaseC:Control	C19117	C19117	C10H7N3O	M+NH4	37.4	0	-7.2976	95.2084	Cyometrinil;	203.091	NA	0.576217	1	NULL	down
0.58_222.0628n	0.756904	0.0177359	0.000487	0.184054	1.96938	CaseC:Control	C17532	C17532	C10H10N2O4	M+H-H2O, M+K	39.8	6.64	-5.51371	98.6019	Metoxadiazone;	205.06	222.063	0.576217	1	NULL	down
0.58_248.9998m/z	1.22334	0.0278369	0.0524259	0.726908	1.59221	CaseC:Control	C00818	C00818	C6H10O8	M+K	38.2	0	-4.35732	96.0497	D-Glucarate; D-Glucaric acid; L-Gularic acid; D-Saccharic acid; D-Glucosaccharic acid; Glucaric acid; Glucarate;	249	NA	0.576217	1	map00053 Ascorbate and aldarate metabolism; map01100 Metabolic pathways	up
0.58_248.9998m/z	1.22334	0.0278369	0.0524259	0.726908	1.59221	CaseC:Control	C21088	C21088	C6H10O8	M+K	38.2	0	-4.35732	96.0497	L-Altarate; L-Talarate; (2R,3R,4S,5R)-2,3,4,5-Tetrahydroxyhexanedioate;	249	NA	0.576217	1	NULL	up
0.58_248.9998m/z	1.22334	0.0278369	0.0524259	0.726908	1.59221	CaseC:Control	C00879	C00879	C6H10O8	M+K	38.2	0	-4.35732	96.0497	D-Galactarate; D-Mucic acid; D-Galactaric acid; Galactaric acid; Galactarate; Mucic acid;	249	NA	0.576217	1	map00053 Ascorbate and aldarate metabolism	up
0.58_248.9998m/z	1.22334	0.0278369	0.0524259	0.726908	1.59221	CaseC:Control	C12649	C12649	C6H10O8	M+K	38.2	0	-4.35732	96.0497	Citric acid monohydrate;	249	NA	0.576217	1	NULL	up
0.58_280.0933m/z	0.808451	0.0186946	0.0432571	0.702966	1.4541	CaseC:Control	C19462	C19462	C12H15N3O6	M+H-H2O	39	2.48	1.64008	94.7043	Musk xylene;	280.093	NA	0.576217	1	NULL	down
0.58_280.0933m/z	0.808451	0.0186946	0.0432571	0.702966	1.4541	CaseC:Control	C02328	C02328	C15H14NNaO3	M+H	37.7	0	-4.0482	93.0483	Tolmetin sodium;	280.093	NA	0.576217	1	NULL	down
0.58_280.0933m/z	0.808451	0.0186946	0.0432571	0.702966	1.4541	CaseC:Control	C08052	C08052	C12H10N2O5	M+NH4	38.6	0	1.85937	95.3323	Cinoxacin;	280.093	NA	0.576217	1	NULL	down
0.58_280.0933m/z	0.808451	0.0186946	0.0432571	0.702966	1.4541	CaseC:Control	C16633	C16633	C9H11FN2O6	M+NH4	39.1	0.0608	-2.50174	98.2077	5-Fluorouridine;	280.093	NA	0.576217	1	map00983 Drug metabolism - other enzymes	down
0.58_280.0933m/z	0.808451	0.0186946	0.0432571	0.702966	1.4541	CaseC:Control	C12181	C12181	C15H15NO3	M+Na	37.6	0	-4.39431	93.0376	Ismine;	280.093	NA	0.576217	1	NULL	down
0.58_280.0933m/z	0.808451	0.0186946	0.0432571	0.702966	1.4541	CaseC:Control	C07149	C07149	C15H15NO3	M+Na	37.6	0	-4.39431	93.0376	Tolmetin;	280.093	NA	0.576217	1	NULL	down
0.58_280.0933m/z	0.808451	0.0186946	0.0432571	0.702966	1.4541	CaseC:Control	C11841	C11841	C12H19NO4	M+K	38.5	2.61	-5.31639	95.8109	N-(3-Oxooctanoyl)homoserine lactone; N-(3-Oxooctanoyl)-L-homoserine lactone; OOHL;	280.093	NA	0.576217	1	NULL	down
0.58_427.0905m/z	0.798092	0.0368491	0.0232306	0.601873	1.65847	CaseC:Control	C16489	C16489	C12H25N2O10P	M+K	37.8	0	6.90746	96.8777	Fructoselysine 6-phosphate;	427.091	NA	0.576217	1	map02060 Phosphotransferase system (PTS)	down
0.58_427.0905m/z	0.798092	0.0368491	0.0232306	0.601873	1.65847	CaseC:Control	C20979	C20979	C12H25N2O10P	M+K	39	5.73	6.90746	96.8777	Glucoselysine-6-phosphate;	427.091	NA	0.576217	1	map02060 Phosphotransferase system (PTS)	down
0.59_126.0329n	0.7662	0.00790319	0.000725	0.234887	1.90158	CaseC:Control	C20718	C20718	C6H6O3	M+H-H2O, M+H	35.9	0	9.94171	90.2419	4-Hydroxy-5-methyl-2-methylenefuran-3(2H)-one;	127.04	126.033	0.5905	1	NULL	down
0.59_126.0329n	0.7662	0.00790319	0.000725	0.234887	1.90158	CaseC:Control	C01108	C01108	C6H6O3	M+H-H2O, M+H	35.9	0	9.94171	90.2419	1,2,3-Trihydroxybenzene; Pyrogallol; Pyrogallic acid; 1,2,3-Benzenetriol;	127.04	126.033	0.5905	1	map00627 Aminobenzoate degradation; map01120 Microbial metabolism in diverse environments; map07216 Catecholamine transferase inhibitors	down
0.59_126.0329n	0.7662	0.00790319	0.000725	0.234887	1.90158	CaseC:Control	C02814	C02814	C6H6O3	M+H-H2O, M+H	35.9	0	9.94171	90.2419	Benzene-1,2,4-triol; Hydroxyhydroquinone; 1,2,4-Benzenetriol; 1,2,4-Trihydroxybenzene; Hydroxyquinol;	127.04	126.033	0.5905	1	map00361 Chlorocyclohexane and chlorobenzene degradation; map00362 Benzoate degradation; map00627 Aminobenzoate degradation; map01100 Metabolic pathways; map01120 Microbial metabolism in diverse environments	down
0.59_126.0329n	0.7662	0.00790319	0.000725	0.234887	1.90158	CaseC:Control	C02183	C02183	C6H6O3	M+H-H2O, M+H	35.9	0	9.94171	90.2419	Phloroglucinol; 1,3,5-Benzenetriol; 1,3,5-Trihydroxybenzene;	127.04	126.033	0.5905	1	map00627 Aminobenzoate degradation; map01120 Microbial metabolism in diverse environments	down
0.59_126.0329n	0.7662	0.00790319	0.000725	0.234887	1.90158	CaseC:Control	C02752	C02752	C6H6O3	M+H-H2O, M+H	35.9	0	9.94171	90.2419	Triacetate lactone; 4-Hydroxy-6-methyl-2-pyrone;	127.04	126.033	0.5905	1	NULL	down
0.59_126.0329n	0.7662	0.00790319	0.000725	0.234887	1.90158	CaseC:Control	C11918	C11918	C6H6O3	M+H-H2O, M+H	35.9	0	9.94171	90.2419	Maltol;	127.04	126.033	0.5905	1	map00523 Polyketide sugar unit biosynthesis; map01130 Biosynthesis of antibiotics	down
0.59_126.0329n	0.7662	0.00790319	0.000725	0.234887	1.90158	CaseC:Control	C11101	C11101	C6H6O3	M+H-H2O, M+H	35.9	0	9.94171	90.2419	5-Hydroxymethyl-2-furaldehyde; HMF; 5-Hydroxymethylfurfural;	127.04	126.033	0.5905	1	map00365 Furfural degradation; map01120 Microbial metabolism in diverse environments	down
0.59_186.0772m/z	0.740513	0.015279	0.035463	0.675585	1.87133	CaseC:Control	C12986	C12986	C8H13NO5	M+H-H2O	35.6	12.6	5.25687	71.6351	N2-Acetyl-L-aminoadipate;	186.077	NA	0.5905	1	NULL	down
0.59_186.0772m/z	0.740513	0.015279	0.035463	0.675585	1.87133	CaseC:Control	C15383	C15383	C9H9N5O	M+H-H2O	34.4	0	-1.32879	73.5026	(5-Phenyl-1,2,4-triazol-3-yl)urea; 3-Phenyl-5-ureido-1,2,4-triazole;	186.077	NA	0.5905	1	NULL	down
0.59_186.0772m/z	0.740513	0.015279	0.035463	0.675585	1.87133	CaseC:Control	C05343	C05343	C8H8O4	M+NH4	36.2	16.6	6.35296	71.4981	(R)-4-Hydroxymandelate;	186.077	NA	0.5905	1	map01120 Microbial metabolism in diverse environments	down
0.59_186.0772m/z	0.740513	0.015279	0.035463	0.675585	1.87133	CaseC:Control	C03198	C03198	C8H8O4	M+NH4	36.2	16.6	6.35296	71.4981	(S)-4-Hydroxymandelate; (S)-2-Hydroxy-2-(4-hydroxyphenyl)acetate; L-4-Hydroxymandelate; L-p-Hydroxymandelate;	186.077	NA	0.5905	1	map00261 Monobactam biosynthesis; map00627 Aminobenzoate degradation; map01055 Biosynthesis of vancomycin group antibiotics; map01120 Microbial metabolism in diverse environments; map01130 Biosynthesis of antibiotics	down
0.59_186.0772m/z	0.740513	0.015279	0.035463	0.675585	1.87133	CaseC:Control	C01161	C01161	C8H8O4	M+NH4	36	15.8	6.35296	71.4981	3,4-Dihydroxyphenylacetate; 3,4-Dihydroxyphenylacetic acid; Homoprotocatechuate;	186.077	NA	0.5905	1	map00350 Tyrosine metabolism; map01100 Metabolic pathways; map01120 Microbial metabolism in diverse environments; map01220 Degradation of aromatic compounds; map04728 Dopaminergic synapse; map05030 Cocaine addiction; map05031 Amphetamine addiction; map05034 Alcoholism	down
0.59_186.0772m/z	0.740513	0.015279	0.035463	0.675585	1.87133	CaseC:Control	C03235	C03235	C8H8O4	M+NH4	36.2	16.6	6.35296	71.4981	4-Hydroxypheoxyacetate;	186.077	NA	0.5905	1	NULL	down
0.59_186.0772m/z	0.740513	0.015279	0.035463	0.675585	1.87133	CaseC:Control	C07087	C07087	C8H8O4	M+NH4	35.2	11.5	6.35296	71.4981	2-Hydroxy-6-oxoocta-2,4,7-trienoate;	186.077	NA	0.5905	1	map00643 Styrene degradation; map01100 Metabolic pathways; map01120 Microbial metabolism in diverse environments; map01220 Degradation of aromatic compounds	down
0.59_186.0772m/z	0.740513	0.015279	0.035463	0.675585	1.87133	CaseC:Control	C16215	C16215	C8H8O4	M+NH4	35.3	12.3	6.35296	71.4981	1,2-Dihydrophthalic acid; Cyclohexa-3,5-diene-1,2-dicarboxylate;	186.077	NA	0.5905	1	map00624 Polycyclic aromatic hydrocarbon degradation; map01120 Microbial metabolism in diverse environments	down
0.59_186.0772m/z	0.740513	0.015279	0.035463	0.675585	1.87133	CaseC:Control	C06672	C06672	C8H8O4	M+NH4	36.3	17.1	6.35296	71.4981	Vanillate; Vanillic acid; 4-Hydroxy-3-methoxybenzoate; 4-Hydroxy-3-methoxybenzoic acid;	186.077	NA	0.5905	1	map00627 Aminobenzoate degradation; map01120 Microbial metabolism in diverse environments	down
0.59_186.0772m/z	0.740513	0.015279	0.035463	0.675585	1.87133	CaseC:Control	C00544	C00544	C8H8O4	M+NH4	36	15.8	6.35296	71.4981	Homogentisate; Homogentisic acid; 2,5-Dihydroxyphenylacetic acid; 2,5-Dihydroxyphenylacetate;	186.077	NA	0.5905	1	map00130 Ubiquinone and other terpenoid-quinone biosynthesis; map00350 Tyrosine metabolism; map00643 Styrene degradation; map01100 Metabolic pathways; map01120 Microbial metabolism in diverse environments	down
0.59_186.0772m/z	0.740513	0.015279	0.035463	0.675585	1.87133	CaseC:Control	C14109	C14109	C8H8O4	M+NH4	36.3	17.1	6.35296	71.4981	4-Hydroxymethylsalicylate; 2-Hydroxy-4-hydroxymethylbenzoic acid;	186.077	NA	0.5905	1	map00626 Naphthalene degradation; map01120 Microbial metabolism in diverse environments	down
0.59_186.0772m/z	0.740513	0.015279	0.035463	0.675585	1.87133	CaseC:Control	C11527	C11527	C8H8O4	M+NH4	36.2	16.6	6.35296	71.4981	4-Hydroxymandelate; 4-Hydroxymandelic acid;	186.077	NA	0.5905	1	NULL	down
0.59_186.0772m/z	0.740513	0.015279	0.035463	0.675585	1.87133	CaseC:Control	C06207	C06207	C8H8O4	M+NH4	36	15.8	6.35296	71.4981	2,6-Dihydroxyphenylacetate;	186.077	NA	0.5905	1	map00360 Phenylalanine metabolism	down
0.59_186.0772m/z	0.740513	0.015279	0.035463	0.675585	1.87133	CaseC:Control	C01839	C01839	C8H8O4	M+NH4	36	15.9	6.35296	71.4981	Orsellinate; o-Orsellinic acid; 2,4-Dihydroxy-6-methylbenzoic acid; 2,4-Dihydroxy-6-methylbenzoate; 4,6-Dihydroxy-o-toluic acid;	186.077	NA	0.5905	1	NULL	down
0.59_186.0772m/z	0.740513	0.015279	0.035463	0.675585	1.87133	CaseC:Control	C05577	C05577	C8H8O4	M+NH4	35.5	13.3	6.35296	71.4981	3,4-Dihydroxymandelaldehyde; 3,4-Dihydroxyphenylglycolaldehyde;	186.077	NA	0.5905	1	map00350 Tyrosine metabolism; map01100 Metabolic pathways	down
0.59_186.0772m/z	0.740513	0.015279	0.035463	0.675585	1.87133	CaseC:Control	C10331	C10331	C8H8O4	M+NH4	32.9	0	6.35296	71.4981	2,6-Dimethoxybenzoquinone; 2,6-Dimetoxy-p-benzoquinone;	186.077	NA	0.5905	1	NULL	down
0.59_258.1109m/z	0.787731	0.01529	0.035463	0.675585	1.63263	CaseC:Control	C18048	C18048	C10H17N3O6	M+H-H2O	37.6	0	8.79996	97.5756	N-Succinyl-L-citrulline;	258.111	NA	0.5905	1	NULL	down
0.59_258.1109m/z	0.787731	0.01529	0.035463	0.675585	1.63263	CaseC:Control	C05283	C05283	C10H17N3O6	M+H-H2O	38.2	3.29	8.79996	97.5756	(5-L-Glutamyl)-L-glutamine;	258.111	NA	0.5905	1	NULL	down
0.59_258.1109m/z	0.787731	0.01529	0.035463	0.675585	1.63263	CaseC:Control	C10662	C10662	C15H17NO4	M+H-H2O	38	3.08	-5.8222	93.6067	Dubinidine;	258.111	NA	0.5905	1	NULL	down
0.59_258.1109m/z	0.787731	0.01529	0.035463	0.675585	1.63263	CaseC:Control	C12181	C12181	C15H15NO3	M+H	38.5	5.99	-6.23005	93.8327	Ismine;	258.111	NA	0.5905	1	NULL	down
0.59_258.1109m/z	0.787731	0.01529	0.035463	0.675585	1.63263	CaseC:Control	C07149	C07149	C15H15NO3	M+H	38	3.18	-6.23005	93.8327	Tolmetin;	258.111	NA	0.5905	1	NULL	down
0.59_258.1109m/z	0.787731	0.01529	0.035463	0.675585	1.63263	CaseC:Control	C21417	C21417	C15H12O3	M+NH4	38.6	6.54	-6.67188	94.195	NA	258.111	NA	0.5905	1	NULL	down
0.59_258.1109m/z	0.787731	0.01529	0.035463	0.675585	1.63263	CaseC:Control	C15570	C15570	C15H12O3	M+NH4	38.6	6.54	-6.67188	94.195	Dihydroflavonol;	258.111	NA	0.5905	1	NULL	down
0.59_258.1109m/z	0.787731	0.01529	0.035463	0.675585	1.63263	CaseC:Control	C19896	C19896	C15H12O3	M+NH4	39.3	9.86	-6.67188	94.195	4'-Hydroxyflavanone;	258.111	NA	0.5905	1	NULL	down
0.59_258.1109m/z	0.787731	0.01529	0.035463	0.675585	1.63263	CaseC:Control	C10258	C10258	C15H12O3	M+NH4	37.3	0	-6.67188	94.195	Flavidin; 9,10-Dihydro-5H-phenanthro[4,5-bcd]pyran-2,7-diol;	258.111	NA	0.5905	1	NULL	down
0.59_258.1109m/z	0.787731	0.01529	0.035463	0.675585	1.63263	CaseC:Control	C14221	C14221	C15H12O3	M+NH4	38.6	6.27	-6.67188	94.195	6-Hydroxyflavanone;	258.111	NA	0.5905	1	NULL	down
0.59_258.1109m/z	0.787731	0.01529	0.035463	0.675585	1.63263	CaseC:Control	C14290	C14290	C15H12O3	M+NH4	38.6	6.27	-6.67188	94.195	7-Hydroxyflavanone;	258.111	NA	0.5905	1	NULL	down
0.59_258.1109m/z	0.787731	0.01529	0.035463	0.675585	1.63263	CaseC:Control	C14241	C14241	C15H12O3	M+NH4	39.3	9.86	-6.67188	94.195	4'-Hydroxyflavanone; 2,3-Dihydro-2-(4-hydroxyphenyl)-4H-1-benzopyran-4-one;	258.111	NA	0.5905	1	NULL	down
0.59_258.1109m/z	0.787731	0.01529	0.035463	0.675585	1.63263	CaseC:Control	C10314	C10314	C15H12O3	M+NH4	38.6	6.41	-6.67188	94.195	Chrysophanic acid 9-anthrone; Chrysophanol anthrone; Chrysarobin;	258.111	NA	0.5905	1	NULL	down
0.59_258.1109m/z	0.787731	0.01529	0.035463	0.675585	1.63263	CaseC:Control	C15204	C15204	C15H12O3	M+NH4	39.3	9.86	-6.67188	94.195	3'-Hydroxyflavanone;	258.111	NA	0.5905	1	NULL	down
0.59_258.1109m/z	0.787731	0.01529	0.035463	0.675585	1.63263	CaseC:Control	C17857	C17857	C15H12O3	M+NH4	38.4	5.39	-6.67188	94.195	Acetylatractylodinol;	258.111	NA	0.5905	1	NULL	down
0.59_258.1109m/z	0.787731	0.01529	0.035463	0.675585	1.63263	CaseC:Control	C09573	C09573	C13H17NO3	M+Na	38.3	0	3.41913	95.6466	Lophophorine;	258.111	NA	0.5905	1	NULL	down
0.59_258.1109m/z	0.787731	0.01529	0.035463	0.675585	1.63263	CaseC:Control	C13664	C13664	C13H19N2O+	M+K	37.4	2.05	-9.25541	94.9651	Bufotenidine; N,N,N-Trimethylserotonin; 5-HTQ;	258.111	NA	0.5905	1	NULL	down
0.59_279.1924m/z	1.3804	0.0424386	0.0892096	0.815476	2.18959	CaseC:Control	NA	NULL	NA	NA	NA	NA	NA	NA	NA	NA	NA	NA	NA	NULL	up
0.59_320.9680m/z	0.782885	0.0205163	0.00519604	0.420694	1.70151	CaseC:Control	NA	NULL	NA	NA	NA	NA	NA	NA	NA	NA	NA	NA	NA	NULL	down
0.59_325.1135m/z	0.614572	0.000576	0.000725	0.234887	2.2089	CaseC:Control	C04147	C04147	C12H22O11	M+H-H2O	44.9	44.8	1.64067	81.4816	alpha-D-Glucosyl-(1,3)-D-mannose;	325.113	NA	0.5905	1	NULL	down
0.59_325.1135m/z	0.614572	0.000576	0.000725	0.234887	2.2089	CaseC:Control	C01235	C01235	C12H22O11	M+H-H2O	44.9	44.8	1.64067	81.4816	alpha-D-Galactosyl-(1->3)-1D-myo-inositol; O-alpha-D-Galactosyl-(1->3)-1D-myo-inositol; 3-O-alpha-D-Galactosyl-1D-myo-inositol; 1-alpha-D-Galactosyl-myo-inositol; Galactinol;	325.113	NA	0.5905	1	map00052 Galactose metabolism	down
0.59_325.1135m/z	0.614572	0.000576	0.000725	0.234887	2.2089	CaseC:Control	C20861	C20861	C12H22O11	M+H-H2O	45.4	47.7	1.64067	81.4816	Mannobiose; beta-1,4-Mannobiose;	325.113	NA	0.5905	1	NULL	down
0.59_325.1135m/z	0.614572	0.000576	0.000725	0.234887	2.2089	CaseC:Control	C00208	C00208	C12H22O11	M+H-H2O	45.5	47.9	1.64067	81.4816	Maltose; Malt sugar; alpha-D-Glucopyranosyl-(1->4)-D-glucopyranose;	325.113	NA	0.5905	1	map00500 Starch and sucrose metabolism; map01100 Metabolic pathways; map02010 ABC transporters; map02030 Bacterial chemotaxis; map02060 Phosphotransferase system (PTS); map04742 Taste transduction; map04973 Carbohydrate digestion and absorption	down
0.59_325.1135m/z	0.614572	0.000576	0.000725	0.234887	2.2089	CaseC:Control	C00185	C00185	C12H22O11	M+H-H2O	45.5	47.9	1.64067	81.4816	Cellobiose; 1-beta-D-Glucopyranosyl-4-D-glucopyranose;	325.113	NA	0.5905	1	map00500 Starch and sucrose metabolism; map01100 Metabolic pathways; map02010 ABC transporters; map02060 Phosphotransferase system (PTS)	down
0.59_325.1135m/z	0.614572	0.000576	0.000725	0.234887	2.2089	CaseC:Control	C19773	C19773	C12H22O11	M+H-H2O	44.9	44.8	1.64067	81.4816	3-O-alpha-D-Mannopyranosyl-alpha-D-mannopyranose;	325.113	NA	0.5905	1	NULL	down
0.59_325.1135m/z	0.614572	0.000576	0.000725	0.234887	2.2089	CaseC:Control	C19634	C19634	C12H22O11	M+H-H2O	44.9	44.8	1.64067	81.4816	Melibiulose; 6-O-alpha-D-Galactopyranosyl-D-fructose;	325.113	NA	0.5905	1	NULL	down
0.59_325.1135m/z	0.614572	0.000576	0.000725	0.234887	2.2089	CaseC:Control	C02964	C02964	C12H22O11	M+H-H2O	45.5	47.9	1.64067	81.4816	4-O-beta-D-Glucopyranosyl-D-mannose;	325.113	NA	0.5905	1	NULL	down
0.59_325.1135m/z	0.614572	0.000576	0.000725	0.234887	2.2089	CaseC:Control	C19632	C19632	C12H22O11	M+H-H2O	45	45.7	1.64067	81.4816	Kojibiose; 2-O-alpha-D-Glucopyranosyl-D-glucose;	325.113	NA	0.5905	1	NULL	down
0.59_325.1135m/z	0.614572	0.000576	0.000725	0.234887	2.2089	CaseC:Control	C01742	C01742	C12H22O11	M+H-H2O	45.5	47.9	1.64067	81.4816	Palatinose; Isomaltulose; 6-O-alpha-D-Glucopyranosyl-D-fructofuranose;	325.113	NA	0.5905	1	NULL	down
0.59_325.1135m/z	0.614572	0.000576	0.000725	0.234887	2.2089	CaseC:Control	C01083	C01083	C12H22O11	M+H-H2O	44.9	44.8	1.64067	81.4816	alpha,alpha-Trehalose; alpha,alpha'-Trehalose; Trehalose;	325.113	NA	0.5905	1	map00500 Starch and sucrose metabolism; map01100 Metabolic pathways; map01110 Biosynthesis of secondary metabolites; map02010 ABC transporters; map02060 Phosphotransferase system (PTS)	down
0.59_325.1135m/z	0.614572	0.000576	0.000725	0.234887	2.2089	CaseC:Control	C19633	C19633	C12H22O11	M+H-H2O	44.9	44.8	1.64067	81.4816	Maltulose; 4-O-alpha-D-Glucopyranosyl-D-fructose;	325.113	NA	0.5905	1	NULL	down
0.59_325.1135m/z	0.614572	0.000576	0.000725	0.234887	2.2089	CaseC:Control	C01711	C01711	C12H22O11	M+H-H2O	44.9	44.8	1.64067	81.4816	Inulobiose; 1-O-beta-D-Fructo-furanosyl-D-fructose;	325.113	NA	0.5905	1	NULL	down
0.59_325.1135m/z	0.614572	0.000576	0.000725	0.234887	2.2089	CaseC:Control	C07064	C07064	C12H22O11	M+H-H2O	45.5	47.9	1.64067	81.4816	Lactulose;	325.113	NA	0.5905	1	NULL	down
0.59_325.1135m/z	0.614572	0.000576	0.000725	0.234887	2.2089	CaseC:Control	C21336	C21336	C12H22O11	M+H-H2O	44.9	44.8	1.64067	81.4816	NA	325.113	NA	0.5905	1	NULL	down
0.59_325.1135m/z	0.614572	0.000576	0.000725	0.234887	2.2089	CaseC:Control	C01971	C01971	C12H22O11	M+H-H2O	45.5	47.9	1.64067	81.4816	beta-Maltose;	325.113	NA	0.5905	1	NULL	down
0.59_325.1135m/z	0.614572	0.000576	0.000725	0.234887	2.2089	CaseC:Control	C04219	C04219	C12H22O11	M+H-H2O	44.9	44.8	1.64067	81.4816	alpha-D-Aldosyl beta-D-fructoside; alpha-D-Aldosyl1 beta-D-fructoside; alpha-D-Aldosyl2 beta-D-fructoside;	325.113	NA	0.5905	1	NULL	down
0.59_325.1135m/z	0.614572	0.000576	0.000725	0.234887	2.2089	CaseC:Control	C01970	C01970	C12H22O11	M+H-H2O	45.5	47.9	1.64067	81.4816	beta-Lactose; beta-D-Lactose;	325.113	NA	0.5905	1	NULL	down
0.59_325.1135m/z	0.614572	0.000576	0.000725	0.234887	2.2089	CaseC:Control	C08250	C08250	C12H22O11	M+H-H2O	44.9	44.8	1.64067	81.4816	Sophorose; alpha-Sophorose; 2-O-beta-D-Glucopyranosyl-beta-D-glucopyranose;	325.113	NA	0.5905	1	NULL	down
0.59_325.1135m/z	0.614572	0.000576	0.000725	0.234887	2.2089	CaseC:Control	C00252	C00252	C12H22O11	M+H-H2O	45.5	47.9	1.64067	81.4816	Isomaltose; Brachiose;	325.113	NA	0.5905	1	map00500 Starch and sucrose metabolism	down
0.59_325.1135m/z	0.614572	0.000576	0.000725	0.234887	2.2089	CaseC:Control	C06421	C06421	C12H22O11	M+H-H2O	45.5	47.9	1.64067	81.4816	alpha-Cellobiose; 1-beta-D-Glucopyranosyl-4-alpha-D-glucopyranose;	325.113	NA	0.5905	1	NULL	down
0.59_325.1135m/z	0.614572	0.000576	0.000725	0.234887	2.2089	CaseC:Control	C00243	C00243	C12H22O11	M+H-H2O	45.5	47.9	1.64067	81.4816	Lactose; 1-beta-D-Galactopyranosyl-4-D-glucopyranose; beta-D-Gal-(1->4)-D-Glc; Milk sugar;	325.113	NA	0.5905	1	map00052 Galactose metabolism; map01100 Metabolic pathways; map02010 ABC transporters; map02060 Phosphotransferase system (PTS); map04973 Carbohydrate digestion and absorption	down
0.59_325.1135m/z	0.614572	0.000576	0.000725	0.234887	2.2089	CaseC:Control	C15548	C15548	C12H22O11	M+H-H2O	44.9	44.8	1.64067	81.4816	2-alpha-D-Glucosyl-D-glucose;	325.113	NA	0.5905	1	NULL	down
0.59_325.1135m/z	0.614572	0.000576	0.000725	0.234887	2.2089	CaseC:Control	C18068	C18068	C12H22O11	M+H-H2O	44.9	44.8	1.64067	81.4816	beta-D-Fructofuranosyl-alpha-D-mannopyranoside; Mannosylfructose;	325.113	NA	0.5905	1	NULL	down
0.59_325.1135m/z	0.614572	0.000576	0.000725	0.234887	2.2089	CaseC:Control	C06422	C06422	C12H22O11	M+H-H2O	45.5	47.9	1.64067	81.4816	beta-Cellobiose; 1-beta-D-Glucopyranosyl-4-beta-D-glucopyranose;	325.113	NA	0.5905	1	NULL	down
0.59_325.1135m/z	0.614572	0.000576	0.000725	0.234887	2.2089	CaseC:Control	C20236	C20236	C12H22O11	M+H-H2O	45.4	47.7	1.64067	81.4816	4-O-beta-D-Mannopyranosyl-D-glucopyranose;	325.113	NA	0.5905	1	NULL	down
0.59_325.1135m/z	0.614572	0.000576	0.000725	0.234887	2.2089	CaseC:Control	C02048	C02048	C12H22O11	M+H-H2O	44.9	44.8	1.64067	81.4816	Laminaribiose; Laminariaceae; 3-beta-D-Glucosyl-D-glucose;	325.113	NA	0.5905	1	NULL	down
0.59_325.1135m/z	0.614572	0.000576	0.000725	0.234887	2.2089	CaseC:Control	C08240	C08240	C12H22O11	M+H-H2O	45.5	47.9	1.64067	81.4816	Gentiobiose;	325.113	NA	0.5905	1	NULL	down
0.59_325.1135m/z	0.614572	0.000576	0.000725	0.234887	2.2089	CaseC:Control	C01518	C01518	C12H22O11	M+H-H2O	44.9	44.8	1.64067	81.4816	Nigerose; Sakebiose; 3-O-alpha-D-Glucopyranosyl-D-glucose;	325.113	NA	0.5905	1	NULL	down
0.59_325.1135m/z	0.614572	0.000576	0.000725	0.234887	2.2089	CaseC:Control	C00089	C00089	C12H22O11	M+H-H2O	44.9	44.8	1.64067	81.4816	Sucrose; Cane sugar; Saccharose; 1-alpha-D-Glucopyranosyl-2-beta-D-fructofuranoside;	325.113	NA	0.5905	1	map00052 Galactose metabolism; map00500 Starch and sucrose metabolism; map01100 Metabolic pathways; map02010 ABC transporters; map02060 Phosphotransferase system (PTS); map04742 Taste transduction; map04973 Carbohydrate digestion and absorption	down
0.59_325.1135m/z	0.614572	0.000576	0.000725	0.234887	2.2089	CaseC:Control	C01725	C01725	C12H22O11	M+H-H2O	45.4	47.7	1.64067	81.4816	Levanbiose;	325.113	NA	0.5905	1	NULL	down
0.59_325.1135m/z	0.614572	0.000576	0.000725	0.234887	2.2089	CaseC:Control	C05400	C05400	C12H22O11	M+H-H2O	45.5	47.9	1.64067	81.4816	Epimelibiose; 6-O-(alpha-D-Galactopyranosyl)-D-mannopyranose;	325.113	NA	0.5905	1	map00052 Galactose metabolism	down
0.59_325.1135m/z	0.614572	0.000576	0.000725	0.234887	2.2089	CaseC:Control	C00897	C00897	C12H22O11	M+H-H2O	45.5	47.9	1.64067	81.4816	alpha-Maltose; alpha-Malt sugar;	325.113	NA	0.5905	1	NULL	down
0.59_325.1135m/z	0.614572	0.000576	0.000725	0.234887	2.2089	CaseC:Control	C01728	C01728	C12H22O11	M+H-H2O	45.5	47.9	1.64067	81.4816	Mannobiose; alpha-1,6-Mannobiose; alpha-D-Manp-(1->6)-D-Manp;	325.113	NA	0.5905	1	NULL	down
0.59_325.1135m/z	0.614572	0.000576	0.000725	0.234887	2.2089	CaseC:Control	C05402	C05402	C12H22O11	M+H-H2O	45.5	47.9	1.64067	81.4816	Melibiose; 6-O-(alpha-D-Galactopyranosyl)-D-glucopyranose; D-Gal-alpha1->6D-Glucose;	325.113	NA	0.5905	1	map00052 Galactose metabolism; map02010 ABC transporters	down
0.59_325.1135m/z	0.614572	0.000576	0.000725	0.234887	2.2089	CaseC:Control	C19636	C19636	C12H22O11	M+H-H2O	44.9	44.8	1.64067	81.4816	Turanose; 3-O-alpha-D-Glucopyranosyl-D-fructose; D-Turanose;	325.113	NA	0.5905	1	NULL	down
0.59_325.1135m/z	0.614572	0.000576	0.000725	0.234887	2.2089	CaseC:Control	C04333	C04333	C12H20O10	M+H	44.8	44.6	1.73184	81.5803	Bis-D-fructose 2',1:2,1'-dianhydride; Difructose anhydride I; Di-D-fructose 1,2' 2,1' dianhydride;	325.113	NA	0.5905	1	NULL	down
0.59_325.1135m/z	0.614572	0.000576	0.000725	0.234887	2.2089	CaseC:Control	C04420	C04420	C12H20O10	M+H	44.8	44.6	1.73184	81.5803	D-Fructofuranose 1,2':2,3'-dianhydride;	325.113	NA	0.5905	1	NULL	down
0.59_325.1135m/z	0.614572	0.000576	0.000725	0.234887	2.2089	CaseC:Control	C19267	C19267	C13H16N4O6	M+H	36.1	0	-2.39462	83.5908	Levofuraltadone; 5-(Morpholinomethyl)-3-[(5-nitrofurfurylidene)amino]-2- oxazolidinone;	325.113	NA	0.5905	1	NULL	down
0.59_383.1165m/z	0.637043	0.0392235	0.00208924	0.305568	2.56265	CaseC:Control	C15555	C15555	C21H20O8	M+H-H2O	44.7	45.9	9.98046	88.3471	Flavonol 3-O-D-glycoside; Flavonol 3-O-beta-D-glycoside;	383.117	NA	0.5905	1	NULL	down
0.59_383.1165m/z	0.637043	0.0392235	0.00208924	0.305568	2.56265	CaseC:Control	C03502	C03502	C21H20O8	M+H-H2O	44.7	45.9	9.98046	88.3471	Flavonol 3-O-D-galactoside;	383.117	NA	0.5905	1	NULL	down
0.59_383.1165m/z	0.637043	0.0392235	0.00208924	0.305568	2.56265	CaseC:Control	C21185	C21185	C21H20O8	M+H-H2O	36.2	3.37	9.98046	88.3471	4'-Demethylepipodophyllotoxin; (-)-4'-Demethylepipodophyllotoxin; (5R,5aR,8aR,9S)-9-Hydroxy-5-(4-hydroxy-3,5-dimethoxyphenyl)-5,8,8a,9-tetrahydrofuro[3',4':6,7]naphtho[2,3-d][1,3]dioxol-6(5aH)-one;	383.117	NA	0.5905	1	NULL	down
0.59_383.1165m/z	0.637043	0.0392235	0.00208924	0.305568	2.56265	CaseC:Control	C03946	C03946	C21H20O8	M+H-H2O	44.7	45.9	9.98046	88.3471	Flavonol 3-O-beta-D-glucoside; Flavonol 3-O-D-glucoside;	383.117	NA	0.5905	1	NULL	down
0.59_383.1165m/z	0.637043	0.0392235	0.00208924	0.305568	2.56265	CaseC:Control	C10553	C10553	C21H20O8	M+H-H2O	36.2	3.37	9.98046	88.3471	4'-Demethylpodophyllotoxin;	383.117	NA	0.5905	1	NULL	down
0.59_383.1165m/z	0.637043	0.0392235	0.00208924	0.305568	2.56265	CaseC:Control	C14963	C14963	C21H20O8	M+H-H2O	37.2	8.61	9.98046	88.3471	2-[4-(Acetyloxy)phenyl]-5,6,7,8-tetramethoxy-4H-1-benzopyran-4-one;	383.117	NA	0.5905	1	NULL	down
0.59_383.1165m/z	0.637043	0.0392235	0.00208924	0.305568	2.56265	CaseC:Control	C04074	C04074	C21H20O8	M+H-H2O	45.6	50.7	9.98046	88.3471	Isoflavone 7-O-beta-D-glucoside;	383.117	NA	0.5905	1	NULL	down
0.59_383.1165m/z	0.637043	0.0392235	0.00208924	0.305568	2.56265	CaseC:Control	C10729	C10729	C21H20O8	M+H-H2O	36.2	3.37	9.98046	88.3471	alpha-Peltatin;	383.117	NA	0.5905	1	NULL	down
0.59_96.0225n	0.730357	0.0114006	0.000487	0.184054	2.04513	CaseC:Control	NA	NULL	NA	NA	NA	NA	NA	NA	NA	NA	NA	NA	NA	NULL	down
0.60_117.0799n	0.735702	0.0463489	0.00519604	0.420694	1.85418	CaseC:Control	C01826	C01826	C5H11NO2	M+Na, M+K	39.8	10.9	7.86693	96.8919	L-Norvaline; L-2-Aminovaleric acid; L-2-Aminopentanoic acid; (S)-2-Aminopentanoic acid;	140.069	117.08	0.604783	1	NULL	down
0.60_117.0799n	0.735702	0.0463489	0.00519604	0.420694	1.85418	CaseC:Control	C16436	C16436	C5H11NO2	M+Na, M+K	39.8	10.9	7.86693	96.8919	Valine;	140.069	117.08	0.604783	1	NULL	down
0.60_117.0799n	0.735702	0.0463489	0.00519604	0.420694	1.85418	CaseC:Control	C07457	C07457	C5H11NO2	M+Na, M+K	38	1.87	7.86693	96.8919	Amyl nitrite; Isoamyl nitrite;	140.069	117.08	0.604783	1	NULL	down
0.60_117.0799n	0.735702	0.0463489	0.00519604	0.420694	1.85418	CaseC:Control	C06417	C06417	C5H11NO2	M+Na, M+K	39.8	10.9	7.86693	96.8919	D-Valine; (R)-2-Amino-3-methylbutyric acid;	140.069	117.08	0.604783	1	NULL	down
0.60_117.0799n	0.735702	0.0463489	0.00519604	0.420694	1.85418	CaseC:Control	C00431	C00431	C5H11NO2	M+Na, M+K	38.5	4.43	7.86693	96.8919	5-Aminopentanoate; 5-Aminopentanoic acid; 5-Aminovaleric acid;	140.069	117.08	0.604783	1	map00310 Lysine degradation; map00330 Arginine and proline metabolism	down
0.60_117.0799n	0.735702	0.0463489	0.00519604	0.420694	1.85418	CaseC:Control	C00719	C00719	C5H11NO2	M+Na, M+K	38	1.88	7.86693	96.8919	Betaine; Trimethylaminoacetate; Glycine betaine; N,N,N-Trimethylglycine; Trimethylammonioacetate;	140.069	117.08	0.604783	1	map00260 Glycine, serine and threonine metabolism; map01100 Metabolic pathways; map02010 ABC transporters	down
0.60_117.0799n	0.735702	0.0463489	0.00519604	0.420694	1.85418	CaseC:Control	C15987	C15987	C5H11NO2	M+Na, M+K	38.8	6.06	7.86693	96.8919	4-Methylaminobutyrate; gamma-N-Methylaminobutyrate;	140.069	117.08	0.604783	1	map00760 Nicotinate and nicotinamide metabolism; map01120 Microbial metabolism in diverse environments	down
0.60_117.0799n	0.735702	0.0463489	0.00519604	0.420694	1.85418	CaseC:Control	C03571	C03571	C5H11NO2	M+Na, M+K	39	6.77	7.86693	96.8919	2-Amino-2-methylbutanoate;	140.069	117.08	0.604783	1	NULL	down
0.60_117.0799n	0.735702	0.0463489	0.00519604	0.420694	1.85418	CaseC:Control	C01799	C01799	C5H11NO2	M+Na, M+K	39.8	10.9	7.86693	96.8919	D-Norvaline; D-2-Aminovaleric acid; D-2-Aminopentanoic acid;	140.069	117.08	0.604783	1	NULL	down
0.60_117.0799n	0.735702	0.0463489	0.00519604	0.420694	1.85418	CaseC:Control	C00183	C00183	C5H11NO2	M+Na, M+K	39.8	10.9	7.86693	96.8919	L-Valine; 2-Amino-3-methylbutyric acid;	140.069	117.08	0.604783	1	map00280 Valine, leucine and isoleucine degradation; map00290 Valine, leucine and isoleucine biosynthesis; map00311 Penicillin and cephalosporin biosynthesis; map00460 Cyanoamino acid metabolism; map00770 Pantothenate and CoA biosynthesis; map00966 Glucosinolate biosynthesis; map00970 Aminoacyl-tRNA biosynthesis; map01060 Biosynthesis of plant secondary metabolites; map01063 Biosynthesis of alkal…	down
0.60_180.0269n	1.24877	0.0473284	0.0630128	0.747906	1.55268	CaseC:Control	NA	NULL	NA	NA	NA	NA	NA	NA	NA	NA	NA	NA	NA	NULL	up
0.60_188.0359m/z	0.655926	0.00787769	0.0114962	0.482629	2.59716	CaseC:Control	C02470	C02470	C10H7NO4	M+H-H2O	29.6	3.73	7.98353	53.2073	Xanthurenic acid; Xanthurenate;	188.036	NA	0.604783	1	map00380 Tryptophan metabolism	down
0.60_188.0359m/z	0.655926	0.00787769	0.0114962	0.482629	2.59716	CaseC:Control	C05663	C05663	C10H7NO4	M+H-H2O	29.6	3.73	7.98353	53.2073	6-Hydroxykynurenate; 6-Hydroxykynurenic acid; 4,6-Dihydroxyquinaldic acid;	188.036	NA	0.604783	1	map00380 Tryptophan metabolism	down
0.60_188.0359m/z	0.655926	0.00787769	0.0114962	0.482629	2.59716	CaseC:Control	C08480	C08480	C10H7NO4	M+H-H2O	29.6	3.73	7.98353	53.2073	6-Hydroxykynurenic acid;	188.036	NA	0.604783	1	NULL	down
0.60_188.0359m/z	0.655926	0.00787769	0.0114962	0.482629	2.59716	CaseC:Control	C21306	C21306	C10H7NO4	M+H-H2O	29.4	2.79	7.98353	53.2073	NA	188.036	NA	0.604783	1	NULL	down
0.60_188.0359m/z	0.655926	0.00787769	0.0114962	0.482629	2.59716	CaseC:Control	C15998	C15998	C5H11NO3S	M+Na	29.6	0	4.06847	52.8361	L-Methionine (R)-S-oxide;	188.036	NA	0.604783	1	NULL	down
0.60_188.0359m/z	0.655926	0.00787769	0.0114962	0.482629	2.59716	CaseC:Control	C02989	C02989	C5H11NO3S	M+Na	29.6	0	4.06847	52.8361	L-Methionine S-oxide;	188.036	NA	0.604783	1	map00270 Cysteine and methionine metabolism	down
0.60_188.0359m/z	0.655926	0.00787769	0.0114962	0.482629	2.59716	CaseC:Control	C15999	C15999	C5H11NO3S	M+Na	29.6	0	4.06847	52.8361	L-Methionine (S)-S-oxide;	188.036	NA	0.604783	1	NULL	down
0.60_260.9742m/z	1.20582	0.0288944	0.035463	0.675585	1.46555	CaseC:Control	NA	NULL	NA	NA	NA	NA	NA	NA	NA	NA	NA	NA	NA	NULL	up
0.60_294.0043m/z	0.756059	0.00280813	0.00105003	0.238043	2.10166	CaseC:Control	C11100	C11100	C12H10Cl2F3NO	M+H-H2O	31.2	10.6	-4.93513	50.8641	Flurochloridone; Raiser;	294.004	NA	0.604783	1	NULL	down
0.63_160.1340m/z	0.630662	0.00382224	0.00684146	0.462973	2.3656	CaseC:Control	C16653	C16653	C8H14O2	M+NH4	39	2.7	5.55725	98.8285	2-n-Propyl-2-pentenoic acid; 2-En-valproic acid; 2-Ene-VPA;	160.134	NA	0.633367	1	map00982 Drug metabolism - cytochrome P450	down
0.63_160.1340m/z	0.630662	0.00382224	0.00684146	0.462973	2.3656	CaseC:Control	C16654	C16654	C8H14O2	M+NH4	41.7	16	5.55725	98.8285	2-n-Propyl-3-pentenoic acid; 3-En-valproic acid; 3-Ene-VPA;	160.134	NA	0.633367	1	map00982 Drug metabolism - cytochrome P450	down
0.63_160.1340m/z	0.630662	0.00382224	0.00684146	0.462973	2.3656	CaseC:Control	C16648	C16648	C8H14O2	M+NH4	41.8	16.5	5.55725	98.8285	2-n-Propyl-4-pentenoic acid; 4-En-valproic acid; 4-Ene-VPA;	160.134	NA	0.633367	1	map00982 Drug metabolism - cytochrome P450	down
0.63_160.1340m/z	0.630662	0.00382224	0.00684146	0.462973	2.3656	CaseC:Control	C12297	C12297	C8H14O2	M+NH4	39.1	2.91	5.55725	98.8285	Cyclohexyl acetate;	160.134	NA	0.633367	1	NULL	down
0.63_160.1340m/z	0.630662	0.00382224	0.00684146	0.462973	2.3656	CaseC:Control	C19318	C19318	C8H14O2	M+NH4	41.1	12.9	5.55725	98.8285	Allyl isovalerate;	160.134	NA	0.633367	1	NULL	down
0.63_160.1340m/z	0.630662	0.00382224	0.00684146	0.462973	2.3656	CaseC:Control	C19757	C19757	C8H14O2	M+NH4	39	2.69	5.55725	98.8285	(Z)-3-Hexen-1-ol acetate; (3Z)-Hex-3-en-1-yl acetate; cis-3-Hexenyl acetate;	160.134	NA	0.633367	1	map00592 alpha-Linolenic acid metabolism; map01110 Biosynthesis of secondary metabolites	down
0.63_160.1340m/z	0.630662	0.00382224	0.00684146	0.462973	2.3656	CaseC:Control	C12104	C12104	C8H14O2	M+NH4	39.9	6.91	5.55725	98.8285	Cycloheptanecarboxylic acid; Cycloheptanoic acid;	160.134	NA	0.633367	1	NULL	down
0.63_162.1394m/z	0.596893	0.0157386	0.0114962	0.482629	2.46525	CaseC:Control	NA	NULL	NA	NA	NA	NA	NA	NA	NA	NA	NA	NA	NA	NULL	down
0.63_164.9272m/z	1.39119	0.0245392	0.075256	0.77902	1.9327	CaseC:Control	C06899	C06899	C2H3Cl3O2	M+H	28.4	0	0.249284	42.3862	Chloral hydrate;	164.927	NA	0.633367	1	map00980 Metabolism of xenobiotics by cytochrome P450; map05204 Chemical carcinogenesis	up
0.63_164.9272m/z	1.39119	0.0245392	0.075256	0.77902	1.9327	CaseC:Control	C08372	C08372	C2H6S3	M+K	35.2	0	6.81515	83.6952	Dimethyl trisulfide; DMTS;	164.927	NA	0.633367	1	NULL	up
0.63_174.1246m/z	1.40891	0.0024421	0.00150469	0.262394	2.04748	CaseC:Control	C08288	C08288	C7H15N3O2	M+H	37	0	5.16546	91.1733	Indospicine; L-Indospicine;	174.125	NA	0.633367	1	NULL	up
0.63_174.1246m/z	1.40891	0.0024421	0.00150469	0.262394	2.04748	CaseC:Control	C06818	C06818	C10H17N	M+Na	36.8	0	-4.78269	89.314	Amantadine;	174.125	NA	0.633367	1	NULL	up
0.63_217.0693m/z	0.773458	0.0277548	0.0630128	0.747906	1.32309	CaseC:Control	C16598	C16598	C9H14O7	M+H-H2O	40.1	12.1	-5.68602	94.9984	(R)-(Homo)3-citrate; (R)-2-Hydroxy-1,2,6-hexanetricarboxylate; (R)-2-Hydroxy-1,2,6-hexanetricarboxylic acid;	217.069	NA	0.633367	1	map00680 Methane metabolism; map01120 Microbial metabolism in diverse environments; map01210 2-Oxocarboxylic acid metabolism	down
0.63_217.0693m/z	0.773458	0.0277548	0.0630128	0.747906	1.32309	CaseC:Control	C16600	C16600	C9H14O7	M+H-H2O	41.6	19.5	-5.68602	94.9984	(-)-threo-Iso(homo)3-citrate; (-)-threo-1-Hydroxy-1,2,6-hexanetricarboxylic acid; 1-Hydroxyhexane-1,2,6-tricarboxylate; threo-(Homo)3-isocitrate;	217.069	NA	0.633367	1	map00680 Methane metabolism; map01120 Microbial metabolism in diverse environments; map01210 2-Oxocarboxylic acid metabolism	down
0.63_217.0693m/z	0.773458	0.0277548	0.0630128	0.747906	1.32309	CaseC:Control	C20582	C20582	C9H12O6	M+H	38.7	5.27	-6.15998	95.1373	cis-(Homo)3-aconitate;	217.069	NA	0.633367	1	map00680 Methane metabolism; map01120 Microbial metabolism in diverse environments; map01210 2-Oxocarboxylic acid metabolism	down
0.63_217.0693m/z	0.773458	0.0277548	0.0630128	0.747906	1.32309	CaseC:Control	C03365	C03365	C7H14O6	M+Na	40.8	16.9	5.53765	93.4614	5-O-Methyl-myo-inositol; 1D-5-O-Methyl-myo-inositol; Sequoyitol;	217.069	NA	0.633367	1	NULL	down
0.63_217.0693m/z	0.773458	0.0277548	0.0630128	0.747906	1.32309	CaseC:Control	C03844	C03844	C7H14O6	M+Na	40.8	16.9	5.53765	93.4614	D-Pinitol; 1D-3-O-Methyl-chiro-inositol; 5D-5-O-Methyl-chiro-inositol;	217.069	NA	0.633367	1	NULL	down
0.63_217.0693m/z	0.773458	0.0277548	0.0630128	0.747906	1.32309	CaseC:Control	C06352	C06352	C7H14O6	M+Na	40.8	16.9	5.53765	93.4614	4-O-Methyl-myo-inositol; 1D-4-O-Methyl-myo-inositol;	217.069	NA	0.633367	1	NULL	down
0.63_217.0693m/z	0.773458	0.0277548	0.0630128	0.747906	1.32309	CaseC:Control	C05163	C05163	C7H14O6	M+Na	40.8	16.9	5.53765	93.4614	O-Methyl-scyllo-inositol; 1-O-Methyl-scyllo-inositol;	217.069	NA	0.633367	1	NULL	down
0.63_217.0693m/z	0.773458	0.0277548	0.0630128	0.747906	1.32309	CaseC:Control	C03659	C03659	C7H14O6	M+Na	40.8	16.9	5.53765	93.4614	D-Bornesitol; (-)-Bornesitol; 1-O-Methyl-myo-inositol; 1D-1-O-Methyl-myo-inositol;	217.069	NA	0.633367	1	map00562 Inositol phosphate metabolism	down
0.63_217.0693m/z	0.773458	0.0277548	0.0630128	0.747906	1.32309	CaseC:Control	C06353	C06353	C7H14O6	M+Na	40.8	16.9	5.53765	93.4614	6-O-Methyl-myo-inositol; 1D-6-O-Methyl-myo-inositol;	217.069	NA	0.633367	1	NULL	down
0.63_217.0693m/z	0.773458	0.0277548	0.0630128	0.747906	1.32309	CaseC:Control	C03660	C03660	C7H14O6	M+Na	40.8	16.9	5.53765	93.4614	L-Bornesitol; (+)-Bornesitol; 3-O-Methyl-myo-inositol; 1D-3-O-Methyl-myo-inositol;	217.069	NA	0.633367	1	map00562 Inositol phosphate metabolism	down
0.63_217.0693m/z	0.773458	0.0277548	0.0630128	0.747906	1.32309	CaseC:Control	C08257	C08257	C7H14O6	M+Na	40.8	16.9	5.53765	93.4614	(-)-Quebrachitol;	217.069	NA	0.633367	1	NULL	down
0.63_217.0693m/z	0.773458	0.0277548	0.0630128	0.747906	1.32309	CaseC:Control	C03619	C03619	C7H14O6	M+Na	40.9	17.3	5.53765	93.4614	Methyl beta-D-galactoside; Methyl beta-D-galactopyranoside;	217.069	NA	0.633367	1	map02010 ABC transporters	down
0.63_217.0693m/z	0.773458	0.0277548	0.0630128	0.747906	1.32309	CaseC:Control	C07481	C07481	C8H10N4O2	M+Na	38.9	0	-1.35342	96.0896	Caffeine; 1,3,7-Trimethylxanthine;	217.069	NA	0.633367	1	map00232 Caffeine metabolism; map01060 Biosynthesis of plant secondary metabolites; map01065 Biosynthesis of alkaloids derived from histidine and purine; map01100 Metabolic pathways; map01110 Biosynthesis of secondary metabolites; map01120 Microbial metabolism in diverse environments	down
0.63_228.1120n	1.22369	0.0138829	0.0185434	0.549514	1.49367	CaseC:Control	C13733	C13733	C10H16N2O4	M+H, M+K	37.6	1.65	4.43476	91.2804	(S)-ATPA;	267.06	228.112	0.633367	1	NULL	up
0.63_230.0964m/z	0.761942	0.0084731	0.0114962	0.482629	1.35613	CaseC:Control	C19337	C19337	C17H11N	M+H	38	2.23	-0.191098	88.0659	Benz[a]acridine;	230.096	NA	0.633367	1	NULL	down
0.63_230.0964m/z	0.761942	0.0084731	0.0114962	0.482629	1.35613	CaseC:Control	C19338	C19338	C17H11N	M+H	38	2.14	-0.191098	88.0659	Benz[c]acridine; 12-Azabenz[a]anthracene;	230.096	NA	0.633367	1	NULL	down
0.63_264.0687m/z	14.7675	1.37e-10	1.08e-05	0.0490809	8.86067	CaseC:Control	NA	NULL	NA	NA	NA	NA	NA	NA	NA	NA	NA	NA	NA	NULL	up
0.63_527.1584m/z	0.361845	0.0297476	0.035463	0.675585	3.13975	CaseC:Control	C12384	C12384	C27H28O12	M+H-H2O	36.5	0.066	6.67042	90.1685	Premithramycin A1;	527.158	NA	0.633367	1	map01057 Biosynthesis of type II polyketide products; map01130 Biosynthesis of antibiotics	down
0.63_527.1584m/z	0.361845	0.0297476	0.035463	0.675585	3.13975	CaseC:Control	C01898	C01898	C12H22O11.[C6H10O5]n-2	M+Na	21	5.22	0.321775	NA	Cellodextrin; Cellooligosaccharide;	527.158	NA	0.633367	1	NULL	down
0.63_527.1584m/z	0.361845	0.0297476	0.035463	0.675585	3.13975	CaseC:Control	C00883	C00883	C18H32O16	M+Na	39.4	5.22	0.321775	92.1564	Galactomannan; Galactomannoglycan;	527.158	NA	0.633367	1	NULL	down
0.63_527.1584m/z	0.361845	0.0297476	0.035463	0.675585	3.13975	CaseC:Control	C06219	C06219	C18H32O16	M+Na	39.4	5.22	0.321775	92.1564	Cellotriose;	527.158	NA	0.633367	1	map00500 Starch and sucrose metabolism	down
0.63_527.1584m/z	0.361845	0.0297476	0.035463	0.675585	3.13975	CaseC:Control	C17207	C17207	C12H22O11.[C6H10O5]n-2	M+Na	21	5.22	0.321775	NA	1,4-beta-D-Mannooligosaccharide; [(1->4)-beta-D-Mannosyl]n;	527.158	NA	0.633367	1	NULL	down
0.63_527.1584m/z	0.361845	0.0297476	0.035463	0.675585	3.13975	CaseC:Control	C01935	C01935	C12H22O11.[C6H10O5]n-2	M+Na	21	5.22	0.321775	NA	Maltodextrin; Maltodextrin(n); Maltodextrin(n-2); n+2 Maltodextrin; Linear maltodextrin; Maltooligosaccharide;	527.158	NA	0.633367	1	map00500 Starch and sucrose metabolism; map02010 ABC transporters	down
0.63_527.1584m/z	0.361845	0.0297476	0.035463	0.675585	3.13975	CaseC:Control	C08251	C08251	C18H32O16	M+Na	39.4	5.22	0.321775	92.1564	Umbelliferose; beta-D-Fructofuranosyl 2-O-alpha-D-galactopyranosyl-beta-D-glucopyranoside;	527.158	NA	0.633367	1	NULL	down
0.63_527.1584m/z	0.361845	0.0297476	0.035463	0.675585	3.13975	CaseC:Control	C21454	C21454	C18H32O16	M+Na	39.4	5.22	0.321775	92.1564	NA	527.158	NA	0.633367	1	NULL	down
0.63_527.1584m/z	0.361845	0.0297476	0.035463	0.675585	3.13975	CaseC:Control	C08243	C08243	C18H32O16	M+Na	39.4	5.04	0.321775	92.1564	Melezitose;	527.158	NA	0.633367	1	NULL	down
0.63_527.1584m/z	0.361845	0.0297476	0.035463	0.675585	3.13975	CaseC:Control	C00492	C00492	C18H32O16	M+Na	39.4	5.24	0.321775	92.1564	Raffinose; Melitose; Melitriose; Gossypose; 6G-alpha-D-galactosylsucrose;	527.158	NA	0.633367	1	map00052 Galactose metabolism; map02010 ABC transporters	down
0.63_527.1584m/z	0.361845	0.0297476	0.035463	0.675585	3.13975	CaseC:Control	C02493	C02493	C12H22O11.[C6H10O5]	M+Na	21	5.24	0.321775	NA	1,6-beta-D-Glucan;	527.158	NA	0.633367	1	NULL	down
0.63_527.1584m/z	0.361845	0.0297476	0.035463	0.675585	3.13975	CaseC:Control	C05404	C05404	C18H32O16	M+Na	39.4	5.24	0.321775	92.1564	D-Gal alpha 1->6D-Gal alpha 1->6D-Glucose; D-Gal-alpha1->6D-Gal-alpha1->6D-Glucose; Manninotriose;	527.158	NA	0.633367	1	map00052 Galactose metabolism	down
0.63_527.1584m/z	0.361845	0.0297476	0.035463	0.675585	3.13975	CaseC:Control	C03848	C03848	C18H32O16	M+Na	39.4	5.24	0.321775	92.1564	6F-alpha-D-Galactosylsucrose; Planteose;	527.158	NA	0.633367	1	NULL	down
0.63_527.1584m/z	0.361845	0.0297476	0.035463	0.675585	3.13975	CaseC:Control	C03200	C03200	C12H22O10.[C6H10O6]n	M+Na	21	5.22	0.321775	NA	1,3-beta-D-Oligoglucan;	527.158	NA	0.633367	1	NULL	down
0.63_527.1584m/z	0.361845	0.0297476	0.035463	0.675585	3.13975	CaseC:Control	C00420	C00420	C12H22O11.[C6H10O5]n	M+Na	21	5.22	0.321775	NA	Polysaccharide; Glycan; Polyglycose;	527.158	NA	0.633367	1	NULL	down
0.63_527.1584m/z	0.361845	0.0297476	0.035463	0.675585	3.13975	CaseC:Control	C03661	C03661	C18H32O16	M+Na	39.4	5.24	0.321775	92.1564	1F-beta-D-Fructosylsucrose; beta-D-Fructofuranosyl-(2->1)-beta-D-fructofuranosyl alpha-D-glucopyranoside;	527.158	NA	0.633367	1	NULL	down
0.63_527.1584m/z	0.361845	0.0297476	0.035463	0.675585	3.13975	CaseC:Control	C06215	C06215	C12H22O11.[C6H10O5]n	M+Na	21	5.24	0.321775	NA	Levan; (2,6-beta-D-Fructosyl)n; Levan n; 2,6-beta-D-Fructan; (2,6-beta-D-Fructosyl)n+1;	527.158	NA	0.633367	1	map00500 Starch and sucrose metabolism	down
0.63_527.1584m/z	0.361845	0.0297476	0.035463	0.675585	3.13975	CaseC:Control	C21335	C21335	C12H22O11.[C6H10O5]n-2	M+Na	21	5.22	0.321775	NA	NA	527.158	NA	0.633367	1	NULL	down
0.63_527.1584m/z	0.361845	0.0297476	0.035463	0.675585	3.13975	CaseC:Control	C06400	C06400	C12H22O11.[C6H10O5]n	M+Na	21	5.22	0.321775	NA	1-alpha-D-[(1->4)-alpha-D-Glucosyl](n-1)-alpha-D-glucopyranoside; 4-alpha-D-(1,4-alpha-D-Glucanosyl)n trehalose; Maltooligosyltrehalose;	527.158	NA	0.633367	1	NULL	down
0.63_527.1584m/z	0.361845	0.0297476	0.035463	0.675585	3.13975	CaseC:Control	C08239	C08239	C18H32O16	M+Na	39.4	5.24	0.321775	92.1564	Gentianose; beta-D-Fructofuranosyl O-beta-D-glucopyranosyl-(1-6)-alpha-D-glucopyranoside;	527.158	NA	0.633367	1	NULL	down
0.63_527.1584m/z	0.361845	0.0297476	0.035463	0.675585	3.13975	CaseC:Control	C01698	C01698	C6H12O6.[C12H20O10]n	M+Na	21	5.24	0.321775	NA	Galactogen;	527.158	NA	0.633367	1	NULL	down
0.63_527.1584m/z	0.361845	0.0297476	0.035463	0.675585	3.13975	CaseC:Control	C00713	C00713	C18H32O16	M+Na	39.4	5.24	0.321775	92.1564	Panose;	527.158	NA	0.633367	1	NULL	down
0.63_527.1584m/z	0.361845	0.0297476	0.035463	0.675585	3.13975	CaseC:Control	C07283	C07283	C12H22O10.[C6H10O6]n	M+Na	21	5.22	0.321775	NA	(1->3)-beta-D-Galactopyranans; (1->3)-beta-D-Galactans;	527.158	NA	0.633367	1	NULL	down
0.63_527.1584m/z	0.361845	0.0297476	0.035463	0.675585	3.13975	CaseC:Control	C03367	C03367	C18H32O16	M+Na	39.4	5.24	0.321775	92.1564	6-alpha-Maltosylglucose;	527.158	NA	0.633367	1	NULL	down
0.63_527.1584m/z	0.361845	0.0297476	0.035463	0.675585	3.13975	CaseC:Control	C00771	C00771	C12H22O11.[C6H10O5]n	M+Na	21	5.22	0.321775	NA	Laminarin; Laminaran;	527.158	NA	0.633367	1	NULL	down
0.63_527.1584m/z	0.361845	0.0297476	0.035463	0.675585	3.13975	CaseC:Control	C01835	C01835	C18H32O16	M+Na	39.4	5.22	0.321775	92.1564	Maltotriose; Amylotriose;	527.158	NA	0.633367	1	map02010 ABC transporters; map04973 Carbohydrate digestion and absorption	down
0.63_527.1584m/z	0.361845	0.0297476	0.035463	0.675585	3.13975	CaseC:Control	C02160	C02160	C18H32O16	M+Na	39.4	5.24	0.321775	92.1564	Isomaltotriose;	527.158	NA	0.633367	1	map02010 ABC transporters	down
0.63_527.1584m/z	0.361845	0.0297476	0.035463	0.675585	3.13975	CaseC:Control	C04417	C04417	C12H22O11.[C6H10O5]n	M+Na	21	5.24	0.321775	NA	6-alpha-D-(1,4-alpha-D-Glucano)-glucan;	527.158	NA	0.633367	1	NULL	down
0.66_123.0454m/z	0.825339	0.047438	0.075256	0.77902	1.50134	CaseC:Control	C03338	C03338	C7H8O3	M+H-H2O	37.5	0	9.34241	97.9503	2,3,5-Trihydroxytoluene;	123.045	NA	0.661933	1	NULL	down
0.66_123.0454m/z	0.825339	0.047438	0.075256	0.77902	1.50134	CaseC:Control	C20362	C20362	C7H8O3	M+H-H2O	37.5	0	9.34241	97.9503	Ethyl maltol;	123.045	NA	0.661933	1	NULL	down
0.66_123.0454m/z	0.825339	0.047438	0.075256	0.77902	1.50134	CaseC:Control	C14110	C14110	C7H8O3	M+H-H2O	37.5	0	9.34241	97.9503	4-Hydroxymethylcatechol; 3,4-Dihydroxybenzyl alcohol;	123.045	NA	0.661933	1	map00626 Naphthalene degradation; map01120 Microbial metabolism in diverse environments	down
0.66_123.0454m/z	0.825339	0.047438	0.075256	0.77902	1.50134	CaseC:Control	C18317	C18317	C7H8O3	M+H-H2O	37.5	0	9.34241	97.9503	2,4,5-Trihydroxytoluene;	123.045	NA	0.661933	1	map00633 Nitrotoluene degradation; map01120 Microbial metabolism in diverse environments	down
0.66_123.0454m/z	0.825339	0.047438	0.075256	0.77902	1.50134	CaseC:Control	C16401	C16401	C7H8O3	M+H-H2O	37.5	0	9.34241	97.9503	2,4,6-Trihydroxytoluene; 2-Methylphloroglucinol;	123.045	NA	0.661933	1	map00633 Nitrotoluene degradation; map01120 Microbial metabolism in diverse environments	down
0.66_123.0454m/z	0.825339	0.047438	0.075256	0.77902	1.50134	CaseC:Control	C10792	C10792	C7H8O3	M+H-H2O	37.5	0	9.34241	97.9503	Gentisyl alcohol; 2,5-Dihydroxybenzyl alcohol;	123.045	NA	0.661933	1	NULL	down
0.73_224.9453m/z	1.23206	0.0191496	0.0432571	0.702966	1.46148	CaseC:Control	NA	NULL	NA	NA	NA	NA	NA	NA	NA	NA	NA	NA	NA	NULL	up
0.74_215.9740m/z	0.818582	0.0160889	0.0185434	0.549514	1.42069	CaseC:Control	C06598	C06598	C6H5Cl3O	M+NH4	26.4	0	-2.29883	34.8093	2,4,5-Trichloro-2,5-cyclohexadiene-1-ol; 1-Hydroxyl-2,4,5-trichloro-2,5-cyclohexadiene;	215.974	NA	0.739817	1	map00361 Chlorocyclohexane and chlorobenzene degradation; map01120 Microbial metabolism in diverse environments	down
0.74_262.8905m/z	1.61728	0.00177988	0.00287947	0.343567	2.23559	CaseC:Control	C02466	C02466	H3O9P3	M+Na	37.4	0	9.69495	97.8211	Trimetaphosphoric acid; Trimetaphosphate; cyclo-Triphosphoric acid;	262.891	NA	0.739817	1	NULL	up
0.77_277.9731m/z	0.751303	0.0360386	0.0630128	0.747906	2.00233	CaseC:Control	NA	NULL	NA	NA	NA	NA	NA	NA	NA	NA	NA	NA	NA	NULL	down
0.77_361.8710m/z	1.55189	0.00045	0.000487	0.184054	2.45681	CaseC:Control	NA	NULL	NA	NA	NA	NA	NA	NA	NA	NA	NA	NA	NA	NULL	up
0.88_380.0030m/z	0.503775	0.00054	0.00105003	0.238043	3.6932	CaseC:Control	NA	NULL	NA	NA	NA	NA	NA	NA	NA	NA	NA	NA	NA	NULL	down
0.91_360.9409m/z	1.25652	0.0109974	0.00684146	0.462973	1.71191	CaseC:Control	NA	NULL	NA	NA	NA	NA	NA	NA	NA	NA	NA	NA	NA	NULL	up
0.91_572.8619m/z	1.2398	0.0273408	0.0288056	0.653022	1.34801	CaseC:Control	NA	NULL	NA	NA	NA	NA	NA	NA	NA	NA	NA	NA	NA	NULL	up
0.93_324.0144m/z	0.828154	0.00965172	0.0114962	0.482629	1.40264	CaseC:Control	C15249	C15249	C13H13Cl2NO3	M+Na	31.3	8.53	-6.84622	55.7695	2-(3,5-Dichlorophenylcarbamoyl)-1,2-dimethylcyclopropane-1-carboxylic acid;	324.014	NA	0.925533	1	NULL	down
0.93_409.9472m/z	1.22369	0.0286424	0.0288056	0.653022	1.58917	CaseC:Control	NA	NULL	NA	NA	NA	NA	NA	NA	NA	NA	NA	NA	NA	NULL	up
0.94_282.9972m/z	0.826884	0.00481109	0.0185434	0.549514	1.68194	CaseC:Control	C18741	C18741	C11H13ClO2S	M+K	33.7	6.68	6.51592	69.0666	MCPA-thioethyl;	282.997	NA	0.939817	1	NULL	down
0.94_282.9972m/z	0.826884	0.00481109	0.0185434	0.549514	1.68194	CaseC:Control	C01131	C01131	C6H13O8P	M+K	38.6	0	-3.01412	96.6002	L-Rhamnulose 1-phosphate;	282.997	NA	0.939817	1	map00051 Fructose and mannose metabolism; map01120 Microbial metabolism in diverse environments	down
0.94_282.9972m/z	0.826884	0.00481109	0.0185434	0.549514	1.68194	CaseC:Control	C02985	C02985	C6H13O8P	M+K	38.6	0.208	-3.01412	96.6002	L-Fucose 1-phosphate; 6-Deoxy-L-galactose 1-phosphate; beta-L-Fucose 1-phosphate;	282.997	NA	0.939817	1	map00051 Fructose and mannose metabolism; map00520 Amino sugar and nucleotide sugar metabolism; map01100 Metabolic pathways	down
0.94_282.9972m/z	0.826884	0.00481109	0.0185434	0.549514	1.68194	CaseC:Control	C01099	C01099	C6H13O8P	M+K	38.6	0	-3.01412	96.6002	L-Fuculose 1-phosphate;	282.997	NA	0.939817	1	map00051 Fructose and mannose metabolism; map01120 Microbial metabolism in diverse environments	down
0.94_282.9972m/z	0.826884	0.00481109	0.0185434	0.549514	1.68194	CaseC:Control	C06369	C06369	C6H13O8P	M+K	38.6	0	-3.01412	96.6002	2-Deoxy-D-glucose 6-phosphate;	282.997	NA	0.939817	1	NULL	down
0.94_291.9885m/z	0.820061	0.0467143	0.0524259	0.726908	1.43435	CaseC:Control	C05720	C05720	C12H9Cl2NO2	M+Na	28.3	1.36	-6.50559	47.4751	Reduced 2,6-Dichlorophenolindophenol; 2,6-Dichloro-4-[(4-hydroxyphenyl)amino]-phenol;	291.989	NA	0.939817	1	NULL	down
0.94_291.9885m/z	0.820061	0.0467143	0.0524259	0.726908	1.43435	CaseC:Control	C04798	C04798	C10H8ClN3O3	M+K	37.1	26.8	-0.285769	58.9278	5-Amino-4-chloro-2-(2,3-dihydroxyphenyl)-3(2H)-pyridazinone; Chloridazon catechol; 5-Amino-4-chloro-2-(2',3'-dihydroxyphenyl)-3(2H)-pyridazinone;	291.989	NA	0.939817	1	NULL	down
0.95_204.1236m/z	1.264	0.0240169	0.0185434	0.549514	1.79673	CaseC:Control	C02029	C02029	C10H15N5O	M+H-H2O	38.8	0	-3.3295	97.7027	Dihydrozeatin; 2-Methyl-4-(1H-purin-6-ylamino)butan-1-ol; N6-(4-Hydroxyisopentanyl)adenine;	204.124	NA	0.9541	1	map00908 Zeatin biosynthesis; map01110 Biosynthesis of secondary metabolites; map04075 Plant hormone signal transduction	up
0.95_204.1236m/z	1.264	0.0240169	0.0185434	0.549514	1.79673	CaseC:Control	C04083	C04083	C10H13N5	M+H	38.7	0	-3.62472	97.9388	N6-(delta2-Isopentenyl)-adenine; N6-(3-Methylbut-2-enyl)adenine; 6-(gamma,gamma-Dimethylallylamino)purine; N6-Dimethylallyladenine;	204.124	NA	0.9541	1	map00908 Zeatin biosynthesis; map01110 Biosynthesis of secondary metabolites; map04075 Plant hormone signal transduction	up
0.95_204.1236m/z	1.264	0.0240169	0.0185434	0.549514	1.79673	CaseC:Control	C08435	C08435	C10H13N5	M+H	38.7	0	-3.62472	97.9388	Triacanthine;	204.124	NA	0.9541	1	NULL	up
0.95_204.1236m/z	1.264	0.0240169	0.0185434	0.549514	1.79673	CaseC:Control	C14112	C14112	C9H14O4	M+NH4	56	84.9	3.23056	99.096	cis-2-Carboxycyclohexyl-acetic acid;	204.124	NA	0.9541	1	map00626 Naphthalene degradation; map01120 Microbial metabolism in diverse environments	up
1.07_102.1288m/z	0.60282	0.0299674	0.0288056	0.653022	1.31478	CaseC:Control	NA	NULL	NA	NA	NA	NA	NA	NA	NA	NA	NA	NA	NA	NULL	down
10.08_865.2676m/z	1.68022	0.0362005	0.0892096	0.815476	2.29023	CaseC:Control	NA	NULL	NA	NA	NA	NA	NA	NA	NA	NA	NA	NA	NA	NULL	up
10.88_155.0859m/z	0.641688	0.0218344	0.0288056	0.653022	2.26037	CaseC:Control	C16928	C16928	C12H12O	M+H-H2O	38.7	7.28	2.10314	88.7887	Capillone; 1-Phenyl-2,4-hexadiene-1-one;	155.086	NA	10.8823	1	NULL	down
10.88_155.0859m/z	0.641688	0.0218344	0.0288056	0.653022	2.26037	CaseC:Control	C06588	C06588	C12H10	M+H	38.7	7.51	2.34899	88.8897	Biphenyl; Phenylbenzene; 1,1'-Biphenyl; 1,1'-Diphenyl;	155.086	NA	10.8823	1	map00621 Dioxin degradation; map01100 Metabolic pathways; map01120 Microbial metabolism in diverse environments; map01220 Degradation of aromatic compounds	down
10.88_155.0859m/z	0.641688	0.0218344	0.0288056	0.653022	2.26037	CaseC:Control	C19312	C19312	C12H10	M+H	38.7	7.51	2.34899	88.8897	Acenaphthene;	155.086	NA	10.8823	1	NULL	down
10.88_155.0859m/z	0.641688	0.0218344	0.0288056	0.653022	2.26037	CaseC:Control	C16927	C16927	C12H10	M+H	38.7	7.49	2.34899	88.8897	Capillene;	155.086	NA	10.8823	1	NULL	down
11.16_623.2926m/z	0.649789	0.0338787	0.0288056	0.653022	2.78273	CaseC:Control	C11979	C11979	C34H48O8	M+K	42.7	32.9	-9.31072	91.0337	Avermectin B1a aglycone;	623.293	NA	11.1617	1	map00522 Biosynthesis of 12-, 14- and 16-membered macrolides; map01130 Biosynthesis of antibiotics	down
11.16_623.2926m/z	0.649789	0.0338787	0.0288056	0.653022	2.78273	CaseC:Control	C11964	C11964	C34H48O8	M+K	42.7	32.7	-9.31072	91.0337	Avermectin A1b aglycone;	623.293	NA	11.1617	1	map00522 Biosynthesis of 12-, 14- and 16-membered macrolides; map01130 Biosynthesis of antibiotics	down
11.16_623.2926m/z	0.649789	0.0338787	0.0288056	0.653022	2.78273	CaseC:Control	C09108	C09108	C34H48O8	M+K	36.6	2.26	-9.31072	91.0337	Huratoxin;	623.293	NA	11.1617	1	NULL	down
11.93_318.9574m/z	0.81327	0.0382802	0.0185434	0.549514	1.65536	CaseC:Control	NA	NULL	NA	NA	NA	NA	NA	NA	NA	NA	NA	NA	NA	NULL	down
3.46_505.2259m/z	1.50771	0.0263183	0.0630128	0.747906	2.21127	CaseC:Control	C15674	C15674	C25H33N3O3S2	M+NH4	34	0	-8.79058	79.6292	Myxothiazol A;	505.226	NA	3.4629	1	NULL	up
3.56_297.1451m/z	0.330811	0.0145146	0.0185434	0.549514	4.23964	CaseC:Control	C17560	C17560	C12H14O3.[C5H8]n	M+Na	19.6	2.55	-3.76075	NA	2-Polyprenyl-6-methoxy-1,4-benzoquinone;	297.145	NA	3.5629	1	map00130 Ubiquinone and other terpenoid-quinone biosynthesis; map01100 Metabolic pathways; map01110 Biosynthesis of secondary metabolites	down
3.56_297.1451m/z	0.330811	0.0145146	0.0185434	0.549514	4.23964	CaseC:Control	C18131	C18131	C17H22O3	M+Na	35.6	0	-3.76075	82.4831	Geranyl-hydroxybenzoate;	297.145	NA	3.5629	1	map00130 Ubiquinone and other terpenoid-quinone biosynthesis; map01110 Biosynthesis of secondary metabolites	down
3.56_297.1451m/z	0.330811	0.0145146	0.0185434	0.549514	4.23964	CaseC:Control	C09171	C09171	C17H22O3	M+Na	36.1	2.55	-3.76075	82.4831	Podocarpic acid;	297.145	NA	3.5629	1	NULL	down
3.56_297.1451m/z	0.330811	0.0145146	0.0185434	0.549514	4.23964	CaseC:Control	C05848	C05848	C12H14O3.[C5H8]n	M+Na	19.1	0	-3.76075	NA	4-Hydroxy-3-polyprenylbenzoate;	297.145	NA	3.5629	1	map00130 Ubiquinone and other terpenoid-quinone biosynthesis; map01100 Metabolic pathways; map01110 Biosynthesis of secondary metabolites	down
3.56_297.1451m/z	0.330811	0.0145146	0.0185434	0.549514	4.23964	CaseC:Control	C14660	C14660	C17H22O3	M+Na	36.1	2.55	-3.76075	82.4831	Carbestrol; 3-Ethyl-4-(p-methoxyphenyl)-2-methyl-3-cyclohexene-1-carboxylic acid;	297.145	NA	3.5629	1	NULL	down
3.56_297.1451m/z	0.330811	0.0145146	0.0185434	0.549514	4.23964	CaseC:Control	C14260	C14260	C14H26O4	M+K	35.9	0	-4.58273	84.9415	Diisobutyl adipate;	297.145	NA	3.5629	1	NULL	down
3.56_297.1451m/z	0.330811	0.0145146	0.0185434	0.549514	4.23964	CaseC:Control	C14253	C14253	C14H26O4	M+K	35.9	0	-4.58273	84.9415	Dibutyl adipate; Di-n-butyl adipate;	297.145	NA	3.5629	1	NULL	down
3.69_318.1659m/z	2.02746	0.0156036	0.0146896	0.520335	3.32205	CaseC:Control	C07792	C07792	C17H25N3O2S	M+H-H2O	33.9	0	7.27347	77.6098	Naratriptan;	318.166	NA	3.69148	1	NULL	up
3.69_318.1659m/z	2.02746	0.0156036	0.0146896	0.520335	3.32205	CaseC:Control	C06980	C06980	C16H25NO4	M+Na	35.3	0	-5.696	82.8437	Esmolol;	318.166	NA	3.69148	1	NULL	up
3.69_318.1659m/z	2.02746	0.0156036	0.0146896	0.520335	3.32205	CaseC:Control	C09899	C09899	C16H25NO4	M+Na	35.3	0	-5.696	82.8437	Serratanidine;	318.166	NA	3.69148	1	NULL	up
3.81_316.1500m/z	1.74823	0.0108145	0.0114962	0.482629	3.07818	CaseC:Control	C17364	C17364	C13H21N3O6	M+H	39.2	0	-0.962112	97.2516	Clavamycin D;	316.15	NA	3.81222	1	NULL	up
3.81_316.1500m/z	1.74823	0.0108145	0.0114962	0.482629	3.07818	CaseC:Control	C17619	C17619	C17H18N2OS	M+NH4	36.5	0	7.37603	90.8615	10-(beta-Dimethylaminopropionyl)phenothiazine;	316.15	NA	3.81222	1	NULL	up
3.81_316.1500m/z	1.74823	0.0108145	0.0114962	0.482629	3.07818	CaseC:Control	C20674	C20674	C11H16N5O5+	M+NH4	38.5	0	3.4868	96.3588	N7-Methylguanosine;	316.15	NA	3.81222	1	NULL	up
3.83_405.1982m/z	1.83885	0.000148	4.33e-05	0.0654413	3.0997	CaseC:Control	C02010	C02010	C17H26N8O5	M+H-H2O	38.3	0	-2.58975	94.7924	Blasticidin S;	405.198	NA	3.8265	1	NULL	up
3.83_405.1982m/z	1.83885	0.000148	4.33e-05	0.0654413	3.0997	CaseC:Control	C15322	C15322	C22H32F2O2	M+K	37.4	0	-5.35299	93.0907	2alpha,3alpha-(Difluoromethylene)-5alpha-androstan-17beta-ol acetate;	405.198	NA	3.8265	1	NULL	up
3.90_417.0209m/z	1.5739	0.0294319	0.0432571	0.702966	2.82252	CaseC:Control	NA	NULL	NA	NA	NA	NA	NA	NA	NA	NA	NA	NA	NA	NULL	up
3.96_144.0661m/z	0.662947	0.0355451	0.035463	0.675585	2.41357	CaseC:Control	C01077	C01077	C6H11NO4	M+H-H2O	35.2	0	3.60657	80.2913	O-Acetyl-L-homoserine; O-Acetylhomoserine;	144.066	NA	3.95508	1	map00270 Cysteine and methionine metabolism; map01100 Metabolic pathways; map01130 Biosynthesis of antibiotics	down
3.96_144.0661m/z	0.662947	0.0355451	0.035463	0.675585	2.41357	CaseC:Control	C05016	C05016	C6H11NO4	M+H-H2O	35.2	0	3.60657	80.2913	L-Glutamate methylester;	144.066	NA	3.95508	1	NULL	down
3.96_144.0661m/z	0.662947	0.0355451	0.035463	0.675585	2.41357	CaseC:Control	C06234	C06234	C6H11NO4	M+H-H2O	35.2	0	3.60657	80.2913	4-Methyl-L-glutamate;	144.066	NA	3.95508	1	map00660 C5-Branched dibasic acid metabolism	down
3.96_144.0661m/z	0.662947	0.0355451	0.035463	0.675585	2.41357	CaseC:Control	C00956	C00956	C6H11NO4	M+H-H2O	35.2	0	3.60657	80.2913	L-2-Aminoadipate; L-alpha-Aminoadipate; L-alpha-Aminoadipic acid; L-2-Aminoadipic acid; L-2-Aminohexanedioate;	144.066	NA	3.95508	1	map00300 Lysine biosynthesis; map00310 Lysine degradation; map00311 Penicillin and cephalosporin biosynthesis; map01100 Metabolic pathways; map01110 Biosynthesis of secondary metabolites; map01130 Biosynthesis of antibiotics; map01210 2-Oxocarboxylic acid metabolism; map01230 Biosynthesis of amino acids	down
3.96_144.0661m/z	0.662947	0.0355451	0.035463	0.675585	2.41357	CaseC:Control	C02207	C02207	C6H11NO4	M+H-H2O	35.2	0	3.60657	80.2913	beta-Alanopine; N-(D-1-Carboxyethyl)-beta-alanine;	144.066	NA	3.95508	1	NULL	down
3.96_144.0661m/z	0.662947	0.0355451	0.035463	0.675585	2.41357	CaseC:Control	C01046	C01046	C6H11NO4	M+H-H2O	35.2	0	3.60657	80.2913	N-Methyl-L-glutamate; N-Methyl-L-glutamic acid;	144.066	NA	3.95508	1	map00680 Methane metabolism; map01120 Microbial metabolism in diverse environments	down
3.96_144.0661m/z	0.662947	0.0355451	0.035463	0.675585	2.41357	CaseC:Control	C17581	C17581	C6H11NO4	M+H-H2O	35.2	0	3.60657	80.2913	3-Amino-2,3-dideoxy-scyllo-inosose; 2-Deoxy-3-keto-scyllo-inosamine;	144.066	NA	3.95508	1	map00524 Butirosin and neomycin biosynthesis; map01130 Biosynthesis of antibiotics	down
3.96_144.0661m/z	0.662947	0.0355451	0.035463	0.675585	2.41357	CaseC:Control	C03210	C03210	C6H11NO4	M+H-H2O	35.2	0	3.60657	80.2913	Alanopine; 2,2'-Iminodipropanoate; meso-N-(1-Carboxyethyl)-alanine;	144.066	NA	3.95508	1	NULL	down
3.96_144.0661m/z	0.662947	0.0355451	0.035463	0.675585	2.41357	CaseC:Control	C19694	C19694	C6H11NO4	M+H-H2O	35.2	0	3.60657	80.2913	D-Alanyl-(R)-lactate; D-Alanyl-D-lactate; (2R)-2-(D-Alanyloxy)propanoic acid; (R)-2-[(R)-2-Aminopropanoyloxy]propanoic acid;	144.066	NA	3.95508	1	map01502 Vancomycin resistance	down
3.96_144.0661m/z	0.662947	0.0355451	0.035463	0.675585	2.41357	CaseC:Control	C17357	C17357	C6H9NO3	M+H	35.1	0	4.06063	80.3719	2-Hydroxymethylclavam;	144.066	NA	3.95508	1	map01130 Biosynthesis of antibiotics	down
3.96_144.0661m/z	0.662947	0.0355451	0.035463	0.675585	2.41357	CaseC:Control	C20718	C20718	C6H6O3	M+NH4	34.9	0	4.60924	80.0879	4-Hydroxy-5-methyl-2-methylenefuran-3(2H)-one;	144.066	NA	3.95508	1	NULL	down
3.96_144.0661m/z	0.662947	0.0355451	0.035463	0.675585	2.41357	CaseC:Control	C01108	C01108	C6H6O3	M+NH4	34.9	0	4.60924	80.0879	1,2,3-Trihydroxybenzene; Pyrogallol; Pyrogallic acid; 1,2,3-Benzenetriol;	144.066	NA	3.95508	1	map00627 Aminobenzoate degradation; map01120 Microbial metabolism in diverse environments; map07216 Catecholamine transferase inhibitors	down
3.96_144.0661m/z	0.662947	0.0355451	0.035463	0.675585	2.41357	CaseC:Control	C02814	C02814	C6H6O3	M+NH4	34.9	0	4.60924	80.0879	Benzene-1,2,4-triol; Hydroxyhydroquinone; 1,2,4-Benzenetriol; 1,2,4-Trihydroxybenzene; Hydroxyquinol;	144.066	NA	3.95508	1	map00361 Chlorocyclohexane and chlorobenzene degradation; map00362 Benzoate degradation; map00627 Aminobenzoate degradation; map01100 Metabolic pathways; map01120 Microbial metabolism in diverse environments	down
3.96_144.0661m/z	0.662947	0.0355451	0.035463	0.675585	2.41357	CaseC:Control	C02183	C02183	C6H6O3	M+NH4	34.9	0	4.60924	80.0879	Phloroglucinol; 1,3,5-Benzenetriol; 1,3,5-Trihydroxybenzene;	144.066	NA	3.95508	1	map00627 Aminobenzoate degradation; map01120 Microbial metabolism in diverse environments	down
3.96_144.0661m/z	0.662947	0.0355451	0.035463	0.675585	2.41357	CaseC:Control	C02752	C02752	C6H6O3	M+NH4	34.9	0	4.60924	80.0879	Triacetate lactone; 4-Hydroxy-6-methyl-2-pyrone;	144.066	NA	3.95508	1	NULL	down
3.96_144.0661m/z	0.662947	0.0355451	0.035463	0.675585	2.41357	CaseC:Control	C11918	C11918	C6H6O3	M+NH4	34.9	0	4.60924	80.0879	Maltol;	144.066	NA	3.95508	1	map00523 Polyketide sugar unit biosynthesis; map01130 Biosynthesis of antibiotics	down
3.96_144.0661m/z	0.662947	0.0355451	0.035463	0.675585	2.41357	CaseC:Control	C11101	C11101	C6H6O3	M+NH4	34.9	0	4.60924	80.0879	5-Hydroxymethyl-2-furaldehyde; HMF; 5-Hydroxymethylfurfural;	144.066	NA	3.95508	1	map00365 Furfural degradation; map01120 Microbial metabolism in diverse environments	down
3.97_470.6997m/z	1.48021	0.00389519	0.00388621	0.374895	2.22747	CaseC:Control	C02817	C02817	C10H2Cl10O	M+H-H2O	19.2	0	8.01268	5.1411	Chlordecone alcohol;	470.7	NA	3.96937	1	NULL	up
3.97_470.6997m/z	1.48021	0.00389519	0.00388621	0.374895	2.22747	CaseC:Control	C18446	C18446	C10Cl10	M+H	19.2	0	8.31994	5.15114	Dienochlor;	470.7	NA	3.96937	1	NULL	up
4.04_459.7349n	1.78294	0.012895	0.0114962	0.482629	3.09195	CaseC:Control	NA	NULL	NA	NA	NA	NA	NA	NA	NA	NA	NA	NA	NA	NULL	up
4.04_481.9985m/z	1.65527	0.0104155	0.0114962	0.482629	2.9244	CaseC:Control	C13072	C13072	C18H13NNa2O8S2	M+H	33.7	0	7.20727	76.5502	Sodium picosulfate;	481.999	NA	4.0408	1	NULL	up
4.04_495.2265m/z	1.65579	0.0192515	0.0432571	0.702966	2.80581	CaseC:Control	C08784	C08784	C25H34O10	M+H	33.1	0.216	8.1632	74.2987	Soularubinone;	495.227	NA	4.0408	1	NULL	up
4.04_495.2265m/z	1.65579	0.0192515	0.0432571	0.702966	2.80581	CaseC:Control	C08763	C08763	C25H34O10	M+H	33.1	0.216	8.1632	74.2987	Glaucarubinone;	495.227	NA	4.0408	1	NULL	up
4.04_495.2265m/z	1.65579	0.0192515	0.0432571	0.702966	2.80581	CaseC:Control	C20134	C20134	C25H32ClNO6	M+NH4	30.9	0	1.81712	56.6628	19-Chloroproansamitocin;	495.227	NA	4.0408	1	map01051 Biosynthesis of ansamycins; map01130 Biosynthesis of antibiotics	up
4.04_495.4772m/z	1.96392	0.00290776	0.00519604	0.420694	3.66851	CaseC:Control	NA	NULL	NA	NA	NA	NA	NA	NA	NA	NA	NA	NA	NA	NULL	up
4.04_570.3022m/z	1.82811	0.0386757	0.0432571	0.702966	3.10581	CaseC:Control	C15842	C15842	C32H45NO9	M+H-H2O	41.9	44.4	-6.77042	72.8966	Lipomycin; alpha-Lipomycin;	570.302	NA	4.0408	1	NULL	up
4.04_570.3022m/z	1.82811	0.0386757	0.0432571	0.702966	3.10581	CaseC:Control	C17613	C17613	C32H40O8	M+NH4	41.5	42.4	-7.19994	73.3814	Handelin;	570.302	NA	4.0408	1	NULL	up
4.04_570.3022m/z	1.82811	0.0386757	0.0432571	0.702966	3.10581	CaseC:Control	C10000	C10000	C33H36N4O4	M+NH4	32.3	0	-9.62157	72.2743	Canthiumine;	570.302	NA	4.0408	1	NULL	up
4.04_642.9964m/z	1.63527	0.0154135	0.0114962	0.482629	2.88849	CaseC:Control	NA	NULL	NA	NA	NA	NA	NA	NA	NA	NA	NA	NA	NA	NULL	up
4.04_659.3312n	1.71657	0.0106595	0.0114962	0.482629	3.02708	CaseC:Control	NA	NULL	NA	NA	NA	NA	NA	NA	NA	NA	NA	NA	NA	NULL	up
4.04_659.6654n	1.68321	0.00886955	0.0114962	0.482629	2.99522	CaseC:Control	NA	NULL	NA	NA	NA	NA	NA	NA	NA	NA	NA	NA	NA	NULL	up
4.06_459.2326n	1.64917	0.00921555	0.0114962	0.482629	2.91504	CaseC:Control	NA	NULL	NA	NA	NA	NA	NA	NA	NA	NA	NA	NA	NA	NULL	up
4.06_459.4833n	1.68054	0.0124917	0.0146896	0.520335	2.91151	CaseC:Control	NA	NULL	NA	NA	NA	NA	NA	NA	NA	NA	NA	NA	NA	NULL	up
4.06_613.3172m/z	2.08447	0.00790924	0.0114962	0.482629	3.49266	CaseC:Control	C08684	C08684	C33H46N2O10	M+H-H2O	32.8	0	8.25561	73.1938	Finaconitine;	613.317	NA	4.05508	1	NULL	up
4.07_623.6563m/z	1.90745	0.00415281	0.00287947	0.343567	2.62253	CaseC:Control	NA	NULL	NA	NA	NA	NA	NA	NA	NA	NA	NA	NA	NA	NULL	up
4.23_389.2550m/z	0.717392	0.0223861	0.0524259	0.726908	1.74957	CaseC:Control	C06847	C06847	C24H34N2O	M+Na	34.5	0	-3.72925	77.0604	Bepridil;	389.255	NA	4.23297	1	NULL	down
4.26_174.0917m/z	0.237125	0.0302242	0.0524259	0.726908	4.21258	CaseC:Control	C17902	C17902	C11H13NO2	M+H-H2O	38.9	0	1.96133	96.6181	Ephedroxane;	174.092	NA	4.26153	1	NULL	down
4.26_174.0917m/z	0.237125	0.0302242	0.0524259	0.726908	4.21258	CaseC:Control	C18487	C18487	C11H11NO	M+H	38.8	0	2.16543	96.7427	Pyroquilon;	174.092	NA	4.26153	1	NULL	down
4.26_174.0917m/z	0.237125	0.0302242	0.0524259	0.726908	4.21258	CaseC:Control	C12346	C12346	C11H11NO	M+H	38.8	0	2.16543	96.7427	1,3-Dimethyl-8-isoquinolinol;	174.092	NA	4.26153	1	NULL	down
4.26_174.0917m/z	0.237125	0.0302242	0.0524259	0.726908	4.21258	CaseC:Control	C14090	C14090	C11H8O	M+NH4	38.7	0	2.40171	96.4387	1-Naphthaldehyde; 1-Formylnaphthalene;	174.092	NA	4.26153	1	map00626 Naphthalene degradation; map01120 Microbial metabolism in diverse environments; map01220 Degradation of aromatic compounds	down
4.26_174.0917m/z	0.237125	0.0302242	0.0524259	0.726908	4.21258	CaseC:Control	C14099	C14099	C11H8O	M+NH4	38.7	0	2.40171	96.4387	2-Naphthaldehyde; 2-Naphthalenecarboxaldehyde;	174.092	NA	4.26153	1	map00626 Naphthalene degradation; map01120 Microbial metabolism in diverse environments; map01220 Degradation of aromatic compounds	down
4.26_188.1079m/z	0.293028	0.0121888	0.0432571	0.702966	4.44389	CaseC:Control	C10846	C10846	C12H15NO2	M+H-H2O	57.2	94.6	4.3893	96.7301	Bellendine;	188.108	NA	4.26153	1	NULL	down
4.26_188.1079m/z	0.293028	0.0121888	0.0432571	0.702966	4.44389	CaseC:Control	C14224	C14224	C12H10O	M+NH4	54.4	81.6	5.29357	96.5567	4-Hydroxybiphenyl; 4-Phenylphenol;	188.108	NA	4.26153	1	NULL	down
4.26_188.1079m/z	0.293028	0.0121888	0.0432571	0.702966	4.44389	CaseC:Control	C14342	C14342	C12H10O	M+NH4	54.4	81.6	5.29357	96.5567	3-Hydroxybiphenyl; 3-Phenylphenol;	188.108	NA	4.26153	1	NULL	down
4.26_188.1079m/z	0.293028	0.0121888	0.0432571	0.702966	4.44389	CaseC:Control	C02499	C02499	C12H10O	M+NH4	54.4	81.6	5.29357	96.5567	2-Hydroxybiphenyl; Orthophenyl phenol; 2-Biphenylol; 2-Phenylphenol;	188.108	NA	4.26153	1	NULL	down
4.32_580.6223m/z	1.61798	0.0292415	0.0432571	0.702966	2.77827	CaseC:Control	NA	NULL	NA	NA	NA	NA	NA	NA	NA	NA	NA	NA	NA	NULL	up
4.32_580.9567m/z	1.5321	0.0243968	0.0185434	0.549514	2.45942	CaseC:Control	NA	NULL	NA	NA	NA	NA	NA	NA	NA	NA	NA	NA	NA	NULL	up
4.40_193.0747n	1.5121	0.0420829	0.075256	0.77902	2.52529	CaseC:Control	C16587	C16587	C10H11NO3	M+H, M+Na	38.5	0	3.98749	97.3459	3-Carbamoyl-2-phenylpropionaldehyde;	194.082	193.075	4.4044	1	map00982 Drug metabolism - cytochrome P450	up
4.40_193.0747n	1.5121	0.0420829	0.075256	0.77902	2.52529	CaseC:Control	C10581	C10581	C10H11NO3	M+H, M+Na	38.5	0	3.98749	97.3459	Cichorine;	194.082	193.075	4.4044	1	NULL	up
4.40_193.0747n	1.5121	0.0420829	0.075256	0.77902	2.52529	CaseC:Control	C09962	C09962	C10H11NO3	M+H, M+Na	38.5	0	3.98749	97.3459	Gentioflavine;	194.082	193.075	4.4044	1	NULL	up
4.40_193.0747n	1.5121	0.0420829	0.075256	0.77902	2.52529	CaseC:Control	C05598	C05598	C10H11NO3	M+H, M+Na	38.5	0	3.98749	97.3459	Phenylacetylglycine;	194.082	193.075	4.4044	1	map00360 Phenylalanine metabolism	up
4.40_193.0747n	1.5121	0.0420829	0.075256	0.77902	2.52529	CaseC:Control	C03450	C03450	C10H11NO3	M+H, M+Na	38.5	0	3.98749	97.3459	(3-Arylcarbonyl)-alanine;	194.082	193.075	4.4044	1	NULL	up
4.40_193.0747n	1.5121	0.0420829	0.075256	0.77902	2.52529	CaseC:Control	C06726	C06726	C10H11NO3	M+H, M+Na	38.5	0	3.98749	97.3459	5,6-Dihydroxy-3-methyl-2-oxo-1,2,5,6-tetrahydroquinoline;	194.082	193.075	4.4044	1	NULL	up
4.40_193.0747n	1.5121	0.0420829	0.075256	0.77902	2.52529	CaseC:Control	C16595	C16595	C10H11NO3	M+H, M+Na	38.5	0	3.98749	97.3459	4-Hydroxy-5-phenyltetrahydro-1,3-oxazin-2-one;	194.082	193.075	4.4044	1	map00982 Drug metabolism - cytochrome P450	up
4.40_292.9993n	1.78093	0.0446938	0.0892096	0.815476	3.51656	CaseC:Control	NA	NULL	NA	NA	NA	NA	NA	NA	NA	NA	NA	NA	NA	NULL	up
4.40_91.0558m/z	1.44116	0.0377983	0.035463	0.675585	2.51806	CaseC:Control	NA	NULL	NA	NA	NA	NA	NA	NA	NA	NA	NA	NA	NA	NULL	up
4.46_394.2317m/z	0.755748	0.00319349	0.00684146	0.462973	2.34	CaseC:Control	C03887	C03887	C21H27N7O	M+H	36.4	0	-8.444	91.1597	Oxidized Cypridina luciferin;	394.232	NA	4.46155	1	NULL	down
4.46_394.2317m/z	0.755748	0.00319349	0.00684146	0.462973	2.34	CaseC:Control	C06977	C06977	C20H28N2O5	M+NH4	36.6	0	-5.27113	88.9922	Enalapril;	394.232	NA	4.46155	1	NULL	down
4.46_394.2317m/z	0.755748	0.00319349	0.00684146	0.462973	2.34	CaseC:Control	C08021	C08021	C20H28N2O5	M+NH4	36.6	0	-5.27113	88.9922	Remifentanil;	394.232	NA	4.46155	1	NULL	down
4.51_290.9627n	1.42689	0.00650428	0.0089307	0.482629	2.10173	CaseC:Control	NA	NULL	NA	NA	NA	NA	NA	NA	NA	NA	NA	NA	NA	NULL	up
4.51_314.9866m/z	2.91684	0.00742306	0.00684146	0.462973	4.79391	CaseC:Control	C00345	C00345	C6H13O10P	M+K	37.2	0	-4.26074	91.0126	6-Phospho-D-gluconate;	314.987	NA	4.51085	1	map00030 Pentose phosphate pathway; map01100 Metabolic pathways; map01110 Biosynthesis of secondary metabolites; map01120 Microbial metabolism in diverse environments; map01130 Biosynthesis of antibiotics; map01200 Carbon metabolism	up
4.51_314.9866m/z	2.91684	0.00742306	0.00684146	0.462973	4.79391	CaseC:Control	C04234	C04234	C6H13O10P	M+K	37.2	0	-4.26074	91.0126	2-Carboxy-D-arabinitol 1-phosphate; 2-Carboxyarabinitol 1-phosphate;	314.987	NA	4.51085	1	NULL	up
4.55_160.0764m/z	0.748389	0.0221066	0.035463	0.675585	1.76525	CaseC:Control	C00637	C00637	C10H9NO	M+H	38.7	0	4.56991	99.0117	Indole-3-acetaldehyde; 2-(Indol-3-yl)acetaldehyde; Indoleacetaldehyde;	160.076	NA	4.5537	1	map00380 Tryptophan metabolism; map01100 Metabolic pathways	down
4.55_160.0764m/z	0.748389	0.0221066	0.035463	0.675585	1.76525	CaseC:Control	C14789	C14789	C10H9NO	M+H	38.7	0	4.56991	99.0117	N-Hydroxy-1-aminonaphthalene; 1-Naphthylhydroxylamine;	160.076	NA	4.5537	1	map00980 Metabolism of xenobiotics by cytochrome P450	down
4.55_160.0764m/z	0.748389	0.0221066	0.035463	0.675585	1.76525	CaseC:Control	C06345	C06345	C10H9NO	M+H	38.7	0	4.56991	99.0117	3-Methyl-quinolin-2-ol;	160.076	NA	4.5537	1	NULL	down
4.55_160.0764m/z	0.748389	0.0221066	0.035463	0.675585	1.76525	CaseC:Control	C10663	C10663	C10H9NO	M+H	38.7	0	4.56991	99.0117	Echinopsine;	160.076	NA	4.5537	1	NULL	down
4.55_204.0660m/z	0.783572	0.0321593	0.035463	0.675585	1.47329	CaseC:Control	C05657	C05657	C11H11NO4	M+H-H2O	39.2	0	2.04399	98.2136	6-Hydroxyindolelactate;	204.066	NA	4.5537	1	NULL	down
4.55_204.0660m/z	0.783572	0.0321593	0.035463	0.675585	1.47329	CaseC:Control	C00331	C00331	C11H9NO3	M+H	39.2	0	2.22529	98.4729	Indolepyruvate; Indolepyruvic acid; (Indol-3-yl)pyruvate; Indole-3-pyruvate; 3-(Indol-3-yl)pyruvate;	204.066	NA	4.5537	1	map00380 Tryptophan metabolism; map01100 Metabolic pathways	down
4.55_204.0660m/z	0.783572	0.0321593	0.035463	0.675585	1.47329	CaseC:Control	C10127	C10127	C11H9NO3	M+H	39.2	0	2.22529	98.4729	Anibine;	204.066	NA	4.5537	1	NULL	down
4.55_204.0660m/z	0.783572	0.0321593	0.035463	0.675585	1.47329	CaseC:Control	C09305	C09305	C11H6O3	M+NH4	39.2	0	2.42897	98.7891	Psoralen; Ficusin;	204.066	NA	4.5537	1	map01061 Biosynthesis of phenylpropanoids; map01110 Biosynthesis of secondary metabolites	down
4.55_204.0660m/z	0.783572	0.0321593	0.035463	0.675585	1.47329	CaseC:Control	C09060	C09060	C11H6O3	M+NH4	39.2	0	2.42897	98.7891	Angelicin; Isopsoralen;	204.066	NA	4.5537	1	map01061 Biosynthesis of phenylpropanoids; map01110 Biosynthesis of secondary metabolites	down
4.58_147.0450m/z	0.526917	0.043279	0.0288056	0.653022	2.70805	CaseC:Control	C10945	C10945	C9H8O3	M+H-H2O	37.3	0	5.94916	93.5147	Caffeic aldehyde; 3,4-Dihydroxycinnamaldehyde; Caffeyl aldehyde;	147.045	NA	4.58228	1	map00940 Phenylpropanoid biosynthesis; map01110 Biosynthesis of secondary metabolites	down
4.58_147.0450m/z	0.526917	0.043279	0.0288056	0.653022	2.70805	CaseC:Control	C01772	C01772	C9H8O3	M+H-H2O	37.3	0	5.94916	93.5147	trans-2-Hydroxycinnamate; trans-2-Hydroxycinnamic acid; 2-Hydroxycinnamate; 2-Coumaric acid; o-Coumaric acid; 2-Coumarate;	147.045	NA	4.58228	1	map00360 Phenylalanine metabolism; map00940 Phenylpropanoid biosynthesis; map01110 Biosynthesis of secondary metabolites; map01120 Microbial metabolism in diverse environments	down
4.58_147.0450m/z	0.526917	0.043279	0.0288056	0.653022	2.70805	CaseC:Control	C02763	C02763	C9H8O3	M+H-H2O	37.3	0	5.94916	93.5147	2-Hydroxy-3-phenylpropenoate; enol-Phenylpyruvate; enol-Phenylpyruvic acid; enol-alpha-Ketohydrocinnamic acid;	147.045	NA	4.58228	1	map00360 Phenylalanine metabolism	down
4.58_147.0450m/z	0.526917	0.043279	0.0288056	0.653022	2.70805	CaseC:Control	C00166	C00166	C9H8O3	M+H-H2O	37.3	0	5.94916	93.5147	Phenylpyruvate; Phenylpyruvic acid; alpha-Ketohydrocinnamic acid; keto-Phenylpyruvate; 3-Phenyl-2-oxopropanoate; 2-Oxo-3-phenylpropanoate;	147.045	NA	4.58228	1	map00360 Phenylalanine metabolism; map00400 Phenylalanine, tyrosine and tryptophan biosynthesis; map00960 Tropane, piperidine and pyridine alkaloid biosynthesis; map01060 Biosynthesis of plant secondary metabolites; map01100 Metabolic pathways; map01110 Biosynthesis of secondary metabolites; map01130 Biosynthesis of antibiotics; map01210 2-Oxocarboxylic acid metabolism; map01230 Biosynthesis of a…	down
4.58_147.0450m/z	0.526917	0.043279	0.0288056	0.653022	2.70805	CaseC:Control	C07114	C07114	C9H8O3	M+H-H2O	37.3	0	5.94916	93.5147	3-Oxo-3-phenylpropanoate; Benzoylacetate; 3-Oxo-3-phenylpropionate; 3-Oxo-3-phenylpropionic acid;	147.045	NA	4.58228	1	map00642 Ethylbenzene degradation; map01120 Microbial metabolism in diverse environments; map01220 Degradation of aromatic compounds	down
4.58_147.0450m/z	0.526917	0.043279	0.0288056	0.653022	2.70805	CaseC:Control	C12621	C12621	C9H8O3	M+H-H2O	37.3	0	5.94916	93.5147	trans-3-Hydroxycinnamate; (2E)-3-(3-Hydroxyphenyl)prop-2-enoate;	147.045	NA	4.58228	1	map00360 Phenylalanine metabolism; map01120 Microbial metabolism in diverse environments; map01220 Degradation of aromatic compounds	down
4.58_147.0450m/z	0.526917	0.043279	0.0288056	0.653022	2.70805	CaseC:Control	C05838	C05838	C9H8O3	M+H-H2O	37.3	0	5.94916	93.5147	cis-2-Hydroxycinnamate; 2-Coumarinate;	147.045	NA	4.58228	1	map00940 Phenylpropanoid biosynthesis; map01110 Biosynthesis of secondary metabolites	down
4.58_147.0450m/z	0.526917	0.043279	0.0288056	0.653022	2.70805	CaseC:Control	C00811	C00811	C9H8O3	M+H-H2O	37.3	0	5.94916	93.5147	4-Coumarate; p-Coumaric acid; trans-4-Hydroxycinnamate; trans-p-Hydroxycinnamate; 4-Hydroxycinnamic acid; 4-Hydroxycinnamate;	147.045	NA	4.58228	1	map00130 Ubiquinone and other terpenoid-quinone biosynthesis; map00350 Tyrosine metabolism; map00360 Phenylalanine metabolism; map00940 Phenylpropanoid biosynthesis; map01061 Biosynthesis of phenylpropanoids; map01100 Metabolic pathways; map01110 Biosynthesis of secondary metabolites; map01220 Degradation of aromatic compounds	down
4.58_147.0450m/z	0.526917	0.043279	0.0288056	0.653022	2.70805	CaseC:Control	C06738	C06738	C9H8O3	M+H-H2O	37.3	0	5.94916	93.5147	cis-p-Coumarate;	147.045	NA	4.58228	1	NULL	down
4.58_147.0450m/z	0.526917	0.043279	0.0288056	0.653022	2.70805	CaseC:Control	C05851	C05851	C9H6O2	M+H	37.2	0	6.68287	93.6312	Coumarin; Coumarine; Cumarin; 2H-1-Benzopyran-2-one; 1,2-Benzopyrone; 2-Propenoic acid, 3-(2-hydroxyphenyl)-, delta-lactone; 5,6-Benzo-2-pyrone; Benzo-alpha-pyrone; cis-o-Coumarinic acid lactone; Coumarinic anhydride; o-Hydroxycinnamic acid lactone; Rattex; Tonka bean camphor;	147.045	NA	4.58228	1	map00940 Phenylpropanoid biosynthesis; map01110 Biosynthesis of secondary metabolites	down
4.60_577.7655m/z	1.43712	0.037237	0.0288056	0.653022	2.44477	CaseC:Control	NA	NULL	NA	NA	NA	NA	NA	NA	NA	NA	NA	NA	NA	NULL	up
4.63_260.1862m/z	1.6995	0.0172631	0.0232306	0.601873	3.33201	CaseC:Control	NA	NULL	NA	NA	NA	NA	NA	NA	NA	NA	NA	NA	NA	NULL	up
4.63_470.5080n	1.49826	0.00646524	0.00684146	0.462973	1.97043	CaseC:Control	NA	NULL	NA	NA	NA	NA	NA	NA	NA	NA	NA	NA	NA	NULL	up
4.63_482.8850m/z	1.55558	0.0114929	0.0146896	0.520335	2.77255	CaseC:Control	NA	NULL	NA	NA	NA	NA	NA	NA	NA	NA	NA	NA	NA	NULL	up
4.63_493.8645m/z	1.43274	0.0322243	0.035463	0.675585	1.9471	CaseC:Control	NA	NULL	NA	NA	NA	NA	NA	NA	NA	NA	NA	NA	NA	NULL	up
4.63_510.1990n	1.47556	0.00370709	0.00150469	0.262394	2.18625	CaseC:Control	NA	NULL	NA	NA	NA	NA	NA	NA	NA	NA	NA	NA	NA	NULL	up
4.63_712.8323m/z	1.45482	0.0046039	0.00388621	0.374895	2.23845	CaseC:Control	NA	NULL	NA	NA	NA	NA	NA	NA	NA	NA	NA	NA	NA	NULL	up
4.63_713.3338m/z	1.46557	0.00549351	0.00388621	0.374895	2.25941	CaseC:Control	C19986	C19986	C35H52O15	M+H	36	12	-5.69995	74.3937	Convalloside;	713.334	NA	4.62513	1	NULL	up
4.63_713.3338m/z	1.46557	0.00549351	0.00388621	0.374895	2.25941	CaseC:Control	C14540	C14540	C37H45NO12	M+NH4	35.5	13.9	8.39318	73.1321	Rifamycin S;	713.334	NA	4.62513	1	map01051 Biosynthesis of ansamycins; map01130 Biosynthesis of antibiotics; map07023 Rifamycins	up
4.63_713.3338m/z	1.46557	0.00549351	0.00388621	0.374895	2.25941	CaseC:Control	C08935	C08935	C37H54O11	M+K	34.9	7.71	6.03012	73.4992	Cimicifugoside;	713.334	NA	4.62513	1	NULL	up
4.63_739.2877m/z	1.66441	0.0135934	0.0232306	0.601873	2.51072	CaseC:Control	NA	NULL	NA	NA	NA	NA	NA	NA	NA	NA	NA	NA	NA	NULL	up
4.63_739.7891m/z	1.44227	0.0405013	0.035463	0.675585	1.87276	CaseC:Control	NA	NULL	NA	NA	NA	NA	NA	NA	NA	NA	NA	NA	NA	NULL	up
4.64_211.0973m/z	0.554886	0.0472218	0.0630128	0.747906	2.4833	CaseC:Control	C02726	C02726	C5H15N4O3P	M+H	36	0	8.74191	89.5617	Phosphoagmatine; Agmatine phosphate;	211.097	NA	4.63943	1	NULL	down
4.64_211.0973m/z	0.554886	0.0472218	0.0630128	0.747906	2.4833	CaseC:Control	C02325	C02325	C11H14O4	M+H	37.7	0	3.82996	93.1748	Sinapyl alcohol; Sinapoyl alcohol;	211.097	NA	4.63943	1	map00940 Phenylpropanoid biosynthesis; map01061 Biosynthesis of phenylpropanoids; map01100 Metabolic pathways; map01110 Biosynthesis of secondary metabolites	down
4.64_211.0973m/z	0.554886	0.0472218	0.0630128	0.747906	2.4833	CaseC:Control	C10709	C10709	C11H14O4	M+H	37.7	0	3.82996	93.1748	Multifidol;	211.097	NA	4.63943	1	NULL	down
4.64_211.0973m/z	0.554886	0.0472218	0.0630128	0.747906	2.4833	CaseC:Control	C07350	C07350	C11H14O4	M+H	37.7	0	3.82996	93.1748	Phlorisovalerophenone; 3-Methyl-1-(2,4,6-trihydroxyphenyl)butan-1-one;	211.097	NA	4.63943	1	NULL	down
4.64_211.0973m/z	0.554886	0.0472218	0.0630128	0.747906	2.4833	CaseC:Control	C02131	C02131	C7H16N4O	M+K	36.1	0	9.99673	91.5072	Acetylagmatine;	211.097	NA	4.63943	1	NULL	down
4.65_662.3085m/z	1.3944	0.00966342	0.0089307	0.482629	2.15551	CaseC:Control	NA	NULL	NA	NA	NA	NA	NA	NA	NA	NA	NA	NA	NA	NULL	up
4.65_662.8096m/z	1.41797	0.00480275	0.00388621	0.374895	2.24705	CaseC:Control	NA	NULL	NA	NA	NA	NA	NA	NA	NA	NA	NA	NA	NA	NULL	up
4.67_420.4260m/z	1.69354	0.0194945	0.035463	0.675585	2.34386	CaseC:Control	NA	NULL	NA	NA	NA	NA	NA	NA	NA	NA	NA	NA	NA	NULL	up
4.67_547.5836m/z	1.64133	0.00253409	0.00105003	0.238043	2.62514	CaseC:Control	NA	NULL	NA	NA	NA	NA	NA	NA	NA	NA	NA	NA	NA	NULL	up
4.67_549.5404n	1.69352	0.00852071	0.0089307	0.482629	2.8354	CaseC:Control	NA	NULL	NA	NA	NA	NA	NA	NA	NA	NA	NA	NA	NA	NULL	up
4.67_555.5770m/z	1.56526	0.00976461	0.0288056	0.653022	2.3097	CaseC:Control	NA	NULL	NA	NA	NA	NA	NA	NA	NA	NA	NA	NA	NA	NULL	up
4.67_560.9009m/z	1.96028	0.00554039	0.00519604	0.420694	3.49825	CaseC:Control	C19460	C19460	C12H24N4S8Se	M+H	20.1	0	0.741865	1.47371	Methyl selenac; Tetrakis(dimethyldithiocarbamato)-selenium;	560.901	NA	4.668	1	NULL	up
4.67_564.9209n	1.49496	0.00546943	0.0146896	0.520335	2.3292	CaseC:Control	NA	NULL	NA	NA	NA	NA	NA	NA	NA	NA	NA	NA	NA	NULL	up
4.67_571.9138n	1.5271	0.00800906	0.0114962	0.482629	2.43943	CaseC:Control	NA	NULL	NA	NA	NA	NA	NA	NA	NA	NA	NA	NA	NA	NULL	up
4.67_572.2479n	1.49205	0.00351469	0.00287947	0.343567	2.31022	CaseC:Control	NA	NULL	NA	NA	NA	NA	NA	NA	NA	NA	NA	NA	NA	NULL	up
4.67_577.2359n	1.49138	0.00676935	0.0146896	0.520335	2.30897	CaseC:Control	NA	NULL	NA	NA	NA	NA	NA	NA	NA	NA	NA	NA	NA	NULL	up
4.67_577.5700n	1.59086	0.00350724	0.00684146	0.462973	2.54088	CaseC:Control	NA	NULL	NA	NA	NA	NA	NA	NA	NA	NA	NA	NA	NA	NULL	up
4.67_581.8933n	1.74054	0.000457	0.00150469	0.262394	3.08764	CaseC:Control	NA	NULL	NA	NA	NA	NA	NA	NA	NA	NA	NA	NA	NA	NULL	up
4.67_582.2244n	1.48492	0.00608194	0.0232306	0.601873	2.33593	CaseC:Control	NA	NULL	NA	NA	NA	NA	NA	NA	NA	NA	NA	NA	NA	NULL	up
4.67_582.5587n	1.49367	0.00560858	0.0114962	0.482629	2.30607	CaseC:Control	NA	NULL	NA	NA	NA	NA	NA	NA	NA	NA	NA	NA	NA	NULL	up
4.67_723.8219m/z	1.7616	0.0125238	0.0232306	0.601873	2.78083	CaseC:Control	NA	NULL	NA	NA	NA	NA	NA	NA	NA	NA	NA	NA	NA	NULL	up
4.67_762.8284m/z	1.63413	0.026303	0.075256	0.77902	2.44282	CaseC:Control	NA	NULL	NA	NA	NA	NA	NA	NA	NA	NA	NA	NA	NA	NULL	up
4.67_789.2987m/z	2.03569	0.00517255	0.0146896	0.520335	2.90205	CaseC:Control	NA	NULL	NA	NA	NA	NA	NA	NA	NA	NA	NA	NA	NA	NULL	up
4.67_808.8708n	1.75661	0.00891261	0.0288056	0.653022	2.67385	CaseC:Control	NA	NULL	NA	NA	NA	NA	NA	NA	NA	NA	NA	NA	NA	NULL	up
4.67_811.8633m/z	1.82342	0.0298183	0.0185434	0.549514	2.82295	CaseC:Control	NA	NULL	NA	NA	NA	NA	NA	NA	NA	NA	NA	NA	NA	NULL	up
4.67_819.8625n	1.55485	0.0050086	0.0089307	0.482629	2.4424	CaseC:Control	NA	NULL	NA	NA	NA	NA	NA	NA	NA	NA	NA	NA	NA	NULL	up
4.67_821.3716m/z	1.56244	0.00498705	0.0114962	0.482629	2.45317	CaseC:Control	C15672	C15672	C49H58FeN4O5	M+H-H2O	20.5	0	-0.929834	3.52596	Heme O;	821.372	NA	4.668	1	map00860 Porphyrin and chlorophyll metabolism; map01110 Biosynthesis of secondary metabolites	up
4.67_829.3684n	1.59347	0.0133131	0.0232306	0.601873	2.30992	CaseC:Control	NA	NULL	NA	NA	NA	NA	NA	NA	NA	NA	NA	NA	NA	NULL	up
4.67_832.3608m/z	2.40995	0.000182	0.00013	0.117794	3.94551	CaseC:Control	C10579	C10579	C45H53NO14	M+H	31.5	0	8.30985	66.9567	Cephalomannine; Taxol B;	832.361	NA	4.668	1	NULL	up
4.67_832.3608m/z	2.40995	0.000182	0.00013	0.117794	3.94551	CaseC:Control	C17513	C17513	C38H54O19	M+NH4	35.1	5.69	1.27116	71.5704	trans-Crocetin (beta-D-glucosyl) (beta-D-gentibiosyl) ester; beta-D-Gentiobiosyl beta-D-glucosyl crocetin;	832.361	NA	4.668	1	NULL	up
4.67_875.3216n	1.72021	0.0251753	0.0232306	0.601873	2.3913	CaseC:Control	NA	NULL	NA	NA	NA	NA	NA	NA	NA	NA	NA	NA	NA	NULL	up
4.71_269.6084m/z	1.5541	0.0220059	0.0146896	0.520335	2.62395	CaseC:Control	NA	NULL	NA	NA	NA	NA	NA	NA	NA	NA	NA	NA	NA	NULL	up
4.71_529.2867n	1.41995	0.0193219	0.0232306	0.601873	2.31792	CaseC:Control	NA	NULL	NA	NA	NA	NA	NA	NA	NA	NA	NA	NA	NA	NULL	up
4.73_248.5844m/z	1.65	0.0267772	0.0432571	0.702966	3.36576	CaseC:Control	NA	NULL	NA	NA	NA	NA	NA	NA	NA	NA	NA	NA	NA	NULL	up
4.73_284.6249m/z	1.5525	0.017131	0.0185434	0.549514	2.65099	CaseC:Control	NA	NULL	NA	NA	NA	NA	NA	NA	NA	NA	NA	NA	NA	NULL	up
4.73_399.1994m/z	1.41789	0.044163	0.0524259	0.726908	2.04998	CaseC:Control	C07310	C07310	C24H32O4S	M+H-H2O	37.8	0	1.27737	90.4362	Spironolactone;	399.199	NA	4.72515	1	NULL	up
4.73_399.1994m/z	1.41789	0.044163	0.0524259	0.726908	2.04998	CaseC:Control	C17659	C17659	C20H30O8	M+H	38.2	2.2	-4.94847	94.428	Cinncassiol E;	399.199	NA	4.72515	1	NULL	up
4.73_399.1994m/z	1.41789	0.044163	0.0524259	0.726908	2.04998	CaseC:Control	C19515	C19515	C20H30O8	M+H	39.1	6.73	-4.94847	94.428	Ptaquiloside; Braxin C;	399.199	NA	4.72515	1	NULL	up
4.73_399.1994m/z	1.41789	0.044163	0.0524259	0.726908	2.04998	CaseC:Control	C16443	C16443	C16H23N5O6	M+NH4	38.2	0	1.87554	93.185	trans-Zeatin-7-beta-D-glucoside;	399.199	NA	4.72515	1	map00908 Zeatin biosynthesis; map01110 Biosynthesis of secondary metabolites	up
4.73_399.1994m/z	1.41789	0.044163	0.0524259	0.726908	2.04998	CaseC:Control	C03423	C03423	C16H23N5O6	M+NH4	41.4	15.9	1.87554	93.185	O-beta-D-Glucosylzeatin; O-beta-D-Glucosyl-trans-zeatin; trans-Zeatin-O-glucoside;	399.199	NA	4.72515	1	map00908 Zeatin biosynthesis; map01110 Biosynthesis of secondary metabolites	up
4.73_399.1994m/z	1.41789	0.044163	0.0524259	0.726908	2.04998	CaseC:Control	C15546	C15546	C16H23N5O6	M+NH4	41.4	15.9	1.87554	93.185	O-beta-D-Glucopyranosyl-cis-zeatin; cis-Zeatin-O-glucoside;	399.199	NA	4.72515	1	map00908 Zeatin biosynthesis	up
4.73_399.1994m/z	1.41789	0.044163	0.0524259	0.726908	2.04998	CaseC:Control	C14973	C14973	C22H32O3S	M+Na	36.8	0	7.80776	92.6223	17beta-Hydroxy-7alpha-mercaptoandrost-4-en-3-one 7-propionate; S-(17beta-Hydroxy-3-oxoandrost-4-en-7alpha-yl)propanethioate;	399.199	NA	4.72515	1	NULL	up
4.73_417.1682m/z	1.65291	0.0459091	0.0524259	0.726908	2.23554	CaseC:Control	C09158	C09158	C26H24O5	M+H	44.1	36.4	-3.49277	88.4604	Calophyllolide;	417.168	NA	4.72515	1	NULL	up
4.73_417.1682m/z	1.65291	0.0459091	0.0524259	0.726908	2.23554	CaseC:Control	C09593	C09593	C21H21NO7	M+NH4	35.7	0	6.43696	85.6148	Narcotoline;	417.168	NA	4.72515	1	NULL	up
4.73_417.1682m/z	1.65291	0.0459091	0.0524259	0.726908	2.23554	CaseC:Control	C11803	C11803	C19H21N5O3S	M+NH4	39	18.3	-5.35994	82.8919	Oxmetidine;	417.168	NA	4.72515	1	NULL	up
4.73_417.1682m/z	1.65291	0.0459091	0.0524259	0.726908	2.23554	CaseC:Control	C17012	C17012	C21H30O6	M+K	36.6	0	2.11521	85.6057	Nigakilactone A; Quassin;	417.168	NA	4.72515	1	NULL	up
4.73_417.1682m/z	1.65291	0.0459091	0.0524259	0.726908	2.23554	CaseC:Control	C15291	C15291	C21H30O6	M+K	36.6	0	2.11521	85.6057	6alpha-Hydroxycortisol; 6alpha,11beta,17,21-Tetrahydroxypregn-4-ene-3,20-dione;	417.168	NA	4.72515	1	NULL	up
4.73_690.3445m/z	2.18445	0.0106517	0.035463	0.675585	3.26491	CaseC:Control	C08704	C08704	C36H51NO12	M+H	40.1	20.9	-5.61396	86.0265	Pseudoaconitine;	690.345	NA	4.72515	1	NULL	up
4.74_1035.4618m/z	1.91486	0.0103134	0.0089307	0.482629	2.85634	CaseC:Control	NA	NULL	NA	NA	NA	NA	NA	NA	NA	NA	NA	NA	NA	NULL	up
4.74_503.5278n	1.92783	0.00101977	0.000487	0.184054	3.12135	CaseC:Control	NA	NULL	NA	NA	NA	NA	NA	NA	NA	NA	NA	NA	NA	NULL	up
4.74_503.8591n	1.88822	0.000372	0.00013	0.117794	3.08401	CaseC:Control	NA	NULL	NA	NA	NA	NA	NA	NA	NA	NA	NA	NA	NA	NULL	up
4.74_521.2278m/z	1.6978	0.0223163	0.0114962	0.482629	2.83952	CaseC:Control	C07813	C07813	C28H37ClO7	M+H	31.9	0	-4.37001	64.7395	Beclomethasone dipropionate; Beclometasone dipropionate;	521.228	NA	4.73943	1	NULL	up
4.74_521.2278m/z	1.6978	0.0223163	0.0114962	0.482629	2.83952	CaseC:Control	C07704	C07704	C27H34N2O7	M+Na	36.2	0	3.93821	85.7457	Moexipril;	521.228	NA	4.73943	1	NULL	up
4.74_532.2071m/z	1.54542	0.00312766	0.00105003	0.238043	2.49399	CaseC:Control	C08440	C08440	C15H34N9O8PS	M+H	37	0	1.73516	87.1576	Phaseolotoxin; N5-[Amino(sulfoamino)phosphinyl]-L-ornithyl-L-alanyl-N6-(aminoiminomethyl)-L-lysine;	532.207	NA	4.73943	1	NULL	up
4.74_548.5418n	1.55479	0.00972561	0.00519604	0.420694	2.30498	CaseC:Control	NA	NULL	NA	NA	NA	NA	NA	NA	NA	NA	NA	NA	NA	NULL	up
4.74_548.8763n	1.59063	0.00465882	0.00150469	0.262394	2.53135	CaseC:Control	NA	NULL	NA	NA	NA	NA	NA	NA	NA	NA	NA	NA	NA	NULL	up
4.74_549.1759m/z	1.95742	0.00260103	0.00208924	0.305568	3.04457	CaseC:Control	C21215	C21215	C22H31N4O9P	M+Na	35.1	14.2	7.25605	69.258	Prenylated FMNH2; Reduced prFMN;	549.176	NA	4.73943	1	NULL	up
4.74_549.1759m/z	1.95742	0.00260103	0.00208924	0.305568	3.04457	CaseC:Control	C15623	C15623	C31H30N2O5	M+K	35.7	9.77	-5.34332	74.947	GW 409544; GW 9544;	549.176	NA	4.73943	1	NULL	up
4.74_758.3467n	1.79193	0.00746333	0.0114962	0.482629	2.96932	CaseC:Control	NA	NULL	NA	NA	NA	NA	NA	NA	NA	NA	NA	NA	NA	NULL	up
4.74_760.3306n	1.53484	0.036707	0.0432571	0.702966	2.28985	CaseC:Control	NA	NULL	NA	NA	NA	NA	NA	NA	NA	NA	NA	NA	NA	NULL	up
4.74_770.3460m/z	1.50658	0.00744182	0.00388621	0.374895	2.35232	CaseC:Control	NA	NULL	NA	NA	NA	NA	NA	NA	NA	NA	NA	NA	NA	NULL	up
4.74_770.8477m/z	1.50042	0.00678411	0.00388621	0.374895	2.35271	CaseC:Control	NA	NULL	NA	NA	NA	NA	NA	NA	NA	NA	NA	NA	NA	NULL	up
4.75_513.2677m/z	1.49034	0.00897265	0.0146896	0.520335	2.52778	CaseC:Control	NA	NULL	NA	NA	NA	NA	NA	NA	NA	NA	NA	NA	NA	NULL	up
4.82_648.3108m/z	1.94655	0.00734693	0.00388621	0.374895	3.68433	CaseC:Control	NA	NULL	NA	NA	NA	NA	NA	NA	NA	NA	NA	NA	NA	NULL	up
4.86_380.9658m/z	2.13291	0.0196194	0.0146896	0.520335	3.34939	CaseC:Control	NA	NULL	NA	NA	NA	NA	NA	NA	NA	NA	NA	NA	NA	NULL	up
4.86_386.0611n	2.20175	0.00781793	0.00208924	0.305568	2.89495	CaseC:Control	C18889	C18889	C12H14N6O7S	M+H, M+Na	36.4	0	-8.62243	91.4505	Pyrazosulfuron;	387.068	386.061	4.86017	1	NULL	up
4.95_531.2779m/z	1.5188	0.031892	0.0524259	0.726908	1.97928	CaseC:Control	C15710	C15710	C25H40NO8P	M+NH4	37.1	0	-9.81036	96.2338	Phoslactomycin B;	531.278	NA	4.94588	1	NULL	up
5.24_810.3741m/z	1.68492	0.0445204	0.0524259	0.726908	2.56051	CaseC:Control	NA	NULL	NA	NA	NA	NA	NA	NA	NA	NA	NA	NA	NA	NULL	up
5.42_279.0050m/z	0.72436	0.0277755	0.0432571	0.702966	1.35905	CaseC:Control	C11453	C11453	C5H12O9P2	M+H	32.9	0	7.55096	73.0796	2-C-Methyl-D-erythritol 2,4-cyclodiphosphate; 3-Methyl-1,2,3,4-tetrahydroxybutane-1,3-cyclic bisphosphate;	279.005	NA	5.42378	1	map00900 Terpenoid backbone biosynthesis; map01100 Metabolic pathways; map01110 Biosynthesis of secondary metabolites; map01130 Biosynthesis of antibiotics	down
5.42_279.0050m/z	0.72436	0.0277755	0.0432571	0.702966	1.35905	CaseC:Control	C14267	C14267	C14H8O4	M+K	36	2.42	-1.60816	79.6372	Anthrafravic acid; Anthraflavin; 2,6-Dihydroxyanthraquinone;	279.005	NA	5.42378	1	NULL	down
5.42_279.0050m/z	0.72436	0.0277755	0.0432571	0.702966	1.35905	CaseC:Control	C10312	C10312	C14H8O4	M+K	36	2.42	-1.60816	79.6372	Danthron; Chrysazin; 1,8-Dihydroxyanthraquinone;	279.005	NA	5.42378	1	NULL	down
5.42_279.0050m/z	0.72436	0.0277755	0.0432571	0.702966	1.35905	CaseC:Control	C01474	C01474	C14H8O4	M+K	36.2	3.12	-1.60816	79.6372	Alizarin; Dihydroxyanthraquinone; 1,2-Dihydroxyanthraquinone; Dihydroxy-9,10-anthracenedione;	279.005	NA	5.42378	1	NULL	down
5.44_255.0650m/z	0.599109	0.0253017	0.0288056	0.653022	2.59558	CaseC:Control	C06561	C06561	C15H12O5	M+H-H2O	37.6	0	-0.626596	89.0111	Naringenin chalcone; 2',4,4',6'-Tetrahydroxychalcone; Isosalipurpol; Chalconaringenin;	255.065	NA	5.43807	1	map00941 Flavonoid biosynthesis; map01061 Biosynthesis of phenylpropanoids; map01100 Metabolic pathways; map01110 Biosynthesis of secondary metabolites	down
5.44_255.0650m/z	0.599109	0.0253017	0.0288056	0.653022	2.59558	CaseC:Control	C09047	C09047	C15H12O5	M+H-H2O	37.6	0	-0.626596	89.0111	Rubrofusarin;	255.065	NA	5.43807	1	NULL	down
5.44_255.0650m/z	0.599109	0.0253017	0.0288056	0.653022	2.59558	CaseC:Control	C01263	C01263	C15H12O5	M+H-H2O	37.6	0	-0.626596	89.0111	3,6,9-Trihydroxypterocarpan; (6aS,11aS)-3,6a,9-Trihydroxypterocarpan; (-)-Glycinol;	255.065	NA	5.43807	1	map00943 Isoflavonoid biosynthesis	down
5.44_255.0650m/z	0.599109	0.0253017	0.0288056	0.653022	2.59558	CaseC:Control	C08578	C08578	C15H12O5	M+H-H2O	37.6	0	-0.626596	89.0111	Butein;	255.065	NA	5.43807	1	map00941 Flavonoid biosynthesis	down
5.44_255.0650m/z	0.599109	0.0253017	0.0288056	0.653022	2.59558	CaseC:Control	C09826	C09826	C15H12O5	M+H-H2O	37.6	0	-0.626596	89.0111	Pinobanksin; 3,5,7-Trihydroxyflavanone;	255.065	NA	5.43807	1	map00941 Flavonoid biosynthesis	down
5.44_255.0650m/z	0.599109	0.0253017	0.0288056	0.653022	2.59558	CaseC:Control	C09751	C09751	C15H12O5	M+H-H2O	37.6	0	-0.626596	89.0111	Garbanzol; 3,7,4'-Trihydroxyflavanone;	255.065	NA	5.43807	1	map00941 Flavonoid biosynthesis	down
5.44_255.0650m/z	0.599109	0.0253017	0.0288056	0.653022	2.59558	CaseC:Control	C00509	C00509	C15H12O5	M+H-H2O	37.6	0	-0.626596	89.0111	Naringenin; 4',5,7-Trihydroxyflavanone; (2S)-Naringenin; (-)-(2S)-Naringenin;	255.065	NA	5.43807	1	map00941 Flavonoid biosynthesis; map00943 Isoflavonoid biosynthesis; map01061 Biosynthesis of phenylpropanoids; map01100 Metabolic pathways; map01110 Biosynthesis of secondary metabolites	down
5.44_255.0650m/z	0.599109	0.0253017	0.0288056	0.653022	2.59558	CaseC:Control	C12087	C12087	C15H12O5	M+H-H2O	37.6	0	-0.626596	89.0111	p-Coumaroyltriacetic acid lactone;	255.065	NA	5.43807	1	NULL	down
5.44_255.0650m/z	0.599109	0.0253017	0.0288056	0.653022	2.59558	CaseC:Control	C16232	C16232	C15H12O5	M+H-H2O	37.6	0	-0.626596	89.0111	6,7,4'-Trihydroxyflavanone;	255.065	NA	5.43807	1	map00943 Isoflavonoid biosynthesis; map01110 Biosynthesis of secondary metabolites	down
5.44_255.0650m/z	0.599109	0.0253017	0.0288056	0.653022	2.59558	CaseC:Control	C15567	C15567	C15H12O5	M+H-H2O	37.6	0	-0.626596	89.0111	2,7,4'-Trihydroxyisoflavanone;	255.065	NA	5.43807	1	map00943 Isoflavonoid biosynthesis; map01110 Biosynthesis of secondary metabolites	down
5.44_255.0650m/z	0.599109	0.0253017	0.0288056	0.653022	2.59558	CaseC:Control	C09614	C09614	C15H12O5	M+H-H2O	37.6	0	-0.626596	89.0111	Butin; (-)-Butin; 7,3',4'-Trihydroxyflavanone;	255.065	NA	5.43807	1	map00941 Flavonoid biosynthesis	down
5.44_255.0650m/z	0.599109	0.0253017	0.0288056	0.653022	2.59558	CaseC:Control	C17673	C17673	C15H12O5	M+H-H2O	37.6	0	-0.626596	89.0111	Toralactone;	255.065	NA	5.43807	1	NULL	down
5.44_255.0650m/z	0.599109	0.0253017	0.0288056	0.653022	2.59558	CaseC:Control	C14458	C14458	C15H12O5	M+H-H2O	37.6	0	-0.626596	89.0111	Dihydrogenistein; 4',5,7-Trihydroxyisoflavan-4-one;	255.065	NA	5.43807	1	NULL	down
5.44_255.0650m/z	0.599109	0.0253017	0.0288056	0.653022	2.59558	CaseC:Control	C01592	C01592	C15H12O5	M+H-H2O	37.6	0	-0.626596	89.0111	Licodione;	255.065	NA	5.43807	1	NULL	down
5.44_255.0650m/z	0.599109	0.0253017	0.0288056	0.653022	2.59558	CaseC:Control	C03567	C03567	C15H12O5	M+H-H2O	37.6	0	-0.626596	89.0111	2'-Hydroxydihydrodaidzein; 2'-Hydroxy-2,3-dihydrodaidzein;	255.065	NA	5.43807	1	map00943 Isoflavonoid biosynthesis	down
5.44_255.0650m/z	0.599109	0.0253017	0.0288056	0.653022	2.59558	CaseC:Control	C05844	C05844	C7H14N2O6S	M+H	36.8	0	1.89386	86.3519	5-L-Glutamyl-taurine; 5-Glutamyl-taurine; Glutaurine;	255.065	NA	5.43807	1	map00430 Taurine and hypotaurine metabolism	down
5.44_255.0650m/z	0.599109	0.0253017	0.0288056	0.653022	2.59558	CaseC:Control	C10200	C10200	C15H10O4	M+H	37.6	0	-0.67101	88.8273	Anhydroglycinol; 3,9-Dihydroxypterocarpen;	255.065	NA	5.43807	1	map00943 Isoflavonoid biosynthesis; map01110 Biosynthesis of secondary metabolites	down
5.44_255.0650m/z	0.599109	0.0253017	0.0288056	0.653022	2.59558	CaseC:Control	C10028	C10028	C15H10O4	M+H	37.6	0	-0.67101	88.8273	Chrysin; 5,7-Dihydroxyflavone;	255.065	NA	5.43807	1	map00941 Flavonoid biosynthesis	down
5.44_255.0650m/z	0.599109	0.0253017	0.0288056	0.653022	2.59558	CaseC:Control	C10402	C10402	C15H10O4	M+H	37.6	0	-0.67101	88.8273	Rubiadin;	255.065	NA	5.43807	1	NULL	down
5.44_255.0650m/z	0.599109	0.0253017	0.0288056	0.653022	2.59558	CaseC:Control	C12123	C12123	C15H10O4	M+H	37.6	0	-0.67101	88.8273	7,4'-Dihydroxyflavone;	255.065	NA	5.43807	1	map00941 Flavonoid biosynthesis; map00943 Isoflavonoid biosynthesis	down
5.44_255.0650m/z	0.599109	0.0253017	0.0288056	0.653022	2.59558	CaseC:Control	C10329	C10329	C15H10O4	M+H	37.6	0	-0.67101	88.8273	1,4-Dihydroxy-2-methylanthraquinone;	255.065	NA	5.43807	1	NULL	down
5.44_255.0650m/z	0.599109	0.0253017	0.0288056	0.653022	2.59558	CaseC:Control	C10121	C10121	C15H10O4	M+H	37.6	0	-0.67101	88.8273	Primetin; 5,8-Dihydroxyflavone;	255.065	NA	5.43807	1	NULL	down
5.44_255.0650m/z	0.599109	0.0253017	0.0288056	0.653022	2.59558	CaseC:Control	C08644	C08644	C15H10O4	M+H	37.6	0	-0.67101	88.8273	Hispidol;	255.065	NA	5.43807	1	NULL	down
5.44_255.0650m/z	0.599109	0.0253017	0.0288056	0.653022	2.59558	CaseC:Control	C10315	C10315	C15H10O4	M+H	37.6	0	-0.67101	88.8273	Chrysophanol; Chrysophanic acid; 1,8-Dihydroxy-3-methylanthraquinone;	255.065	NA	5.43807	1	NULL	down
5.44_255.0650m/z	0.599109	0.0253017	0.0288056	0.653022	2.59558	CaseC:Control	C14344	C14344	C15H10O4	M+H	37.6	0	-0.67101	88.8273	4',6-Dihydroxyflavone;	255.065	NA	5.43807	1	NULL	down
5.44_255.0650m/z	0.599109	0.0253017	0.0288056	0.653022	2.59558	CaseC:Control	C10208	C10208	C15H10O4	M+H	37.6	0	-0.67101	88.8273	Daidzein;	255.065	NA	5.43807	1	map00943 Isoflavonoid biosynthesis; map01061 Biosynthesis of phenylpropanoids; map01110 Biosynthesis of secondary metabolites	down
5.44_255.0650m/z	0.599109	0.0253017	0.0288056	0.653022	2.59558	CaseC:Control	C10291	C10291	C15H10O4	M+H	37.6	0	-0.67101	88.8273	Alizarin 2-methyl ether; 1-Hydroxy-2-methoxyanthraquinone;	255.065	NA	5.43807	1	NULL	down
5.44_255.0650m/z	0.599109	0.0253017	0.0288056	0.653022	2.59558	CaseC:Control	C10327	C10327	C15H10O4	M+H	37.6	0	-0.67101	88.8273	Digiferrugineol; 1-Hydroxy-2-hydroxymethylanthraquinone;	255.065	NA	5.43807	1	NULL	down
5.44_255.0650m/z	0.599109	0.0253017	0.0288056	0.653022	2.59558	CaseC:Control	C18929	C18929	C10H8ClN3O2	M+NH4	35	0	2.88999	78.5652	Drazoxolon;	255.065	NA	5.43807	1	NULL	down
5.44_255.0650m/z	0.599109	0.0253017	0.0288056	0.653022	2.59558	CaseC:Control	C09930	C09930	C13H12O4	M+Na	35.3	0	9.63148	87.0116	Goniothalenol; Altholactone;	255.065	NA	5.43807	1	NULL	down
5.44_255.0650m/z	0.599109	0.0253017	0.0288056	0.653022	2.59558	CaseC:Control	C20841	C20841	C13H12O4	M+Na	35.3	0	9.63148	87.0116	2-Hydroxy-7-methoxy-5-methyl-1-naphthoate;	255.065	NA	5.43807	1	NULL	down
5.50_125.0972m/z	1.21416	0.0453911	0.035463	0.675585	1.31316	CaseC:Control	C16653	C16653	C8H14O2	M+H-H2O	37.9	0	7.5466	97.8782	2-n-Propyl-2-pentenoic acid; 2-En-valproic acid; 2-Ene-VPA;	125.097	NA	5.50165	1	map00982 Drug metabolism - cytochrome P450	up
5.50_125.0972m/z	1.21416	0.0453911	0.035463	0.675585	1.31316	CaseC:Control	C16654	C16654	C8H14O2	M+H-H2O	37.9	0	7.5466	97.8782	2-n-Propyl-3-pentenoic acid; 3-En-valproic acid; 3-Ene-VPA;	125.097	NA	5.50165	1	map00982 Drug metabolism - cytochrome P450	up
5.50_125.0972m/z	1.21416	0.0453911	0.035463	0.675585	1.31316	CaseC:Control	C16648	C16648	C8H14O2	M+H-H2O	37.9	0	7.5466	97.8782	2-n-Propyl-4-pentenoic acid; 4-En-valproic acid; 4-Ene-VPA;	125.097	NA	5.50165	1	map00982 Drug metabolism - cytochrome P450	up
5.50_125.0972m/z	1.21416	0.0453911	0.035463	0.675585	1.31316	CaseC:Control	C12297	C12297	C8H14O2	M+H-H2O	37.9	0	7.5466	97.8782	Cyclohexyl acetate;	125.097	NA	5.50165	1	NULL	up
5.50_125.0972m/z	1.21416	0.0453911	0.035463	0.675585	1.31316	CaseC:Control	C19318	C19318	C8H14O2	M+H-H2O	37.9	0	7.5466	97.8782	Allyl isovalerate;	125.097	NA	5.50165	1	NULL	up
5.50_125.0972m/z	1.21416	0.0453911	0.035463	0.675585	1.31316	CaseC:Control	C19757	C19757	C8H14O2	M+H-H2O	37.9	0	7.5466	97.8782	(Z)-3-Hexen-1-ol acetate; (3Z)-Hex-3-en-1-yl acetate; cis-3-Hexenyl acetate;	125.097	NA	5.50165	1	map00592 alpha-Linolenic acid metabolism; map01110 Biosynthesis of secondary metabolites	up
5.50_125.0972m/z	1.21416	0.0453911	0.035463	0.675585	1.31316	CaseC:Control	C12104	C12104	C8H14O2	M+H-H2O	37.9	0	7.5466	97.8782	Cycloheptanecarboxylic acid; Cycloheptanoic acid;	125.097	NA	5.50165	1	NULL	up
5.59_288.2175m/z	2.00084	0.00851336	0.00684146	0.462973	3.87684	CaseC:Control	C02838	C02838	C15H29NO4	M+H	37.3	0	1.85985	88.8924	L-Octanoylcarnitine;	288.217	NA	5.58737	1	NULL	up
5.59_288.2175m/z	2.00084	0.00851336	0.00684146	0.462973	3.87684	CaseC:Control	C16506	C16506	C15H26O4	M+NH4	37.4	0	1.97706	89.2473	(10S)-Juvenile hormone III acid diol;	288.217	NA	5.58737	1	map00981 Insect hormone biosynthesis	up
5.64_521.0199m/z	0.282655	0.00641283	0.0089307	0.482629	4.96145	CaseC:Control	NA	NULL	NA	NA	NA	NA	NA	NA	NA	NA	NA	NA	NA	NULL	down
5.77_430.7860m/z	0.611002	0.0200721	0.0232306	0.601873	2.75653	CaseC:Control	C15213	C15213	C12H3Cl7O	M+Na	20.5	0	-8.67841	12.1864	2,2',3',4,4',5,5'-Heptachloro-3-biphenylol;	430.786	NA	5.7731	1	NULL	down
5.77_430.7860m/z	0.611002	0.0200721	0.0232306	0.601873	2.75653	CaseC:Control	C14382	C14382	C12H3Cl7O	M+Na	20.5	0	-8.67841	12.1864	4-Hydroxy-2,2',3,4',5,5',6-heptachlorobiphenyl; 2,2',3,4',5,5',6-Heptachloro-4-biphenylol; 4-Hydroxy-PCB 187;	430.786	NA	5.7731	1	NULL	down
5.77_430.7860m/z	0.611002	0.0200721	0.0232306	0.601873	2.75653	CaseC:Control	C14726	C14726	C12H3Cl7O	M+Na	20.5	0	-8.67841	12.1864	2,2',3,3',4',5,5'-Heptachloro-4-biphenylol;	430.786	NA	5.7731	1	NULL	down
5.79_186.1157n	0.819834	0.00268312	0.00208924	0.305568	1.66686	CaseC:Control	C09089	C09089	C12H14N2	M+H, M+Na	34.6	0	0.0145957	72.8577	Calligonine; Elaeagnine; Tetrahydroharman;	187.123	186.116	5.78738	1	map01063 Biosynthesis of alkaloids derived from shikimate pathway	down
5.79_186.1157n	0.819834	0.00268312	0.00208924	0.305568	1.66686	CaseC:Control	C14701	C14701	C12H14N2+2	M+H, M+Na	34.6	0	0.0145957	72.8577	Paraquat; 1,1'-Dimethyl-4,4'-bipyridinium;	187.123	186.116	5.78738	1	NULL	down
5.83_513.2761m/z	1.4853	0.00213872	0.00287947	0.343567	1.94433	CaseC:Control	C11301	C11301	C26H42NO7S-	M+H	38.8	0	1.24179	95.6967	Sulfoglycolithocholate; Glycolithocholate 3-sulfate; Sulfolithocholylglycine;	513.276	NA	5.83382	1	NULL	up
6.02_347.2255m/z	1.72204	0.00475735	0.00519604	0.420694	2.82047	CaseC:Control	C10573	C10573	C22H26N4	M+H	36.8	0	7.03265	91.9518	Calycanthine;	347.225	NA	6.0224	1	NULL	up
6.02_347.2255m/z	1.72204	0.00475735	0.00519604	0.420694	2.82047	CaseC:Control	C09133	C09133	C22H26N4	M+H	36.8	0	7.03265	91.9518	(-)-Chimonanthine;	347.225	NA	6.0224	1	NULL	up
6.15_320.1849m/z	0.81117	0.0246743	0.0288056	0.653022	1.24021	CaseC:Control	C17982	C17982	C13H27N3O7	M+H-H2O	27.6	0	9.76884	48.507	Istamycin AO;	320.185	NA	6.15098	1	map01130 Biosynthesis of antibiotics	down
6.15_320.1849m/z	0.81117	0.0246743	0.0288056	0.653022	1.24021	CaseC:Control	C10353	C10353	C18H27NO5	M+H-H2O	29.6	0	-2.16154	50.6651	Nemorensine; C(16a)-Homo-21-norsenecionan-11,16a-dione, 12,15-epoxy-1,2,15,20-tetrahydro-, (1alpha,12R,15R)-;	320.185	NA	6.15098	1	NULL	down
6.15_320.1849m/z	0.81117	0.0246743	0.0288056	0.653022	1.24021	CaseC:Control	C10363	C10363	C18H27NO5	M+H-H2O	29.6	0	-2.16154	50.6651	Platyphylline;	320.185	NA	6.15098	1	NULL	down
6.15_320.1849m/z	0.81117	0.0246743	0.0288056	0.653022	1.24021	CaseC:Control	C10383	C10383	C18H27NO5	M+H-H2O	48.3	93.6	-2.16154	50.6651	Sarracine; 7-Angelyl-9-sarracinylplatynecine;	320.185	NA	6.15098	1	NULL	down
6.15_320.1849m/z	0.81117	0.0246743	0.0288056	0.653022	1.24021	CaseC:Control	C16790	C16790	C18H25NO4	M+H	29.6	0	-2.2835	50.7002	Coronatine;	320.185	NA	6.15098	1	NULL	down
6.15_320.1849m/z	0.81117	0.0246743	0.0288056	0.653022	1.24021	CaseC:Control	C20201	C20201	C18H22O4	M+NH4	29.5	0	-2.41217	50.5258	(-)-Solanapyrone A; Solanapyrone A; 4-Methoxy-6-((1R,2S,4aR,8aR)-2-methyl-1,2,4a,5,6,7,8,8a-octahydronaphthalen-1-yl)-2-oxo-2H-pyran-3-carboxaldehyde;	320.185	NA	6.15098	1	NULL	down
6.15_320.1849m/z	0.81117	0.0246743	0.0288056	0.653022	1.24021	CaseC:Control	C19934	C19934	C18H22O4	M+NH4	49.2	98.2	-2.41217	50.5258	Prosolanapyrone III; 4-Methoxy-2-oxo-6-(1E,7E,9E)-undeca-1,7,9-trien-1-yl-2H-pyran-3-carboxaldehyde;	320.185	NA	6.15098	1	NULL	down
6.15_320.1849m/z	0.81117	0.0246743	0.0288056	0.653022	1.24021	CaseC:Control	C18166	C18166	C18H22O4	M+NH4	29.5	0	-2.41217	50.5258	Enterodiol;	320.185	NA	6.15098	1	NULL	down
6.15_320.1849m/z	0.81117	0.0246743	0.0288056	0.653022	1.24021	CaseC:Control	C14243	C14243	C18H22O4	M+NH4	29.5	0	-2.41217	50.5258	3,3'-Dihydroxyhexestrol; 4,4'-(1,2-Diethylethylene)dipyrocatechol;	320.185	NA	6.15098	1	NULL	down
6.15_320.1849m/z	0.81117	0.0246743	0.0288056	0.653022	1.24021	CaseC:Control	C10719	C10719	C18H22O4	M+NH4	29.5	0	-2.41217	50.5258	Nordihydroguaiaretic acid; NDGA;	320.185	NA	6.15098	1	NULL	down
6.15_320.1849m/z	0.81117	0.0246743	0.0288056	0.653022	1.24021	CaseC:Control	C10302	C10302	C18H22O4	M+NH4	47.7	91.1	-2.41217	50.5258	Arnebinone;	320.185	NA	6.15098	1	NULL	down
6.15_320.1849m/z	0.81117	0.0246743	0.0288056	0.653022	1.24021	CaseC:Control	C11840	C11840	C16H27NO4	M+Na	47.3	93.1	5.64225	49.757	N-(3-Oxododecanoyl)homoserine lactone;	320.185	NA	6.15098	1	NULL	down
6.15_320.1849m/z	0.81117	0.0246743	0.0288056	0.653022	1.24021	CaseC:Control	C21201	C21201	C16H27NO4	M+Na	47.3	93.1	5.64225	49.757	NA	320.185	NA	6.15098	1	NULL	down
6.37_316.2487m/z	1.71284	0.0471572	0.0892096	0.815476	3.4127	CaseC:Control	C03299	C03299	C17H33NO4	M+H	38.3	0	1.56892	93.5685	O-Decanoyl-L-carnitine;	316.249	NA	6.37172	1	NULL	up
6.37_316.2487m/z	1.71284	0.0471572	0.0892096	0.815476	3.4127	CaseC:Control	C17158	C17158	C17H30O4	M+NH4	38.4	0	1.6585	93.9419	Plakortic acid;	316.249	NA	6.37172	1	NULL	up
6.66_404.0778m/z	16.9181	0.00390919	0.00684146	0.462973	5.98171	CaseC:Control	C06628	C06628	C20H15NO7	M+Na	33.4	0	9.7384	77.4489	4-Hydroxy-6-methylpretetramide;	404.078	NA	6.6639	1	map00253 Tetracycline biosynthesis; map01057 Biosynthesis of type II polyketide products; map01130 Biosynthesis of antibiotics	up
6.76_273.2673n	1.4118	0.0403081	0.0524259	0.726908	1.01805	CaseC:Control	C13915	C13915	C16H35NO2	M+H-H2O, M+H, M+Na	39.4	0	1.76127	99.1888	Hexadecasphinganine;	274.275	273.267	6.7639	1	NULL	up
6.79_317.2939n	1.66551	0.0054675	0.0146896	0.520335	2.90146	CaseC:Control	C12144	C12144	C18H39NO3	M+H-H2O, M+H	38.9	0	2.84669	97.9271	Phytosphingosine; 4-D-Hydroxysphinganine;	318.301	317.294	6.79248	1	map00600 Sphingolipid metabolism; map01100 Metabolic pathways	up
6.79_362.3268m/z	1.78597	0.00550587	0.0185434	0.549514	3.02831	CaseC:Control	C11317	C11317	C18H36O3.[C2H4O]n	M+NH4	39.4	98	0.910937	NA	Solutol HS 15;	362.327	NA	6.79248	1	NULL	up
6.81_406.3530m/z	2.64764	0.00917671	0.00388621	0.374895	2.8266	CaseC:Control	C19805	C19805	C22H47NO5	M+H	37.7	0	0.618639	89.3945	Aminopentol; AP1;	406.353	NA	6.80677	1	NULL	up
6.90_968.7086m/z	0.673796	0.037442	0.0232306	0.601873	1.96345	CaseC:Control	NA	NULL	NA	NA	NA	NA	NA	NA	NA	NA	NA	NA	NA	NULL	down
6.98_456.3327m/z	1.41959	0.0435198	0.0630128	0.747906	1.7053	CaseC:Control	NA	NULL	NA	NA	NA	NA	NA	NA	NA	NA	NA	NA	NA	NULL	up
7.00_344.2800m/z	1.46105	0.0486624	0.0630128	0.747906	2.39601	CaseC:Control	NA	NULL	NA	NA	NA	NA	NA	NA	NA	NA	NA	NA	NA	NULL	up
7.06_464.2825m/z	1.81331	0.0241904	0.0146896	0.520335	4.16757	CaseC:Control	NA	NULL	NA	NA	NA	NA	NA	NA	NA	NA	NA	NA	NA	NULL	up
7.18_358.2948m/z	1.61242	0.0239139	0.0288056	0.653022	1.75743	CaseC:Control	NA	NULL	NA	NA	NA	NA	NA	NA	NA	NA	NA	NA	NA	NULL	up
7.23_370.2955m/z	1.54903	0.0254097	0.0432571	0.702966	2.79081	CaseC:Control	C09137	C09137	C21H36O4	M+NH4	48.3	45.7	0.817509	96.9487	Montanol;	370.295	NA	7.23395	1	NULL	up
7.23_394.2951m/z	1.47954	0.0319703	0.0288056	0.653022	2.06906	CaseC:Control	C15346	C15346	C23H36O4	M+NH4	38.5	0	-0.339378	92.6845	5alpha-Androstane-3beta,17beta-diol diacetate; 3beta,17beta-Diacetoxy-5alpha-androstane;	394.295	NA	7.23395	1	NULL	up
7.23_394.2951m/z	1.47954	0.0319703	0.0288056	0.653022	2.06906	CaseC:Control	C15157	C15157	C23H36O4	M+NH4	38.5	0	-0.339378	92.6845	3-Acetyl-5alpha-androstane-3beta,17beta-diol 3-acetate;	394.295	NA	7.23395	1	NULL	up
7.48_357.2784m/z	2.24865	0.019968	0.0185434	0.549514	3.35921	CaseC:Control	C03070	C03070	C24H38O3	M+H-H2O	38.3	0	-1.16013	92.6809	3-Oxo-5beta-cholanate; 3-Oxo-5beta-cholan-24-oate;	357.278	NA	7.47682	1	NULL	up
7.48_357.2784m/z	2.24865	0.019968	0.0185434	0.549514	3.35921	CaseC:Control	C15345	C15345	C24H38O3	M+H-H2O	38.3	0	-1.16013	92.6809	3beta-[(Tetrahydro-2H-pyran-2-yl)oxy]androst-5-en-17beta-ol; Androst-5-ene-3beta,17beta-diol 3-tetrahydropyranyl ether;	357.278	NA	7.47682	1	NULL	up
7.48_357.2784m/z	2.24865	0.019968	0.0185434	0.549514	3.35921	CaseC:Control	C14991	C14991	C24H38O3	M+H-H2O	38.3	0.125	-1.16013	92.6809	3beta,21-Dihydroxy-4,4,14-trimethyl-5alpha-pregn-8-en-20-one;	357.278	NA	7.47682	1	NULL	up
7.48_357.2784m/z	2.24865	0.019968	0.0185434	0.549514	3.35921	CaseC:Control	C16185	C16185	C24H36O2	M+H	38.3	0	-1.21877	92.9218	(4Z,7Z,10Z,13Z,16Z,19Z)-Docosahexaenoic acid ethyl ester; DHA ethyl ester;	357.278	NA	7.47682	1	NULL	up
7.48_357.2784m/z	2.24865	0.019968	0.0185434	0.549514	3.35921	CaseC:Control	C16534	C16534	C22H38O2	M+Na	37.7	0.244	5.89755	94.9158	13,16,19-Docosatrienoic acid; (13E,16E,19E)-Docosa-13,16,19-trienoic acid;	357.278	NA	7.47682	1	NULL	up
7.68_440.3279n	1.64823	0.017705	0.0089307	0.482629	2.16444	CaseC:Control	C08965	C08965	C29H44O3	M+H-H2O, M+H	35.4	0	-2.56059	80.1385	Pfaffic acid;	441.336	440.328	7.68493	1	NULL	up
7.70_481.3285m/z	1.48912	0.0400884	0.0524259	0.726908	1.37539	CaseC:Control	C09082	C09082	C32H40N4	M+H	35.5	0	-8.465	87.0082	Borreverine;	481.329	NA	7.69922	1	NULL	up
7.74_165.1283m/z	1.8019	0.00181906	0.00388621	0.374895	2.26748	CaseC:Control	C14113	C14113	C11H18O2	M+H-H2O	56.3	94.5	4.96271	92.87	Decahydro-2-naphthoic acid; Decahydro-2-naphthalenecarboxylic acid;	165.128	NA	7.7421	1	map00626 Naphthalene degradation; map01120 Microbial metabolism in diverse environments	up
7.74_165.1283m/z	1.8019	0.00181906	0.00388621	0.374895	2.26748	CaseC:Control	C12294	C12294	C11H18O2	M+H-H2O	55.3	89.2	4.96271	92.87	Geranyl formate;	165.128	NA	7.7421	1	NULL	up
7.74_165.1283m/z	1.8019	0.00181906	0.00388621	0.374895	2.26748	CaseC:Control	C14226	C14226	C11H16O	M+H	37.4	0	5.50733	93.0952	p-tert-Amylphenol; 4-t-Amylphenol; 4-tert-Pentylphenol;	165.128	NA	7.7421	1	NULL	up
7.74_165.1283m/z	1.8019	0.00181906	0.00388621	0.374895	2.26748	CaseC:Control	C14697	C14697	C11H16O	M+H	55	88.4	5.50733	93.0952	4-Isopentylphenol; p-Isoamylphenol;	165.128	NA	7.7421	1	NULL	up
7.74_165.1283m/z	1.8019	0.00181906	0.00388621	0.374895	2.26748	CaseC:Control	C08490	C08490	C11H16O	M+H	55.7	91.8	5.50733	93.0952	Jasmone; cis-Jasmone;	165.128	NA	7.7421	1	NULL	up
7.74_165.1283m/z	1.8019	0.00181906	0.00388621	0.374895	2.26748	CaseC:Control	C14466	C14466	C11H16O	M+H	55	88.4	5.50733	93.0952	4-n-Pentylphenol; p-Amylphenol;	165.128	NA	7.7421	1	NULL	up
7.74_224.1417n	1.69094	0.00131431	0.00105003	0.238043	2.29372	CaseC:Control	C04166	C04166	C13H20O3	M+H, M+Na	41.6	14.5	2.03652	95.755	(+/-)-6-Hydroxy-3-oxo-alpha-ionol; Vomifoliol;	225.149	224.142	7.7421	1	NULL	up
7.74_224.1417n	1.69094	0.00131431	0.00105003	0.238043	2.29372	CaseC:Control	C01760	C01760	C13H20O3	M+H, M+Na	41.6	14.5	2.03652	95.755	(6S,9R)-Vomifoliol; (6S,9R)-6-Hydroxy-3-oxo-alpha-ionol;	225.149	224.142	7.7421	1	NULL	up
7.74_224.1417n	1.69094	0.00131431	0.00105003	0.238043	2.29372	CaseC:Control	C16318	C16318	C13H20O3	M+H, M+Na	41.7	15.3	2.03652	95.755	(+)-7-Isomethyljasmonate;	225.149	224.142	7.7421	1	map00592 alpha-Linolenic acid metabolism; map01110 Biosynthesis of secondary metabolites	up
7.74_224.1417n	1.69094	0.00131431	0.00105003	0.238043	2.29372	CaseC:Control	C11512	C11512	C13H20O3	M+H, M+Na	41.7	15.3	2.03652	95.755	Methyl jasmonate; (-)-Methyl jasmonate;	225.149	224.142	7.7421	1	map00592 alpha-Linolenic acid metabolism; map01110 Biosynthesis of secondary metabolites	up
7.80_424.3426m/z	1.40443	0.0433796	0.0432571	0.702966	2.49769	CaseC:Control	C16893	C16893	C26H45N2O+	M+Na	39.5	0	0.392161	97.8073	Stellettamide A;	424.343	NA	7.79925	1	NULL	up
7.95_354.1295m/z	1.20199	0.031163	0.035463	0.675585	1.23014	CaseC:Control	C02138	C02138	C15H19N3O7	M+H	27.1	0	-0.120112	35.7924	Boc-Asn-OPhNO2;	354.13	NA	7.94855	1	NULL	up
7.95_354.1295m/z	1.20199	0.031163	0.035463	0.675585	1.23014	CaseC:Control	C18758	C18758	C14H28NO3PS2	M+H	26	0	-7.26328	38.3306	Piperophos;	354.13	NA	7.94855	1	NULL	up
7.95_354.1295m/z	1.20199	0.031163	0.035463	0.675585	1.23014	CaseC:Control	C12179	C12179	C18H21NO5	M+Na	26.2	0	-5.01138	36.6728	Tazettine; Sekisanin;	354.13	NA	7.94855	1	NULL	up
7.95_354.1295m/z	1.20199	0.031163	0.035463	0.675585	1.23014	CaseC:Control	C12237	C12237	C18H21NO5	M+Na	26.2	0.176	-5.01138	36.6728	2-O-Acetylpseudolycorine;	354.13	NA	7.94855	1	NULL	up
7.95_354.1295m/z	1.20199	0.031163	0.035463	0.675585	1.23014	CaseC:Control	C08536	C08536	C18H21NO5	M+Na	26.2	0	-5.01138	36.6728	Pretazettine;	354.13	NA	7.94855	1	NULL	up
7.95_354.1295m/z	1.20199	0.031163	0.035463	0.675585	1.23014	CaseC:Control	C08517	C08517	C18H21NO5	M+Na	26.2	0	-5.01138	36.6728	Ambelline; (3alpha,11S)-1,2-Didehydro-3,7-dimethoxycrinan-11-ol;	354.13	NA	7.94855	1	NULL	up
8.37_305.1331n	0.786329	0.0441328	0.0432571	0.702966	1.81588	CaseC:Control	NA	NULL	NA	NA	NA	NA	NA	NA	NA	NA	NA	NA	NA	NULL	down
8.51_125.0014m/z	0.733004	0.0236522	0.0630128	0.747906	2.25933	CaseC:Control	NA	NULL	NA	NA	NA	NA	NA	NA	NA	NA	NA	NA	NA	NULL	down
8.51_279.6481m/z	0.810228	0.0143513	0.0288056	0.653022	1.89319	CaseC:Control	NA	NULL	NA	NA	NA	NA	NA	NA	NA	NA	NA	NA	NA	NULL	down
8.51_288.6348m/z	0.79446	0.0106121	0.0185434	0.549514	2.01467	CaseC:Control	NA	NULL	NA	NA	NA	NA	NA	NA	NA	NA	NA	NA	NA	NULL	down
8.51_530.8227n	0.518465	0.0217939	0.035463	0.675585	2.98877	CaseC:Control	NA	NULL	NA	NA	NA	NA	NA	NA	NA	NA	NA	NA	NA	NULL	down
8.56_209.1905m/z	2.32439	0.00513205	0.0146896	0.520335	3.86423	CaseC:Control	C08322	C08322	C14H26O2	M+H-H2O	37.6	0	2.22222	90.7002	Myristoleic acid; (9Z)-Tetradecenoic acid; 9-Tetradecenoic acid; (Z)-Tetradec-9-enoic acid;	209.19	NA	8.55513	1	NULL	up
8.59_290.6120m/z	1.20043	0.027614	0.0146896	0.520335	1.58269	CaseC:Control	NA	NULL	NA	NA	NA	NA	NA	NA	NA	NA	NA	NA	NA	NULL	up
8.60_505.2331m/z	1.26157	0.0272285	0.0288056	0.653022	1.59983	CaseC:Control	C15674	C15674	C25H33N3O3S2	M+NH4	35.6	0.053	5.9767	84.8267	Myxothiazol A;	505.233	NA	8.60467	1	NULL	up
8.62_544.4797m/z	0.490111	0.0419314	0.0432571	0.702966	2.72977	CaseC:Control	NA	NULL	NA	NA	NA	NA	NA	NA	NA	NA	NA	NA	NA	NULL	down
8.62_570.7967m/z	0.675799	0.0447539	0.0524259	0.726908	2.25257	CaseC:Control	NA	NULL	NA	NA	NA	NA	NA	NA	NA	NA	NA	NA	NA	NULL	down
8.62_571.2980m/z	0.820241	0.016798	0.0288056	0.653022	1.56559	CaseC:Control	NA	NULL	NA	NA	NA	NA	NA	NA	NA	NA	NA	NA	NA	NULL	down
8.64_1038.6647n	0.646291	0.0159255	0.0432571	0.702966	2.68288	CaseC:Control	NA	NULL	NA	NA	NA	NA	NA	NA	NA	NA	NA	NA	NA	NULL	down
8.64_1058.6427m/z	0.682255	0.0449723	0.0630128	0.747906	2.24355	CaseC:Control	NA	NULL	NA	NA	NA	NA	NA	NA	NA	NA	NA	NA	NA	NULL	down
8.64_1060.6464n	0.816469	0.00978248	0.0114962	0.482629	1.88296	CaseC:Control	NA	NULL	NA	NA	NA	NA	NA	NA	NA	NA	NA	NA	NA	NULL	down
8.64_507.8033n	0.821521	0.0387109	0.105122	0.848087	1.94396	CaseC:Control	NA	NULL	NA	NA	NA	NA	NA	NA	NA	NA	NA	NA	NA	NULL	down
8.64_519.3334n	0.818935	0.015078	0.035463	0.675585	1.84535	CaseC:Control	NA	NULL	NA	NA	NA	NA	NA	NA	NA	NA	NA	NA	NA	NULL	down
8.64_806.4635m/z	0.613309	0.00433059	0.00519604	0.420694	3.12563	CaseC:Control	NA	NULL	NA	NA	NA	NA	NA	NA	NA	NA	NA	NA	NA	NULL	down
8.65_1051.1586m/z	0.694645	0.00572432	0.0114962	0.482629	1.964	CaseC:Control	NA	NULL	NA	NA	NA	NA	NA	NA	NA	NA	NA	NA	NA	NULL	down
8.65_539.3146m/z	0.775875	0.00510194	0.0114962	0.482629	2.33429	CaseC:Control	C13750	C13750	C31H42N2O6	M+H	37.4	0.0492	5.69056	93.2511	Batrachotoxin;	539.315	NA	8.64988	1	NULL	down
8.65_539.8163m/z	0.788594	0.0316623	0.075256	0.77902	2.1083	CaseC:Control	NA	NULL	NA	NA	NA	NA	NA	NA	NA	NA	NA	NA	NA	NULL	down
8.65_996.6179n	0.655817	0.0454947	0.075256	0.77902	2.37686	CaseC:Control	NA	NULL	NA	NA	NA	NA	NA	NA	NA	NA	NA	NA	NA	NULL	down
8.66_267.6111m/z	0.595169	0.0140604	0.0114962	0.482629	2.70673	CaseC:Control	NA	NULL	NA	NA	NA	NA	NA	NA	NA	NA	NA	NA	NA	NULL	down
8.66_642.2472m/z	1.30056	0.00781713	0.0114962	0.482629	1.98256	CaseC:Control	C11365	C11365	C33H39N4O7-	M+K	34.5	0	3.525	76.5433	Irinotecan carboxylate; CPT-11 carboxylate form;	642.247	NA	8.66462	1	NULL	up
8.68_373.2702m/z	1.27678	0.00250985	0.00287947	0.343567	1.90356	CaseC:Control	C03690	C03690	C24H38O4	M+H-H2O	23.1	0	-8.9806	25.3275	Bis(2-ethylhexyl)phthalate; Di(2-ethylhexyl)phthalate; Dioctyl phthalate; DEHP;	373.27	NA	8.67917	1	NULL	up
8.68_373.2702m/z	1.27678	0.00250985	0.00287947	0.343567	1.90356	CaseC:Control	C15375	C15375	C24H38O4	M+H-H2O	23.1	0	-8.9806	25.3275	Apocholic acid; 3alpha,12alpha-Dihydroxy-5beta-chol-8(14)-en-24-oic acid;	373.27	NA	8.67917	1	NULL	up
8.68_373.2702m/z	1.27678	0.00250985	0.00287947	0.343567	1.90356	CaseC:Control	C14227	C14227	C24H38O4	M+H-H2O	23.1	0	-8.9806	25.3275	Di-n-octyl phthalate; Bis(n-octyl) phthalate; Dioctyl 1,2-benzenedicarboxylate;	373.27	NA	8.67917	1	NULL	up
8.68_373.2702m/z	1.27678	0.00250985	0.00287947	0.343567	1.90356	CaseC:Control	C11637	C11637	C24H38O4	M+H-H2O	23.1	0	-8.9806	25.3275	3alpha,12alpha-Dihydroxy-5beta-chol-6-enoate;	373.27	NA	8.67917	1	NULL	up
8.68_373.2702m/z	1.27678	0.00250985	0.00287947	0.343567	1.90356	CaseC:Control	C14577	C14577	C24H38O4	M+H-H2O	23.1	0	-8.9806	25.3275	Diisooctyl phthalate;	373.27	NA	8.67917	1	NULL	up
8.68_373.2702m/z	1.27678	0.00250985	0.00287947	0.343567	1.90356	CaseC:Control	C15057	C15057	C24H36O3	M+H	23	0	-9.41509	25.3321	3-Ethoxyandrosta-3,5-dien-17beta-ol propanoate;	373.27	NA	8.67917	1	NULL	up
8.71_333.6210m/z	0.554126	0.0403512	0.0432571	0.702966	2.74102	CaseC:Control	NA	NULL	NA	NA	NA	NA	NA	NA	NA	NA	NA	NA	NA	NULL	down
8.72_800.4619m/z	0.577638	0.0273955	0.0432571	0.702966	2.54769	CaseC:Control	NA	NULL	NA	NA	NA	NA	NA	NA	NA	NA	NA	NA	NA	NULL	down
8.78_269.2477m/z	1.27751	0.0287984	0.0432571	0.702966	1.80515	CaseC:Control	C13947	C13947	C17H34O3	M+H-H2O	38.1	0	0.711398	91.6132	2-Methoxyhexadecanoic acid; 2-Methoxyhexadecanoate;	269.248	NA	8.78012	1	NULL	up
8.78_269.2477m/z	1.27751	0.0287984	0.0432571	0.702966	1.80515	CaseC:Control	C11849	C11849	C17H34O3	M+H-H2O	38.1	0	0.711398	91.6132	3-Hydroxy-palmitic acid methyl ester;	269.248	NA	8.78012	1	map02020 Two-component system	up
8.78_269.2477m/z	1.27751	0.0287984	0.0432571	0.702966	1.80515	CaseC:Control	C16536	C16536	C17H32O2	M+H	38.2	0	0.75917	91.7479	9E-Heptadecenoic acid; (E)-Heptadec-9-enoic acid;	269.248	NA	8.78012	1	NULL	up
8.78_269.2477m/z	1.27751	0.0287984	0.0432571	0.702966	1.80515	CaseC:Control	C12100	C12100	C17H32O2	M+H	38.2	0	0.75917	91.7479	omega-Cyclohexylundecanoic acid; Cyclohexaneundecanoic acid;	269.248	NA	8.78012	1	NULL	up
8.79_300.6430m/z	0.678517	0.0218729	0.0146896	0.520335	2.41636	CaseC:Control	NA	NULL	NA	NA	NA	NA	NA	NA	NA	NA	NA	NA	NA	NULL	down
8.81_1063.6662m/z	0.696889	0.00665985	0.035463	0.675585	1.96196	CaseC:Control	NA	NULL	NA	NA	NA	NA	NA	NA	NA	NA	NA	NA	NA	NULL	down
8.81_1143.5466m/z	0.60661	0.00763692	0.0185434	0.549514	2.76563	CaseC:Control	NA	NULL	NA	NA	NA	NA	NA	NA	NA	NA	NA	NA	NA	NULL	down
8.81_414.7577m/z	1.47756	0.0483635	0.0524259	0.726908	2.22203	CaseC:Control	NA	NULL	NA	NA	NA	NA	NA	NA	NA	NA	NA	NA	NA	NULL	up
8.81_548.3626m/z	0.756476	0.0479307	0.0288056	0.653022	1.78999	CaseC:Control	NA	NULL	NA	NA	NA	NA	NA	NA	NA	NA	NA	NA	NA	NULL	down
8.82_1041.6867m/z	0.630493	0.00801064	0.0146896	0.520335	2.39307	CaseC:Control	NA	NULL	NA	NA	NA	NA	NA	NA	NA	NA	NA	NA	NA	NULL	down
8.95_1127.6458m/z	0.756947	0.0432961	0.0630128	0.747906	1.56501	CaseC:Control	C19772	C19772	C61H102O12P2	M+K	36.8	1.77	-1.81886	84.1623	alpha-D-Glucopyranosyl-diphospho-ditrans,octacis-undecaprenol;	1127.65	NA	8.9491	1	NULL	down
8.95_1127.6458m/z	0.756947	0.0432961	0.0630128	0.747906	1.56501	CaseC:Control	C04507	C04507	C61H102O12P2	M+K	36.8	1.77	-1.81886	84.1623	alpha-D-Galactosyl-diphosphoundecaprenol;	1127.65	NA	8.9491	1	NULL	down
9.02_790.5846m/z	1.38095	0.0113759	0.0232306	0.601873	1.86124	CaseC:Control	NA	NULL	NA	NA	NA	NA	NA	NA	NA	NA	NA	NA	NA	NULL	up
9.05_819.4790m/z	1.27723	0.0459607	0.0432571	0.702966	1.6613	CaseC:Control	NA	NULL	NA	NA	NA	NA	NA	NA	NA	NA	NA	NA	NA	NULL	up
9.19_433.7843m/z	0.785002	0.0238113	0.035463	0.675585	1.32596	CaseC:Control	NA	NULL	NA	NA	NA	NA	NA	NA	NA	NA	NA	NA	NA	NULL	down
9.21_939.4808m/z	0.672706	0.0246635	0.035463	0.675585	2.15684	CaseC:Control	NA	NULL	NA	NA	NA	NA	NA	NA	NA	NA	NA	NA	NA	NULL	down
9.29_524.6752m/z	0.693552	0.0231386	0.035463	0.675585	1.90291	CaseC:Control	NA	NULL	NA	NA	NA	NA	NA	NA	NA	NA	NA	NA	NA	NULL	down
9.30_1066.7090m/z	0.698028	0.0251046	0.0232306	0.601873	2.05997	CaseC:Control	NA	NULL	NA	NA	NA	NA	NA	NA	NA	NA	NA	NA	NA	NULL	down
9.30_1074.1931m/z	0.590686	0.0191485	0.0185434	0.549514	2.65838	CaseC:Control	NA	NULL	NA	NA	NA	NA	NA	NA	NA	NA	NA	NA	NA	NULL	down
9.30_1092.1998n	0.667268	0.0405489	0.0432571	0.702966	2.14197	CaseC:Control	NA	NULL	NA	NA	NA	NA	NA	NA	NA	NA	NA	NA	NA	NULL	down
9.30_1143.6625m/z	0.635321	0.0321183	0.0185434	0.549514	2.88958	CaseC:Control	NA	NULL	NA	NA	NA	NA	NA	NA	NA	NA	NA	NA	NA	NULL	down
9.30_319.6794n	0.743115	0.022827	0.0232306	0.601873	2.29714	CaseC:Control	NA	NULL	NA	NA	NA	NA	NA	NA	NA	NA	NA	NA	NA	NULL	down
9.30_790.0021n	0.827091	0.0450185	0.0892096	0.815476	1.21296	CaseC:Control	NA	NULL	NA	NA	NA	NA	NA	NA	NA	NA	NA	NA	NA	NULL	down
9.30_813.5153m/z	0.785994	0.0335141	0.0630128	0.747906	1.57122	CaseC:Control	C11311	C11311	C45H74O11	M+Na	31.5	0	3.69356	61.7656	Oligomycin A;	813.515	NA	9.30208	1	NULL	down
9.30_841.0059n	0.732355	0.00628156	0.00684146	0.462973	1.87786	CaseC:Control	NA	NULL	NA	NA	NA	NA	NA	NA	NA	NA	NA	NA	NA	NULL	down
9.32_1058.7213m/z	0.782809	0.041083	0.075256	0.77902	1.2873	CaseC:Control	C16878	C16878	C59H101N3O14	M+H-H2O	34	0	-3.47851	74.2383	Aplyronine A;	1058.72	NA	9.3172	1	NULL	down
9.32_1059.2227m/z	0.727839	0.0228684	0.0089307	0.482629	1.42717	CaseC:Control	NA	NULL	NA	NA	NA	NA	NA	NA	NA	NA	NA	NA	NA	NULL	down
9.38_672.2981m/z	0.789021	0.0457825	0.0524259	0.726908	1.7211	CaseC:Control	C05769	C05769	C36H38N4O8	M+NH4	32.5	0	-7.16265	70.697	Coproporphyrin I;	672.298	NA	9.37562	1	map00860 Porphyrin and chlorophyll metabolism	down
9.38_672.2981m/z	0.789021	0.0457825	0.0524259	0.726908	1.7211	CaseC:Control	C05770	C05770	C36H38N4O8	M+NH4	32.5	0	-7.16265	70.697	Coproporphyrin III;	672.298	NA	9.37562	1	map00860 Porphyrin and chlorophyll metabolism	down
9.38_672.2981m/z	0.789021	0.0457825	0.0524259	0.726908	1.7211	CaseC:Control	C16877	C16877	C35H43ClN2O8	M+NH4	29.1	0	-9.95941	56.4843	Cryptophycin 1; Cryptophycin;	672.298	NA	9.37562	1	NULL	down
9.40_307.2638m/z	0.75329	0.0458431	0.0630128	0.747906	1.71819	CaseC:Control	C03242	C03242	C20H34O2	M+H	39	0	2.21517	97.4136	(8Z,11Z,14Z)-Icosatrienoic acid; Dihomo-gamma-linolenic acid; (Z,Z,Z)-8,11,14-Eicosatrienoic acid; (Z,Z,Z)-8,11,14-Icosatrienoic acid; (Z,Z,Z)-8,11,14-Eicosatrienoate; (Z,Z,Z)-8,11,14-Icosatrienoate; 8,11,14-Eicosatrienoate; 8,11,14-Icosatrienoate;	307.264	NA	9.4042	1	map00591 Linoleic acid metabolism; map01040 Biosynthesis of unsaturated fatty acids; map01100 Metabolic pathways	down
9.40_307.2638m/z	0.75329	0.0458431	0.0630128	0.747906	1.71819	CaseC:Control	C09072	C09072	C20H34O2	M+H	39	0	2.21517	97.4136	2,7,11-Cembratrien-4,6-diol;	307.264	NA	9.4042	1	NULL	down
9.40_307.2638m/z	0.75329	0.0458431	0.0630128	0.747906	1.71819	CaseC:Control	C16522	C16522	C20H34O2	M+H	39	0	2.21517	97.4136	Icosatrienoic acid; Eicosatrienoic acid; ETA; 11,14,17-Icosatrienoic acid; (11Z,14Z,17Z)-Icosa-11,14,17-trienoic acid; 11,14,17-Eicosatrienoic acid; (11Z,14Z,17Z)-Eicosa-11,14,17-trienoic acid;	307.264	NA	9.4042	1	map01040 Biosynthesis of unsaturated fatty acids	down
9.40_307.2638m/z	0.75329	0.0458431	0.0630128	0.747906	1.71819	CaseC:Control	C15058	C15058	C20H34O2	M+H	39	0	2.21517	97.4136	2alpha-Methyl-5alpha-androstane-3beta,17beta-diol;	307.264	NA	9.4042	1	NULL	down
9.40_307.2638m/z	0.75329	0.0458431	0.0630128	0.747906	1.71819	CaseC:Control	C15376	C15376	C20H34O2	M+H	39	0	2.21517	97.4136	17alpha-Methyl-5alpha-androstane-3alpha,17beta-diol;	307.264	NA	9.4042	1	NULL	down
9.40_307.2638m/z	0.75329	0.0458431	0.0630128	0.747906	1.71819	CaseC:Control	C13273	C13273	C20H34O2	M+H	39	0	2.21517	97.4136	Plaunotol; 18-Hydroxygeranylgeraniol;	307.264	NA	9.4042	1	map00904 Diterpenoid biosynthesis; map01110 Biosynthesis of secondary metabolites	down
9.40_307.2638m/z	0.75329	0.0458431	0.0630128	0.747906	1.71819	CaseC:Control	C14882	C14882	C20H34O2	M+H	39	0	2.21517	97.4136	2alpha-Methyl-5alpha-androstane-3alpha,17beta-diol;	307.264	NA	9.4042	1	NULL	down
9.40_307.2638m/z	0.75329	0.0458431	0.0630128	0.747906	1.71819	CaseC:Control	C15399	C15399	C20H34O2	M+H	39	0	2.21517	97.4136	17-Methyl-5alpha-androstane-11beta,17beta-diol;	307.264	NA	9.4042	1	NULL	down
