# Supplementary material for: UPLC-MS-Based Serum Metabolomics Reveals Potential Biomarkers of Ang II-Induced Hypertension in Mice
Source: Front Cardiovasc Med. 2021 May 5;8:683859. doi: 10.3389/fcvm.2021.683859 (PMC8131677; doi:10.3389/fcvm.2021.683859)
Supplement: Supplementary file 2 [file Data_Sheet_2.xlsx]

## Sheet: Sheet1
Compound.ID	ratio	t.test_p.value	wilcox.test_p.value	wilcox.test_p.value_BHcorrect	VIP	sample	ID	KEGG.ID	Formula	Adducts	Score	Fragmentation.Score	Mass.Error..ppm.	Isotope.Similarity	Description	m.z	Neutral.mass..Da.	Retention.time..min.	Charge	Pathway	label
0.50_747.8674m/z	0.734026	0.00708589	0.0114962	0.593596	2.01943	CaseC:Control	NA	NULL	NA	NA	NA	NA	NA	NA	NA	NA	NA	NA	NA	NULL	down
0.53_1138.1206m/z	0.718594	0.0455212	0.0630128	0.811589	2.28588	CaseC:Control	NA	NULL	NA	NA	NA	NA	NA	NA	NA	NA	NA	NA	NA	NULL	down
0.55_1021.2905m/z	1.58399	0.00968973	0.0232306	0.658543	2.44621	CaseC:Control	NA	NULL	NA	NA	NA	NA	NA	NA	NA	NA	NA	NA	NA	NULL	up
0.55_1047.2896m/z	1.27128	0.0416274	0.0630128	0.811589	1.36789	CaseC:Control	NA	NULL	NA	NA	NA	NA	NA	NA	NA	NA	NA	NA	NA	NULL	up
0.55_1096.7579m/z	1.31309	0.0228282	0.0232306	0.658543	1.72588	CaseC:Control	NA	NULL	NA	NA	NA	NA	NA	NA	NA	NA	NA	NA	NA	NULL	up
0.55_1156.7567m/z	1.38947	0.00631792	0.0089307	0.586889	2.04203	CaseC:Control	NA	NULL	NA	NA	NA	NA	NA	NA	NA	NA	NA	NA	NA	NULL	up
0.55_1190.7481m/z	1.21722	0.0481692	0.0432571	0.762669	1.39507	CaseC:Control	NA	NULL	NA	NA	NA	NA	NA	NA	NA	NA	NA	NA	NA	NULL	up
0.56_1060.7895m/z	1.22179	0.0335066	0.0146896	0.615581	1.49895	CaseC:Control	NA	NULL	NA	NA	NA	NA	NA	NA	NA	NA	NA	NA	NA	NULL	up
0.56_1154.7636m/z	1.36298	0.0177456	0.0146896	0.615581	1.5283	CaseC:Control	NA	NULL	NA	NA	NA	NA	NA	NA	NA	NA	NA	NA	NA	NULL	up
0.56_748.8331m/z	1.28849	0.0360994	0.035463	0.74037	1.58285	CaseC:Control	NA	NULL	NA	NA	NA	NA	NA	NA	NA	NA	NA	NA	NA	NULL	up
0.56_804.3413m/z	0.702376	0.021382	0.0232306	0.658543	2.20628	CaseC:Control	NA	NULL	NA	NA	NA	NA	NA	NA	NA	NA	NA	NA	NA	NULL	down
0.58_463.8579n	1.21114	0.0112461	0.00684146	0.534651	1.41553	CaseC:Control	NA	NULL	NA	NA	NA	NA	NA	NA	NA	NA	NA	NA	NA	NULL	up
0.58_580.7609m/z	0.808891	0.0320595	0.035463	0.74037	1.49866	CaseC:Control	NA	NULL	NA	NA	NA	NA	NA	NA	NA	NA	NA	NA	NA	NULL	down
0.59_215.0328m/z	0.701611	0.0105447	0.000725	0.220753	2.04681	CaseC:Control	C11434	C11434	C5H13O7P	M-H	39.4	0.278	0.636754	97.4967	2-C-Methyl-D-erythritol 4-phosphate;	215.033	NA	0.590467	1	map00900 Terpenoid backbone biosynthesis; map01060 Biosynthesis of plant secondary metabolites; map01062 Biosynthesis of terpenoids and steroids; map01070 Biosynthesis of plant hormones; map01100 Metabolic pathways; map01110 Biosynthesis of secondary metabolites; map01130 Biosynthesis of antibiotics	down
0.59_215.0328m/z	0.701611	0.0105447	0.000725	0.220753	2.04681	CaseC:Control	C01680	C01680	C6H12O6	M+Cl	40.3	3.25	-0.215958	98.58	D-Fuconate;	215.033	NA	0.590467	1	NULL	down
0.59_215.0328m/z	0.701611	0.0105447	0.000725	0.220753	2.04681	CaseC:Control	C00031	C00031	C6H12O6	M+Cl	40.1	2.12	-0.215958	98.58	D-Glucose; Grape sugar; Dextrose; Glucose; D-Glucopyranose;	215.033	NA	0.590467	1	map00010 Glycolysis / Gluconeogenesis; map00030 Pentose phosphate pathway; map00052 Galactose metabolism; map00500 Starch and sucrose metabolism; map00520 Amino sugar and nucleotide sugar metabolism; map00521 Streptomycin biosynthesis; map00524 Butirosin and neomycin biosynthesis; map00901 Indole alkaloid biosynthesis; map01100 Metabolic pathways; map01110 Biosynthesis of secondary metabolites; m…	down
0.59_215.0328m/z	0.701611	0.0105447	0.000725	0.220753	2.04681	CaseC:Control	C01934	C01934	C6H12O6	M+Cl	40.3	3.25	-0.215958	98.58	L-Rhamnonate; 6-Deoxy-L-mannonic acid;	215.033	NA	0.590467	1	map00051 Fructose and mannose metabolism; map01120 Microbial metabolism in diverse environments	down
0.59_215.0328m/z	0.701611	0.0105447	0.000725	0.220753	2.04681	CaseC:Control	C01720	C01720	C6H12O6	M+Cl	40.3	3.25	-0.215958	98.58	L-Fuconate;	215.033	NA	0.590467	1	map00051 Fructose and mannose metabolism; map01120 Microbial metabolism in diverse environments	down
0.59_215.0328m/z	0.701611	0.0105447	0.000725	0.220753	2.04681	CaseC:Control	C05003	C05003	C6H12O6	M+Cl	40.3	2.94	-0.215958	98.58	D-Fructose; D-arabino-Hex-2-ulopyranose;	215.033	NA	0.590467	1	NULL	down
0.59_215.0328m/z	0.701611	0.0105447	0.000725	0.220753	2.04681	CaseC:Control	C19891	C19891	C6H12O6	M+Cl	39.7	0	-0.215958	98.58	1D-chiro-Inositol; 1,2,4/3,5,6-Cyclohexane-1,2,3,4,5,6-hexol; (+)-Inositol;	215.033	NA	0.590467	1	map00562 Inositol phosphate metabolism; map01120 Microbial metabolism in diverse environments	down
0.59_215.0328m/z	0.701611	0.0105447	0.000725	0.220753	2.04681	CaseC:Control	C21050	C21050	C6H12O6	M+Cl	40.1	2.12	-0.215958	98.58	L-Idose; L-Idopyranose;	215.033	NA	0.590467	1	NULL	down
0.59_215.0328m/z	0.701611	0.0105447	0.000725	0.220753	2.04681	CaseC:Control	C06467	C06467	C6H12O6	M+Cl	40.1	2.12	-0.215958	98.58	D-Talose; D-talo-Hexose;	215.033	NA	0.590467	1	NULL	down
0.59_215.0328m/z	0.701611	0.0105447	0.000725	0.220753	2.04681	CaseC:Control	C06152	C06152	C6H12O6	M+Cl	39.7	0	-0.215958	98.58	muco-Inositol;	215.033	NA	0.590467	1	NULL	down
0.59_215.0328m/z	0.701611	0.0105447	0.000725	0.220753	2.04681	CaseC:Control	C00137	C00137	C6H12O6	M+Cl	39.7	0	-0.215958	98.58	myo-Inositol; D-myo-Inositol; 1D-myo-Inositol; L-myo-Inositol; 1L-myo-Inositol; meso-Inositol; Inositol; Dambose; Cyclohexitol; Meat sugar; Bios I;	215.033	NA	0.590467	1	map00052 Galactose metabolism; map00053 Ascorbate and aldarate metabolism; map00521 Streptomycin biosynthesis; map00562 Inositol phosphate metabolism; map01100 Metabolic pathways; map01120 Microbial metabolism in diverse environments; map01130 Biosynthesis of antibiotics; map02010 ABC transporters; map04070 Phosphatidylinositol signaling system	down
0.59_215.0328m/z	0.701611	0.0105447	0.000725	0.220753	2.04681	CaseC:Control	C06468	C06468	C6H12O6	M+Cl	40.3	2.94	-0.215958	98.58	D-Psicose; D-ribo-Hex-2-ulose; D-ribo-2-Hexulose; D-ribo-2-Ketohexulose; D-erythro-Hexulose; D-Pseudofructose; D-Allulose; D-Altrulose;	215.033	NA	0.590467	1	NULL	down
0.59_215.0328m/z	0.701611	0.0105447	0.000725	0.220753	2.04681	CaseC:Control	C06153	C06153	C6H12O6	M+Cl	39.7	0	-0.215958	98.58	scyllo-Inositol; Scyllitol;	215.033	NA	0.590467	1	map00562 Inositol phosphate metabolism; map01120 Microbial metabolism in diverse environments	down
0.59_215.0328m/z	0.701611	0.0105447	0.000725	0.220753	2.04681	CaseC:Control	C02782	C02782	C6H12O6	M+Cl	39.7	0.173	-0.215958	98.58	2-Deoxy-D-gluconate;	215.033	NA	0.590467	1	NULL	down
0.59_215.0328m/z	0.701611	0.0105447	0.000725	0.220753	2.04681	CaseC:Control	C06464	C06464	C6H12O6	M+Cl	40.1	2.12	-0.215958	98.58	D-Altrose; D-altro-Hexose;	215.033	NA	0.590467	1	NULL	down
0.59_215.0328m/z	0.701611	0.0105447	0.000725	0.220753	2.04681	CaseC:Control	C06465	C06465	C6H12O6	M+Cl	40.1	2.12	-0.215958	98.58	D-Gulose; D-gulo-Hexose;	215.033	NA	0.590467	1	NULL	down
0.59_215.0328m/z	0.701611	0.0105447	0.000725	0.220753	2.04681	CaseC:Control	C06151	C06151	C6H12O6	M+Cl	39.7	0	-0.215958	98.58	1L-chiro-Inositol; (-)-Inositol;	215.033	NA	0.590467	1	NULL	down
0.59_215.0328m/z	0.701611	0.0105447	0.000725	0.220753	2.04681	CaseC:Control	C06466	C06466	C6H12O6	M+Cl	40.1	2.12	-0.215958	98.58	D-Idose; D-ido-Hexose;	215.033	NA	0.590467	1	NULL	down
0.59_215.0328m/z	0.701611	0.0105447	0.000725	0.220753	2.04681	CaseC:Control	C21032	C21032	C6H12O6	M+Cl	40.1	2.12	-0.215958	98.58	L-Altrose; L-Altropyranose;	215.033	NA	0.590467	1	NULL	down
0.59_215.0328m/z	0.701611	0.0105447	0.000725	0.220753	2.04681	CaseC:Control	C00124	C00124	C6H12O6	M+Cl	40.1	2.12	-0.215958	98.58	D-Galactose; D-Galactopyranose;	215.033	NA	0.590467	1	map00052 Galactose metabolism; map01100 Metabolic pathways; map02030 Bacterial chemotaxis; map02060 Phosphotransferase system (PTS); map04973 Carbohydrate digestion and absorption; map04978 Mineral absorption	down
0.59_215.0328m/z	0.701611	0.0105447	0.000725	0.220753	2.04681	CaseC:Control	C08356	C08356	C6H12O6	M+Cl	40.3	2.94	-0.215958	98.58	alpha-L-Sorbopyranose;	215.033	NA	0.590467	1	NULL	down
0.59_215.0328m/z	0.701611	0.0105447	0.000725	0.220753	2.04681	CaseC:Control	C00095	C00095	C6H12O6	M+Cl	40.1	2.12	-0.215958	98.58	D-Fructose; Levulose; Fruit sugar; D-arabino-Hexulose;	215.033	NA	0.590467	1	map00051 Fructose and mannose metabolism; map00052 Galactose metabolism; map00500 Starch and sucrose metabolism; map01100 Metabolic pathways; map01120 Microbial metabolism in diverse environments; map02010 ABC transporters; map02060 Phosphotransferase system (PTS); map04742 Taste transduction; map04931 Insulin resistance; map04973 Carbohydrate digestion and absorption	down
0.59_215.0328m/z	0.701611	0.0105447	0.000725	0.220753	2.04681	CaseC:Control	C02336	C02336	C6H12O6	M+Cl	40.1	2.12	-0.215958	98.58	beta-D-Fructose; beta-Fruit sugar; beta-D-arabino-Hexulose; beta-Levulose; Fructose;	215.033	NA	0.590467	1	map00500 Starch and sucrose metabolism; map00520 Amino sugar and nucleotide sugar metabolism; map01100 Metabolic pathways	down
0.59_215.0328m/z	0.701611	0.0105447	0.000725	0.220753	2.04681	CaseC:Control	C00795	C00795	C6H12O6	M+Cl	40.3	2.94	-0.215958	98.58	D-Tagatose; lyxo-Hexulose;	215.033	NA	0.590467	1	map00052 Galactose metabolism	down
0.59_215.0328m/z	0.701611	0.0105447	0.000725	0.220753	2.04681	CaseC:Control	C00984	C00984	C6H12O6	M+Cl	40.1	2.12	-0.215958	98.58	alpha-D-Galactose;	215.033	NA	0.590467	1	map00052 Galactose metabolism; map00520 Amino sugar and nucleotide sugar metabolism; map01100 Metabolic pathways	down
0.59_215.0328m/z	0.701611	0.0105447	0.000725	0.220753	2.04681	CaseC:Control	C00936	C00936	C6H12O6	M+Cl	40.1	2.12	-0.215958	98.58	alpha-D-Mannose;	215.033	NA	0.590467	1	NULL	down
0.59_215.0328m/z	0.701611	0.0105447	0.000725	0.220753	2.04681	CaseC:Control	C01825	C01825	C6H12O6	M+Cl	40.1	2.12	-0.215958	98.58	L-Galactose;	215.033	NA	0.590467	1	map00053 Ascorbate and aldarate metabolism; map01100 Metabolic pathways; map01110 Biosynthesis of secondary metabolites	down
0.59_215.0328m/z	0.701611	0.0105447	0.000725	0.220753	2.04681	CaseC:Control	C01487	C01487	C6H12O6	M+Cl	40.1	2.12	-0.215958	98.58	D-Allose;	215.033	NA	0.590467	1	map00051 Fructose and mannose metabolism; map01120 Microbial metabolism in diverse environments; map02010 ABC transporters	down
0.59_215.0328m/z	0.701611	0.0105447	0.000725	0.220753	2.04681	CaseC:Control	C00221	C00221	C6H12O6	M+Cl	40.1	2.12	-0.215958	98.58	beta-D-Glucose;	215.033	NA	0.590467	1	map00010 Glycolysis / Gluconeogenesis; map00030 Pentose phosphate pathway; map00500 Starch and sucrose metabolism; map01100 Metabolic pathways; map01110 Biosynthesis of secondary metabolites; map01120 Microbial metabolism in diverse environments; map01130 Biosynthesis of antibiotics; map01200 Carbon metabolism	down
0.59_215.0328m/z	0.701611	0.0105447	0.000725	0.220753	2.04681	CaseC:Control	C00764	C00764	C6H12O6	M+Cl	40.3	2.94	-0.215958	98.58	D-Sorbose; D-xylo-Hexulose;	215.033	NA	0.590467	1	NULL	down
0.59_215.0328m/z	0.701611	0.0105447	0.000725	0.220753	2.04681	CaseC:Control	C02209	C02209	C6H12O6	M+Cl	40.1	2.12	-0.215958	98.58	beta-D-Mannose;	215.033	NA	0.590467	1	NULL	down
0.59_215.0328m/z	0.701611	0.0105447	0.000725	0.220753	2.04681	CaseC:Control	C15923	C15923	C6H12O6	M+Cl	40.1	2.12	-0.215958	98.58	L-Gulose;	215.033	NA	0.590467	1	map00053 Ascorbate and aldarate metabolism	down
0.59_215.0328m/z	0.701611	0.0105447	0.000725	0.220753	2.04681	CaseC:Control	C00267	C00267	C6H12O6	M+Cl	40.1	2.12	-0.215958	98.58	alpha-D-Glucose;	215.033	NA	0.590467	1	map00010 Glycolysis / Gluconeogenesis; map00051 Fructose and mannose metabolism; map00052 Galactose metabolism; map00500 Starch and sucrose metabolism; map00520 Amino sugar and nucleotide sugar metabolism; map01060 Biosynthesis of plant secondary metabolites; map01061 Biosynthesis of phenylpropanoids; map01062 Biosynthesis of terpenoids and steroids; map01063 Biosynthesis of alkaloids derived fro…	down
0.59_215.0328m/z	0.701611	0.0105447	0.000725	0.220753	2.04681	CaseC:Control	C00962	C00962	C6H12O6	M+Cl	40.1	2.12	-0.215958	98.58	beta-D-Galactose;	215.033	NA	0.590467	1	NULL	down
0.59_215.0328m/z	0.701611	0.0105447	0.000725	0.220753	2.04681	CaseC:Control	C21066	C21066	C6H12O6	M+Cl	39.7	0	-0.215958	98.58	D-Galactofuranose;	215.033	NA	0.590467	1	NULL	down
0.59_215.0328m/z	0.701611	0.0105447	0.000725	0.220753	2.04681	CaseC:Control	C00738	C00738	C6H12O6	M+Cl	40.1	2.12	-0.215958	98.58	D-Hexose; Hexose;	215.033	NA	0.590467	1	NULL	down
0.59_215.0328m/z	0.701611	0.0105447	0.000725	0.220753	2.04681	CaseC:Control	C00247	C00247	C6H12O6	M+Cl	40.3	2.94	-0.215958	98.58	L-Sorbose; L-xylo-Hexulose;	215.033	NA	0.590467	1	map00051 Fructose and mannose metabolism	down
0.59_215.0328m/z	0.701611	0.0105447	0.000725	0.220753	2.04681	CaseC:Control	C00159	C00159	C6H12O6	M+Cl	40.1	2.12	-0.215958	98.58	D-Mannose; Mannose; Seminose; Carubinose;	215.033	NA	0.590467	1	map00051 Fructose and mannose metabolism; map00052 Galactose metabolism; map00520 Amino sugar and nucleotide sugar metabolism; map01100 Metabolic pathways; map02010 ABC transporters; map02060 Phosphotransferase system (PTS); map04142 Lysosome	down
0.59_215.0328m/z	0.701611	0.0105447	0.000725	0.220753	2.04681	CaseC:Control	C00737	C00737	C6H12O6	M+Cl	40.1	2.12	-0.215958	98.58	D-Aldose; D-Aldose1; D-Aldose2;	215.033	NA	0.590467	1	NULL	down
0.59_215.0328m/z	0.701611	0.0105447	0.000725	0.220753	2.04681	CaseC:Control	C10906	C10906	C6H12O6	M+Cl	39.7	0	-0.215958	98.58	D-Fructose;	215.033	NA	0.590467	1	NULL	down
0.59_215.0328m/z	0.701611	0.0105447	0.000725	0.220753	2.04681	CaseC:Control	C01719	C01719	C6H12O6	M+Cl	40.1	2.12	-0.215958	98.58	L-Fructose; L-arabino-Hexulose;	215.033	NA	0.590467	1	NULL	down
0.59_215.0328m/z	0.701611	0.0105447	0.000725	0.220753	2.04681	CaseC:Control	C01452	C01452	C6H12O6	M+Cl	39.7	0	-0.215958	98.58	Sorbose; xylo-Hexulose;	215.033	NA	0.590467	1	map02060 Phosphotransferase system (PTS)	down
0.59_215.0328m/z	0.701611	0.0105447	0.000725	0.220753	2.04681	CaseC:Control	C01582	C01582	C6H12O6	M+Cl	39.7	0	-0.215958	98.58	Galactose;	215.033	NA	0.590467	1	NULL	down
0.59_215.0328m/z	0.701611	0.0105447	0.000725	0.220753	2.04681	CaseC:Control	C08351	C08351	C6H12O6	M+Cl	40.3	2.94	-0.215958	98.58	beta-D-Hamamelopyranose; beta-D-Hamamelose;	215.033	NA	0.590467	1	NULL	down
0.59_215.0328m/z	0.701611	0.0105447	0.000725	0.220753	2.04681	CaseC:Control	C01906	C01906	C6H12O6	M+Cl	40.3	2.94	-0.215958	98.58	D-Hamamelose; Hamamelose;	215.033	NA	0.590467	1	NULL	down
0.59_215.0328m/z	0.701611	0.0105447	0.000725	0.220753	2.04681	CaseC:Control	C13747	C13747	C7H8N4O2	M+Cl	38	1.48	-7.64336	97.2464	1,7-Dimethylxanthine; Paraxanthine;	215.033	NA	0.590467	1	map00232 Caffeine metabolism; map01060 Biosynthesis of plant secondary metabolites; map01100 Metabolic pathways; map01110 Biosynthesis of secondary metabolites; map01120 Microbial metabolism in diverse environments	down
0.59_215.0328m/z	0.701611	0.0105447	0.000725	0.220753	2.04681	CaseC:Control	C07130	C07130	C7H8N4O2	M+Cl	38	1.48	-7.64336	97.2464	Theophylline; 1,3-Dimethylxanthine;	215.033	NA	0.590467	1	map00232 Caffeine metabolism; map01060 Biosynthesis of plant secondary metabolites; map01065 Biosynthesis of alkaloids derived from histidine and purine; map01100 Metabolic pathways; map01110 Biosynthesis of secondary metabolites; map01120 Microbial metabolism in diverse environments	down
0.59_215.0328m/z	0.701611	0.0105447	0.000725	0.220753	2.04681	CaseC:Control	C07480	C07480	C7H8N4O2	M+Cl	38	1.48	-7.64336	97.2464	Theobromine; 3,7-Dimethylxanthine;	215.033	NA	0.590467	1	map00232 Caffeine metabolism; map01060 Biosynthesis of plant secondary metabolites; map01065 Biosynthesis of alkaloids derived from histidine and purine; map01100 Metabolic pathways; map01110 Biosynthesis of secondary metabolites; map01120 Microbial metabolism in diverse environments	down
0.59_217.0300m/z	0.709295	0.0110253	0.000725	0.220753	1.99527	CaseC:Control	C19230	C19230	C6H14O4S	M+Cl	38.3	0	-3.47108	95.39	Diisopropyl sulfate;	217.03	NA	0.590467	1	NULL	down
0.59_242.0798m/z	0.770872	0.014326	0.0288056	0.691214	1.54898	CaseC:Control	C05711	C05711	C9H13N3O5	M-H	38.5	1.33	6.55684	98.5117	gamma-Glutamyl-beta-cyanoalanine;	242.08	NA	0.590467	1	map00460 Cyanoamino acid metabolism	down
0.59_242.0798m/z	0.770872	0.014326	0.0288056	0.691214	1.54898	CaseC:Control	C02961	C02961	C9H13N3O5	M-H	38.6	1.82	6.55684	98.5117	Cytosine arabinoside; Cytarabine; Cytosine-1-beta-D-arabinofuranoside;	242.08	NA	0.590467	1	NULL	down
0.59_242.0798m/z	0.770872	0.014326	0.0288056	0.691214	1.54898	CaseC:Control	C00475	C00475	C9H13N3O5	M-H	38.6	1.82	6.55684	98.5117	Cytidine;	242.08	NA	0.590467	1	map00240 Pyrimidine metabolism; map01100 Metabolic pathways	down
0.59_242.0798m/z	0.770872	0.014326	0.0288056	0.691214	1.54898	CaseC:Control	C02852	C02852	C8H17NO5	M+Cl	39.4	0	-1.13938	98.2408	N-Ethylglycocyamine;	242.08	NA	0.590467	1	NULL	down
0.59_242.0798m/z	0.770872	0.014326	0.0288056	0.691214	1.54898	CaseC:Control	C12067	C12067	C8H17NO5	M+Cl	39.4	0	-1.13938	98.2408	2-Deoxy-2-dimethylamino-alpha-D-Glucose;	242.08	NA	0.590467	1	NULL	down
0.59_242.0798m/z	0.770872	0.014326	0.0288056	0.691214	1.54898	CaseC:Control	C07708	C07708	C8H17NO5	M+Cl	39.4	0	-1.13938	98.2408	Miglitol;	242.08	NA	0.590467	1	NULL	down
0.59_292.0707m/z	0.831281	0.0111141	0.0288056	0.691214	1.22698	CaseC:Control	C19289	C19289	C11H11N5O5	M-H	38.5	2.62	6.77566	97.7596	Panfuran S; Dihydroxymethylfuratrizine;	292.071	NA	0.590467	1	NULL	down
0.59_294.0690m/z	0.781709	0.0208651	0.035463	0.74037	1.63149	CaseC:Control	NA	NULL	NA	NA	NA	NA	NA	NA	NA	NA	NA	NA	NA	NULL	down
0.59_381.1095m/z	0.626659	0.00489109	0.00208924	0.389745	2.38719	CaseC:Control	C09174	C09174	C19H22O6	M+Cl	36.7	0	-4.53486	88.9801	Ponalactone A;	381.109	NA	0.590467	1	NULL	down
0.59_381.1095m/z	0.626659	0.00489109	0.00208924	0.389745	2.38719	CaseC:Control	C09190	C09190	C19H22O6	M+Cl	38.3	7.76	-4.53486	88.9801	Strigol;	381.109	NA	0.590467	1	map00906 Carotenoid biosynthesis; map01070 Biosynthesis of plant hormones; map01110 Biosynthesis of secondary metabolites	down
0.59_381.1095m/z	0.626659	0.00489109	0.00208924	0.389745	2.38719	CaseC:Control	C11869	C11869	C19H22O6	M+Cl	37.7	4.67	-4.53486	88.9801	Gibberellin A34-catabolite;	381.109	NA	0.590467	1	map00904 Diterpenoid biosynthesis	down
0.59_381.1095m/z	0.626659	0.00489109	0.00208924	0.389745	2.38719	CaseC:Control	C11856	C11856	C19H22O6	M+Cl	36.7	0	-4.53486	88.9801	Gibberellin A6;	381.109	NA	0.590467	1	NULL	down
0.59_381.1095m/z	0.626659	0.00489109	0.00208924	0.389745	2.38719	CaseC:Control	C09512	C09512	C19H22O6	M+Cl	36.7	0	-4.53486	88.9801	Molephantin;	381.109	NA	0.590467	1	NULL	down
0.59_381.1095m/z	0.626659	0.00489109	0.00208924	0.389745	2.38719	CaseC:Control	C09104	C09104	C19H22O6	M+Cl	36.7	0	-4.53486	88.9801	Hallactone A;	381.109	NA	0.590467	1	NULL	down
0.59_381.1095m/z	0.626659	0.00489109	0.00208924	0.389745	2.38719	CaseC:Control	C11855	C11855	C19H22O6	M+Cl	36.7	0	-4.53486	88.9801	Gibberellin A29-catabolite;	381.109	NA	0.590467	1	map00904 Diterpenoid biosynthesis	down
0.59_381.1095m/z	0.626659	0.00489109	0.00208924	0.389745	2.38719	CaseC:Control	C09385	C09385	C19H22O6	M+Cl	36.7	0	-4.53486	88.9801	Cynaropicrin;	381.109	NA	0.590467	1	NULL	down
0.59_381.1095m/z	0.626659	0.00489109	0.00208924	0.389745	2.38719	CaseC:Control	C01699	C01699	C19H22O6	M+Cl	36.7	0	-4.53486	88.9801	Gibberellin A3; Gibberellic acid; Gibberellin;	381.109	NA	0.590467	1	map00904 Diterpenoid biosynthesis	down
0.59_381.1095m/z	0.626659	0.00489109	0.00208924	0.389745	2.38719	CaseC:Control	C09062	C09062	C19H22O6	M+Cl	36.7	0	-4.53486	88.9801	Antheridic acid; Antheridiogen-An;	381.109	NA	0.590467	1	NULL	down
0.59_381.1095m/z	0.626659	0.00489109	0.00208924	0.389745	2.38719	CaseC:Control	C09547	C09547	C19H22O6	M+Cl	36.7	0	-4.53486	88.9801	Saupirin;	381.109	NA	0.590467	1	NULL	down
0.60_275.0378m/z	1.74274	8.33e-05	4.33e-05	0.0417343	3.19334	CaseC:Control	NA	NULL	NA	NA	NA	NA	NA	NA	NA	NA	NA	NA	NA	NULL	up
0.60_303.9211m/z	0.719409	0.0113711	0.000325	0.125203	2.03306	CaseC:Control	NA	NULL	NA	NA	NA	NA	NA	NA	NA	NA	NA	NA	NA	NULL	down
0.60_305.9186m/z	0.745661	0.00914641	0.00105003	0.276016	1.84953	CaseC:Control	NA	NULL	NA	NA	NA	NA	NA	NA	NA	NA	NA	NA	NA	NULL	down
0.63_133.0138m/z	0.621854	0.0114613	0.0089307	0.586889	2.36255	CaseC:Control	C03064	C03064	C4H6O5	M-H	38.7	0	-3.16537	97.005	3-Dehydro-L-threonate;	133.014	NA	0.633333	1	map00053 Ascorbate and aldarate metabolism	down
0.63_133.0138m/z	0.621854	0.0114613	0.0089307	0.586889	2.36255	CaseC:Control	C00149	C00149	C4H6O5	M-H	38.7	0	-3.16537	97.005	(S)-Malate; L-Malate; L-Apple acid; L-Malic acid; L-2-Hydroxybutanedioic acid; Malate; Malic acid;	133.014	NA	0.633333	1	map00020 Citrate cycle (TCA cycle); map00620 Pyruvate metabolism; map00630 Glyoxylate and dicarboxylate metabolism; map00680 Methane metabolism; map00710 Carbon fixation in photosynthetic organisms; map00720 Carbon fixation pathways in prokaryotes; map01060 Biosynthesis of plant secondary metabolites; map01061 Biosynthesis of phenylpropanoids; map01062 Biosynthesis of terpenoids and steroids; map…	down
0.63_133.0138m/z	0.621854	0.0114613	0.0089307	0.586889	2.36255	CaseC:Control	C00497	C00497	C4H6O5	M-H	38.7	0	-3.16537	97.005	(R)-Malate; D-Malate; D-Malic acid;	133.014	NA	0.633333	1	map00650 Butanoate metabolism	down
0.63_133.0138m/z	0.621854	0.0114613	0.0089307	0.586889	2.36255	CaseC:Control	C03668	C03668	C3H4O5.[CH2]n	M-H	19.3	0	-3.16537	NA	2-Hydroxydicarboxylic acid;	133.014	NA	0.633333	1	NULL	down
0.63_133.0138m/z	0.621854	0.0114613	0.0089307	0.586889	2.36255	CaseC:Control	C00711	C00711	C4H6O5	M-H	38.7	0	-3.16537	97.005	Malate; Malic acid; 2-Hydroxybutanedioic acid;	133.014	NA	0.633333	1	NULL	down
0.63_153.0300m/z	1.26718	0.047687	0.0114962	0.593596	1.78321	CaseC:Control	C19321	C19321	C6H6N2O3	M-H	31.5	0	-3.71124	61.7103	2-Amino-4-nitrophenol;	153.03	NA	0.633333	1	NULL	up
0.63_153.0300m/z	1.26718	0.047687	0.0114962	0.593596	1.78321	CaseC:Control	C03277	C03277	C6H6N2O3	M-H	31.5	0	-3.71124	61.7103	Imidazol-5-yl-pyruvate; 3-(Imidazol-5-yl)pyruvate; Imidazole pyruvate; Imidazole pyruvic acid;	153.03	NA	0.633333	1	map00340 Histidine metabolism	up
0.63_153.0300m/z	1.26718	0.047687	0.0114962	0.593596	1.78321	CaseC:Control	C03762	C03762	C6H6N2O3	M-H	31.5	0	-3.71124	61.7103	3-Imidazole-2-oxopropanoate;	153.03	NA	0.633333	1	NULL	up
0.63_153.0300m/z	1.26718	0.047687	0.0114962	0.593596	1.78321	CaseC:Control	C19323	C19323	C6H6N2O3	M-H	31.5	0	-3.71124	61.7103	4-Amino-2-nitrophenol;	153.03	NA	0.633333	1	NULL	up
0.63_153.0300m/z	1.26718	0.047687	0.0114962	0.593596	1.78321	CaseC:Control	C19322	C19322	C6H6N2O3	M-H	31.5	0	-3.71124	61.7103	2-Amino-5-nitrophenol;	153.03	NA	0.633333	1	NULL	up
0.63_156.0776m/z	2.96392	0.00425636	1.08e-05	0.0125203	2.92799	CaseC:Control	NA	NULL	NA	NA	NA	NA	NA	NA	NA	NA	NA	NA	NA	NULL	up
0.63_175.0245m/z	0.426519	0.0498079	0.105122	0.863527	3.90982	CaseC:Control	C03387	C03387	C6H8O6	M-H	39.3	1.03	-1.94013	97.925	D-Glucurono-6,2-lactone;	175.024	NA	0.633333	1	NULL	down
0.63_175.0245m/z	0.426519	0.0498079	0.105122	0.863527	3.90982	CaseC:Control	C06033	C06033	C6H8O6	M-H	39.3	1.03	-1.94013	97.925	Parapyruvate; 4-Hydroxy-4-methyl-2-oxoglutarate;	175.024	NA	0.633333	1	map00362 Benzoate degradation; map00660 C5-Branched dibasic acid metabolism; map01120 Microbial metabolism in diverse environments	down
0.63_175.0245m/z	0.426519	0.0498079	0.105122	0.863527	3.90982	CaseC:Control	C06440	C06440	C6H8O6	M-H	39.3	1.03	-1.94013	97.925	2-Dehydro-D-glucono-1,5-lactone;	175.024	NA	0.633333	1	NULL	down
0.63_175.0245m/z	0.426519	0.0498079	0.105122	0.863527	3.90982	CaseC:Control	C02670	C02670	C6H8O6	M-H	39.3	1.03	-1.94013	97.925	D-Glucuronolactone; Glucurone; D-Glucurono-3,6-lactone; D-Glucurone;	175.024	NA	0.633333	1	map00053 Ascorbate and aldarate metabolism; map01100 Metabolic pathways	down
0.63_175.0245m/z	0.426519	0.0498079	0.105122	0.863527	3.90982	CaseC:Control	C20364	C20364	C6H8O6	M-H	39.3	1.03	-1.94013	97.925	Erythorbic acid; Isoascorbic acid;	175.024	NA	0.633333	1	NULL	down
0.63_175.0245m/z	0.426519	0.0498079	0.105122	0.863527	3.90982	CaseC:Control	C04471	C04471	C6H8O6	M-H	39.3	1.03	-1.94013	97.925	(4S,5S)-4,5-Dihydroxy-2,6-dioxohexanoate;	175.024	NA	0.633333	1	NULL	down
0.63_175.0245m/z	0.426519	0.0498079	0.105122	0.863527	3.90982	CaseC:Control	C04349	C04349	C6H8O6	M-H	39.3	1.03	-1.94013	97.925	(4S)-4,6-Dihydroxy-2,5-dioxohexanoate; 3-Deoxy-D-glycero-2,5-hexodiulosonate; 2,5-Diketo-3-deoxy-D-gluconate;	175.024	NA	0.633333	1	map00040 Pentose and glucuronate interconversions	down
0.63_175.0245m/z	0.426519	0.0498079	0.105122	0.863527	3.90982	CaseC:Control	C06430	C06430	C6H8O6	M-H	39.3	1.03	-1.94013	97.925	D-Galacturonolactone; D-gamma-Galacturonolactone;	175.024	NA	0.633333	1	NULL	down
0.63_175.0245m/z	0.426519	0.0498079	0.105122	0.863527	3.90982	CaseC:Control	C19806	C19806	C6H8O6	M-H	39.3	1.03	-1.94013	97.925	Propane-1,2,3-tricarboxylate; Tricarballylate;	175.024	NA	0.633333	1	NULL	down
0.63_175.0245m/z	0.426519	0.0498079	0.105122	0.863527	3.90982	CaseC:Control	C03289	C03289	C6H8O6	M-H	39.3	1.03	-1.94013	97.925	L-xylo-Hexulonolactone; L-xylo-Hex-2-ulono-1,4-lactone;	175.024	NA	0.633333	1	map00053 Ascorbate and aldarate metabolism; map01100 Metabolic pathways	down
0.63_175.0245m/z	0.426519	0.0498079	0.105122	0.863527	3.90982	CaseC:Control	C00072	C00072	C6H8O6	M-H	39.3	1.03	-1.94013	97.925	Ascorbate; Ascorbic acid; L-Ascorbate; L-Ascorbic acid; Vitamin C;	175.024	NA	0.633333	1	map00053 Ascorbate and aldarate metabolism; map00480 Glutathione metabolism; map01100 Metabolic pathways; map01110 Biosynthesis of secondary metabolites; map01120 Microbial metabolism in diverse environments; map02060 Phosphotransferase system (PTS); map04066 HIF-1 signaling pathway; map04977 Vitamin digestion and absorption	down
0.63_175.0245m/z	0.426519	0.0498079	0.105122	0.863527	3.90982	CaseC:Control	C03217	C03217	C6H8O6	M-H	39.3	1.03	-1.94013	97.925	2-Hydroxy-3-oxoadipate;	175.024	NA	0.633333	1	map00630 Glyoxylate and dicarboxylate metabolism	down
0.63_175.0245m/z	0.426519	0.0498079	0.105122	0.863527	3.90982	CaseC:Control	C01041	C01041	C6H8O6	M-H	39.3	1.03	-1.94013	97.925	Monodehydroascorbate; Monodehydroascorbate radical; Ascorbate radical; Semidehydroascorbic acid;	175.024	NA	0.633333	1	map00053 Ascorbate and aldarate metabolism; map01100 Metabolic pathways	down
0.63_175.0245m/z	0.426519	0.0498079	0.105122	0.863527	3.90982	CaseC:Control	C04053	C04053	C6H8O6	M-H	39.3	1.03	-1.94013	97.925	5-Dehydro-4-deoxy-D-glucuronate; 4-Deoxy-L-threo-5-hexosulose uronate;	175.024	NA	0.633333	1	map00040 Pentose and glucuronate interconversions	down
0.63_190.9723m/z	0.657529	0.00613074	0.00684146	0.534651	2.35368	CaseC:Control	NA	NULL	NA	NA	NA	NA	NA	NA	NA	NA	NA	NA	NA	NULL	down
0.63_212.9539m/z	0.69388	0.00277748	0.00150469	0.310772	2.21595	CaseC:Control	C03076	C03076	C8H7BrO2	M-H	28.2	0	-8.12954	50.1763	4-Bromophenylacetate; 4-Bromophenylacetic acid;	212.954	NA	0.633333	1	NULL	down
0.63_212.9539m/z	0.69388	0.00277748	0.00150469	0.310772	2.21595	CaseC:Control	C20341	C20341	C4H4Na2O5	M+Cl	37.9	0	-4.98567	95.4195	Disodium malate; Disodium DL-malate;	212.954	NA	0.633333	1	NULL	down
0.63_214.9520m/z	0.685081	0.00997522	0.00519604	0.534651	2.26851	CaseC:Control	NA	NULL	NA	NA	NA	NA	NA	NA	NA	NA	NA	NA	NA	NULL	down
0.63_218.0893m/z	42.9906	2.66e-05	1.08e-05	0.0125203	11.4479	CaseC:Control	C03417	C03417	C6H13N5O4	M-H	39.3	0	-0.934215	97.392	N(omega)-Nitro-L-arginine; N(G)-Nitro-L-arginine;	218.089	NA	0.633333	1	NULL	up
0.63_240.0709m/z	4.51923	0.00067	1.08e-05	0.0125203	3.6856	CaseC:Control	NA	NULL	NA	NA	NA	NA	NA	NA	NA	NA	NA	NA	NA	NULL	up
0.63_244.0692n	1.31024	8.57e-05	0.000325	0.125203	1.78867	CaseC:Control	C00299	C00299	C9H12N2O6	M-H, M+Cl	39.5	0.707	-1.29995	98.4473	Uridine;	243.062	244.069	0.633333	1	map00240 Pyrimidine metabolism; map01100 Metabolic pathways	up
0.63_244.0692n	1.31024	8.57e-05	0.000325	0.125203	1.78867	CaseC:Control	C16745	C16745	C9H12N2O6	M-H, M+Cl	39.5	0.707	-1.29995	98.4473	Spongouridine;	243.062	244.069	0.633333	1	NULL	up
0.63_244.0692n	1.31024	8.57e-05	0.000325	0.125203	1.78867	CaseC:Control	C02067	C02067	C9H12N2O6	M-H, M+Cl	51.5	60.5	-1.29995	98.4473	Pseudouridine;	243.062	244.069	0.633333	1	map00240 Pyrimidine metabolism	up
0.63_270.9138m/z	0.742036	0.00960972	0.00388621	0.468207	1.96736	CaseC:Control	NA	NULL	NA	NA	NA	NA	NA	NA	NA	NA	NA	NA	NA	NULL	down
0.63_298.0260m/z	1.78478	0.00016	7.58e-05	0.0547763	2.78787	CaseC:Control	C13144	C13144	C13H12ClN2O2	M+Cl	32.2	0	-8.06994	69.9424	Ozagrel hydrochloride;	298.026	NA	0.633333	1	NULL	up
0.63_356.0968m/z	0.484473	0.0357134	0.0114962	0.593596	2.52732	CaseC:Control	C17751	C17751	C15H19NO9	M-H	38.3	4.65	-5.2103	93.0534	cyclo-Dopa 5-O-glucoside;	356.097	NA	0.633333	1	map00965 Betalain biosynthesis	down
0.63_414.9905m/z	1.31112	0.0242202	0.0288056	0.691214	1.56631	CaseC:Control	C16618	C16618	C10H13N4O8PS	M+Cl	30.1	0	4.94468	56.0699	6-Thioxanthine 5'-monophosphate;	414.99	NA	0.633333	1	map00983 Drug metabolism - other enzymes	up
0.69_145.0137m/z	0.583951	0.00028	0.000325	0.125203	2.71425	CaseC:Control	C03716	C03716	C5H6O5	M-H	38.9	0	-3.41272	98.6218	Oxaloacetate 4-methyl ester;	145.014	NA	0.690467	1	NULL	down
0.69_145.0137m/z	0.583951	0.00028	0.000325	0.125203	2.71425	CaseC:Control	C06030	C06030	C5H6O5	M-H	38.9	0	-3.41272	98.6218	Methyloxaloacetate;	145.014	NA	0.690467	1	map00660 C5-Branched dibasic acid metabolism	down
0.69_145.0137m/z	0.583951	0.00028	0.000325	0.125203	2.71425	CaseC:Control	C06316	C06316	C5H6O5	M-H	38.9	0	-3.41272	98.6218	Dehydro-D-arabinono-1,4-lactone; (5R)-3,4-Dihydroxy-5-(hydroxymethyl)furan-2(5H)-one;	145.014	NA	0.690467	1	NULL	down
0.69_145.0137m/z	0.583951	0.00028	0.000325	0.125203	2.71425	CaseC:Control	C00026	C00026	C5H6O5	M-H	38.9	0	-3.41272	98.6218	2-Oxoglutarate; Oxoglutaric acid; 2-Ketoglutaric acid; alpha-Ketoglutaric acid;	145.014	NA	0.690467	1	map00020 Citrate cycle (TCA cycle); map00040 Pentose and glucuronate interconversions; map00053 Ascorbate and aldarate metabolism; map00220 Arginine biosynthesis; map00250 Alanine, aspartate and glutamate metabolism; map00300 Lysine biosynthesis; map00340 Histidine metabolism; map00365 Furfural degradation; map00430 Taurine and hypotaurine metabolism; map00471 D-Glutamine and D-glutamate metaboli…	down
0.69_145.0137m/z	0.583951	0.00028	0.000325	0.125203	2.71425	CaseC:Control	C05406	C05406	C5H6O5	M-H	38.9	0	-3.41272	98.6218	5-Hydroxy-2,4-dioxopentanoate;	145.014	NA	0.690467	1	NULL	down
0.69_145.0137m/z	0.583951	0.00028	0.000325	0.125203	2.71425	CaseC:Control	C08369	C08369	C6H10S2	M-H	35.7	0	-9.36406	88.9196	Diallyl disulfide;	145.014	NA	0.690467	1	NULL	down
0.69_166.9945m/z	0.557901	0.000237	0.000325	0.125203	2.86697	CaseC:Control	C07519	C07519	C3H2F6O	M-H	38.2	0	4.47001	96.4298	Desflurane;	166.994	NA	0.690467	1	NULL	down
0.69_166.9945m/z	0.557901	0.000237	0.000325	0.125203	2.86697	CaseC:Control	C11074	C11074	C5H8O2S	M+Cl	38	0	4.21696	94.7512	THTC; 2-n-Tetrahydrothiophenecarboxylic acid;	166.994	NA	0.690467	1	NULL	down
0.71_221.9025m/z	0.61147	0.0041938	0.00287947	0.426974	2.58653	CaseC:Control	NA	NULL	NA	NA	NA	NA	NA	NA	NA	NA	NA	NA	NA	NULL	down
0.73_296.8569m/z	1.22131	0.0115175	0.0114962	0.593596	1.38001	CaseC:Control	NA	NULL	NA	NA	NA	NA	NA	NA	NA	NA	NA	NA	NA	NULL	up
0.73_354.8877m/z	0.69595	0.0453162	0.0146896	0.615581	1.83832	CaseC:Control	NA	NULL	NA	NA	NA	NA	NA	NA	NA	NA	NA	NA	NA	NULL	down
0.74_274.9466m/z	0.608645	0.0415842	0.035463	0.74037	2.04607	CaseC:Control	NA	NULL	NA	NA	NA	NA	NA	NA	NA	NA	NA	NA	NA	NULL	down
0.74_283.8230m/z	1.76052	0.0243853	0.0232306	0.658543	2.65113	CaseC:Control	NA	NULL	NA	NA	NA	NA	NA	NA	NA	NA	NA	NA	NA	NULL	up
0.74_305.8004m/z	1.42306	0.0181837	0.0089307	0.586889	1.96902	CaseC:Control	NA	NULL	NA	NA	NA	NA	NA	NA	NA	NA	NA	NA	NA	NULL	up
0.74_374.8154m/z	1.32852	0.00652721	0.0114962	0.593596	1.71425	CaseC:Control	NA	NULL	NA	NA	NA	NA	NA	NA	NA	NA	NA	NA	NA	NULL	up
0.74_544.7440m/z	1.27084	0.0293887	0.0288056	0.691214	1.56212	CaseC:Control	NA	NULL	NA	NA	NA	NA	NA	NA	NA	NA	NA	NA	NA	NULL	up
0.75_216.9101m/z	1.40837	0.0142215	0.0114962	0.593596	1.83905	CaseC:Control	NA	NULL	NA	NA	NA	NA	NA	NA	NA	NA	NA	NA	NA	NULL	up
0.75_380.8241m/z	1.30877	0.00243057	0.00287947	0.426974	1.5704	CaseC:Control	NA	NULL	NA	NA	NA	NA	NA	NA	NA	NA	NA	NA	NA	NULL	up
0.75_439.7993m/z	1.27384	0.00320654	0.00388621	0.468207	1.55181	CaseC:Control	NA	NULL	NA	NA	NA	NA	NA	NA	NA	NA	NA	NA	NA	NULL	up
0.75_478.7943m/z	1.24941	0.0105829	0.00684146	0.534651	1.33688	CaseC:Control	NA	NULL	NA	NA	NA	NA	NA	NA	NA	NA	NA	NA	NA	NULL	up
0.77_270.8288m/z	1.24559	0.0129673	0.0185434	0.65388	1.37569	CaseC:Control	NA	NULL	NA	NA	NA	NA	NA	NA	NA	NA	NA	NA	NA	NULL	up
0.77_509.7263m/z	1.33809	0.0013654	0.00105003	0.276016	1.71273	CaseC:Control	NA	NULL	NA	NA	NA	NA	NA	NA	NA	NA	NA	NA	NA	NULL	up
0.77_96.9597m/z	1.20135	0.0168252	0.0185434	0.65388	1.24863	CaseC:Control	C00059	C00059	H2O4S	M-H	55.3	86.9	-4.56802	94.972	Sulfate; Sulfuric acid;	96.9597	NA	0.76835	1	map00230 Purine metabolism; map00261 Monobactam biosynthesis; map00270 Cysteine and methionine metabolism; map00920 Sulfur metabolism; map01100 Metabolic pathways; map01120 Microbial metabolism in diverse environments; map01130 Biosynthesis of antibiotics; map02010 ABC transporters	up
0.78_269.0874m/z	0.573111	0.00137041	0.00150469	0.310772	2.01591	CaseC:Control	C04583	C04583	C10H14N4O5	M-H	36.7	1.68	-6.51872	89.1219	6-Hydroxyl-1,6-dihydropurine ribonucleoside; (6R)-1,6-Dihydroinosine;	269.087	NA	0.782633	1	NULL	down
0.78_272.8289m/z	1.27393	0.0327764	0.0432571	0.762669	1.26636	CaseC:Control	NA	NULL	NA	NA	NA	NA	NA	NA	NA	NA	NA	NA	NA	NULL	up
0.78_359.8533m/z	1.33126	0.000307	7.58e-05	0.0547763	1.93318	CaseC:Control	NA	NULL	NA	NA	NA	NA	NA	NA	NA	NA	NA	NA	NA	NULL	up
0.78_389.7717m/z	1.49252	0.00197571	0.00287947	0.426974	1.98225	CaseC:Control	NA	NULL	NA	NA	NA	NA	NA	NA	NA	NA	NA	NA	NA	NULL	up
0.78_79.9567m/z	1.21968	0.0112365	0.0114962	0.593596	1.36056	CaseC:Control	C11481	C11481	HO3S-	M-H	37	0	-8.79246	94.5003	HSO3-; Hydrogen sulfite; Bisulfite;	79.9567	NA	0.782633	1	map00270 Cysteine and methionine metabolism	up
0.78_96.9851m/z	2.20777	0.0227826	0.0146896	0.615581	2.75026	CaseC:Control	NA	NULL	NA	NA	NA	NA	NA	NA	NA	NA	NA	NA	NA	NULL	up
0.84_455.9931m/z	0.634064	0.019626	0.00684146	0.534651	2.20788	CaseC:Control	NA	NULL	NA	NA	NA	NA	NA	NA	NA	NA	NA	NA	NA	NULL	down
0.88_295.8917m/z	0.767878	0.0499745	0.0432571	0.762669	1.40653	CaseC:Control	NA	NULL	NA	NA	NA	NA	NA	NA	NA	NA	NA	NA	NA	NULL	down
0.90_271.8778m/z	0.620636	0.00926971	0.00208924	0.389745	2.40359	CaseC:Control	NA	NULL	NA	NA	NA	NA	NA	NA	NA	NA	NA	NA	NA	NULL	down
0.98_129.0190m/z	0.629707	0.0445151	0.0288056	0.691214	2.07496	CaseC:Control	C02800	C02800	C5H6O4	M-H	38.4	0	-2.83679	95.2935	4,5-Dioxopentanoate; 4-Oxoglutarate semialdehyde;	129.019	NA	0.98265	1	map00860 Porphyrin and chlorophyll metabolism	down
0.98_129.0190m/z	0.629707	0.0445151	0.0288056	0.691214	2.07496	CaseC:Control	C00490	C00490	C5H6O4	M-H	38.4	0	-2.83679	95.2935	Itaconate; Itaconic acid; Methylenesuccinic acid;	129.019	NA	0.98265	1	map00660 C5-Branched dibasic acid metabolism	down
0.98_129.0190m/z	0.629707	0.0445151	0.0288056	0.691214	2.07496	CaseC:Control	C01732	C01732	C5H6O4	M-H	38.4	0	-2.83679	95.2935	Mesaconate; 2-Methylfumarate; Mesaconic acid; Methylfumaric acid; (E)-2-Methyl-2-butenedioic acid;	129.019	NA	0.98265	1	map00630 Glyoxylate and dicarboxylate metabolism; map00660 C5-Branched dibasic acid metabolism; map01100 Metabolic pathways; map01200 Carbon metabolism	down
0.98_129.0190m/z	0.629707	0.0445151	0.0288056	0.691214	2.07496	CaseC:Control	C02132	C02132	C5H6O4	M-H	38.4	0	-2.83679	95.2935	Acetylpyruvate; Acetylpyruvic acid; 2,4-Dioxopentanoate;	129.019	NA	0.98265	1	NULL	down
0.98_129.0190m/z	0.629707	0.0445151	0.0288056	0.691214	2.07496	CaseC:Control	C02226	C02226	C5H6O4	M-H	38.4	0	-2.83679	95.2935	2-Methylmaleate; Citraconate; Citraconic acid; Methylmaleic acid;	129.019	NA	0.98265	1	map00290 Valine, leucine and isoleucine biosynthesis; map00660 C5-Branched dibasic acid metabolism; map01100 Metabolic pathways; map01210 2-Oxocarboxylic acid metabolism	down
0.98_129.0190m/z	0.629707	0.0445151	0.0288056	0.691214	2.07496	CaseC:Control	C02214	C02214	C5H6O4	M-H	38.4	0	-2.83679	95.2935	(E)-Glutaconate; trans-Glutaconate; trans-Glutaconic acid; Glutaconic acid;	129.019	NA	0.98265	1	NULL	down
0.98_129.0190m/z	0.629707	0.0445151	0.0288056	0.691214	2.07496	CaseC:Control	C00433	C00433	C5H6O4	M-H	38.4	0	-2.83679	95.2935	2,5-Dioxopentanoate; 2-Oxoglutarate semialdehyde;	129.019	NA	0.98265	1	map00040 Pentose and glucuronate interconversions; map00053 Ascorbate and aldarate metabolism; map00330 Arginine and proline metabolism; map01100 Metabolic pathways	down
1.00_242.8498m/z	1.24096	0.0121493	0.0114962	0.593596	1.3932	CaseC:Control	NA	NULL	NA	NA	NA	NA	NA	NA	NA	NA	NA	NA	NA	NULL	up
10.92_699.5156m/z	0.306569	0.0421971	0.123005	0.885854	3.06873	CaseC:Control	NA	NULL	NA	NA	NA	NA	NA	NA	NA	NA	NA	NA	NA	NULL	down
11.15_708.4609m/z	0.807823	0.00346152	0.00388621	0.468207	1.42429	CaseC:Control	NA	NULL	NA	NA	NA	NA	NA	NA	NA	NA	NA	NA	NA	NULL	down
11.15_802.7879m/z	0.73864	0.0151595	0.0114962	0.593596	1.81582	CaseC:Control	NA	NULL	NA	NA	NA	NA	NA	NA	NA	NA	NA	NA	NA	NULL	down
11.36_495.4753m/z	0.778781	0.0226279	0.0114962	0.593596	1.62043	CaseC:Control	C16793	C16793	C32H64O3	M-H	35.7	0	-5.8966	85.3148	Corynomycolic acid;	495.475	NA	11.3614	1	NULL	down
11.43_277.1803m/z	0.827251	0.0219745	0.0432571	0.762669	1.42791	CaseC:Control	C16792	C16792	C17H26O3	M-H	38.4	4.17	-2.11187	90.4691	Panaxytriol;	277.18	NA	11.4329	1	NULL	down
11.43_277.1803m/z	0.827251	0.0219745	0.0432571	0.762669	1.42791	CaseC:Control	C10482	C10482	C17H26O3	M-H	38.3	3.71	-2.11187	90.4691	6-Paradol; 3-Decanone, 1-(4-hydroxy-3-methoxyphenyl)-;	277.18	NA	11.4329	1	NULL	down
11.96_730.8085m/z	1.37361	0.00197879	0.0089307	0.586889	2.00798	CaseC:Control	NA	NULL	NA	NA	NA	NA	NA	NA	NA	NA	NA	NA	NA	NULL	up
3.29_288.9887m/z	1.63063	0.031425	0.0524259	0.777382	2.74806	CaseC:Control	C17697	C17697	C7H11O8P	M+Cl	38.6	0	0.751262	94.0076	Valienone 7-phosphate;	288.989	NA	3.285	1	map00525 Acarbose and validamycin biosynthesis; map01130 Biosynthesis of antibiotics	up
3.29_288.9887m/z	1.63063	0.031425	0.0524259	0.777382	2.74806	CaseC:Control	C03175	C03175	C7H11O8P	M+Cl	38.6	0	0.751262	94.0076	Shikimate 3-phosphate; Shikimate 5-phosphate;	288.989	NA	3.285	1	map00400 Phenylalanine, tyrosine and tryptophan biosynthesis; map01100 Metabolic pathways; map01110 Biosynthesis of secondary metabolites; map01130 Biosynthesis of antibiotics; map01230 Biosynthesis of amino acids	up
3.41_179.0346m/z	0.487643	0.0216169	0.035463	0.74037	2.64054	CaseC:Control	C01179	C01179	C9H8O4	M-H	38.4	0	-1.96512	94.5204	3-(4-Hydroxyphenyl)pyruvate; 4-Hydroxyphenylpyruvate; p-Hydroxyphenylpyruvic acid;	179.035	NA	3.41358	1	map00130 Ubiquinone and other terpenoid-quinone biosynthesis; map00261 Monobactam biosynthesis; map00350 Tyrosine metabolism; map00400 Phenylalanine, tyrosine and tryptophan biosynthesis; map00401 Novobiocin biosynthesis; map00680 Methane metabolism; map00950 Isoquinoline alkaloid biosynthesis; map01055 Biosynthesis of vancomycin group antibiotics; map01060 Biosynthesis of plant secondary metabol…	down
3.41_179.0346m/z	0.487643	0.0216169	0.035463	0.74037	2.64054	CaseC:Control	C01481	C01481	C9H8O4	M-H	38.4	0	-1.96512	94.5204	Caffeate; Caffeic acid; 3,4-Dihydroxycinnamic acid;	179.035	NA	3.41358	1	NULL	down
3.41_179.0346m/z	0.487643	0.0216169	0.035463	0.74037	2.64054	CaseC:Control	C01197	C01197	C9H8O4	M-H	38.4	0	-1.96512	94.5204	Caffeate; Caffeic acid; 3,4-Dihydroxy-trans-cinnamate; trans-Caffeate; (2E)-3-(3,4-Dihydroxyphenyl)prop-2-enoate;	179.035	NA	3.41358	1	map00940 Phenylpropanoid biosynthesis; map01061 Biosynthesis of phenylpropanoids; map01100 Metabolic pathways; map01110 Biosynthesis of secondary metabolites; map01220 Degradation of aromatic compounds	down
3.41_179.0346m/z	0.487643	0.0216169	0.035463	0.74037	2.64054	CaseC:Control	C01405	C01405	C9H8O4	M-H	38.4	0	-1.96512	94.5204	Aspirin; Acetylsalicylic acid; 2-Acetoxybenzenecarboxylic acid; Acetylsalicylate;	179.035	NA	3.41358	1	map04976 Bile secretion	down
3.41_179.0346m/z	0.487643	0.0216169	0.035463	0.74037	2.64054	CaseC:Control	C05350	C05350	C9H8O4	M-H	38.4	0	-1.96512	94.5204	2-Hydroxy-3-(4-hydroxyphenyl)propenoate; 4-Hydroxy-enol-phenylpyruvate;	179.035	NA	3.41358	1	map00350 Tyrosine metabolism	down
3.41_179.0346m/z	0.487643	0.0216169	0.035463	0.74037	2.64054	CaseC:Control	C12623	C12623	C9H8O4	M-H	38.4	0	-1.96512	94.5204	trans-2,3-Dihydroxycinnamate; (2E)-3-(2,3-Dihydroxyphenyl)prop-2-enoate;	179.035	NA	3.41358	1	map00360 Phenylalanine metabolism; map01120 Microbial metabolism in diverse environments; map01220 Degradation of aromatic compounds	down
3.66_272.0213n	0.649903	0.0475876	0.0288056	0.691214	1.91626	CaseC:Control	NA	NULL	NA	NA	NA	NA	NA	NA	NA	NA	NA	NA	NA	NULL	down
3.78_536.9872m/z	1.32696	0.0495539	0.035463	0.74037	1.8375	CaseC:Control	NA	NULL	NA	NA	NA	NA	NA	NA	NA	NA	NA	NA	NA	NULL	up
3.83_403.1833m/z	1.83598	0.000549	1.08e-05	0.0125203	2.7293	CaseC:Control	NA	NULL	NA	NA	NA	NA	NA	NA	NA	NA	NA	NA	NA	NULL	up
3.97_190.0536m/z	0.585865	0.0482914	0.0630128	0.811589	2.59416	CaseC:Control	C02712	C02712	C7H13NO3S	M-H	37.5	0	-3.8541	92.0357	N-Acetylmethionine; N-Acetyl-L-methionine;	190.054	NA	3.96935	1	NULL	down
4.03_242.9966m/z	0.445063	0.0277069	0.0432571	0.762669	3.6602	CaseC:Control	NA	NULL	NA	NA	NA	NA	NA	NA	NA	NA	NA	NA	NA	NULL	down
4.04_258.9916m/z	0.413576	0.0300245	0.0524259	0.777382	3.05789	CaseC:Control	C16455	C16455	Ra	M+Cl	18.1	0	8.67806	0	Radium-224;	258.992	NA	4.04078	1	NULL	down
4.06_960.9684m/z	1.61037	0.0386701	0.0288056	0.691214	2.82204	CaseC:Control	NA	NULL	NA	NA	NA	NA	NA	NA	NA	NA	NA	NA	NA	NULL	up
4.06_961.4696m/z	1.52035	0.0420877	0.0432571	0.762669	2.249	CaseC:Control	NA	NULL	NA	NA	NA	NA	NA	NA	NA	NA	NA	NA	NA	NULL	up
4.19_158.0819m/z	1.72434	0.0333687	0.035463	0.74037	1.83372	CaseC:Control	C03087	C03087	C7H13NO3	M-H	38.1	0	-2.37124	93.2015	5-Acetamidopentanoate;	158.082	NA	4.19008	1	map00310 Lysine degradation	up
4.19_158.0819m/z	1.72434	0.0333687	0.035463	0.74037	1.83372	CaseC:Control	C10151	C10151	C7H13NO3	M-H	38.1	0	-2.37124	93.2015	3-Hydroxystachydrine;	158.082	NA	4.19008	1	NULL	up
4.19_158.0819m/z	1.72434	0.0333687	0.035463	0.74037	1.83372	CaseC:Control	C10850	C10850	C7H13NO3	M-H	38.1	0	-2.37124	93.2015	Calystegin A3; Calystegine A3;	158.082	NA	4.19008	1	map00960 Tropane, piperidine and pyridine alkaloid biosynthesis	up
4.19_158.0819m/z	1.72434	0.0333687	0.035463	0.74037	1.83372	CaseC:Control	C08269	C08269	C7H13NO3	M-H	38.1	0	-2.37124	93.2015	(-)-Betonicine; Betonicine;	158.082	NA	4.19008	1	NULL	up
4.22_293.1142m/z	0.741192	0.0271171	0.0288056	0.691214	1.68165	CaseC:Control	C11045	C11045	C14H18N2O5	M-H	37.9	0	-0.278172	89.7402	Aspartame;	293.114	NA	4.21867	1	map04742 Taste transduction	down
4.26_348.1086m/z	0.305515	0.00937938	0.00388621	0.468207	5.09438	CaseC:Control	C07622	C07622	C16H14F3N5O	M-H	38.2	0	2.458	93.8545	Voriconazole; Vfend;	348.109	NA	4.26152	1	NULL	down
4.43_950.4701m/z	0.679299	0.0430212	0.0232306	0.658543	2.18043	CaseC:Control	NA	NULL	NA	NA	NA	NA	NA	NA	NA	NA	NA	NA	NA	NULL	down
4.50_187.0068m/z	2.43592	0.00931399	0.00519604	0.534651	3.75324	CaseC:Control	C06678	C06678	C7H8O4S	M-H	39.7	0	-1.15565	99.7973	4-Sulfobenzyl alcohol; 4-(Hydroxymethyl)benzenesulfonate;	187.007	NA	4.49655	1	map00623 Toluene degradation; map01120 Microbial metabolism in diverse environments; map01220 Degradation of aromatic compounds	up
4.50_271.9845m/z	2.28347	0.0118111	0.00684146	0.534651	3.8919	CaseC:Control	NA	NULL	NA	NA	NA	NA	NA	NA	NA	NA	NA	NA	NA	NULL	up
4.55_202.0507m/z	0.665854	0.0459433	0.0432571	0.762669	1.61788	CaseC:Control	C00331	C00331	C11H9NO3	M-H	38.1	0	-1.46398	92.4831	Indolepyruvate; Indolepyruvic acid; (Indol-3-yl)pyruvate; Indole-3-pyruvate; 3-(Indol-3-yl)pyruvate;	202.051	NA	4.55368	1	map00380 Tryptophan metabolism; map01100 Metabolic pathways	down
4.55_202.0507m/z	0.665854	0.0459433	0.0432571	0.762669	1.61788	CaseC:Control	C10127	C10127	C11H9NO3	M-H	38.1	0	-1.46398	92.4831	Anibine;	202.051	NA	4.55368	1	NULL	down
4.55_202.0507m/z	0.665854	0.0459433	0.0432571	0.762669	1.61788	CaseC:Control	C14148	C14148	C6H9N5O	M+Cl	38.5	0	3.34098	96.6665	N-Cyclopropylammeline; 2-Hydroxy-4-amino-6-(cyclopropylamino)-1,3,5-triazine;	202.051	NA	4.55368	1	map00791 Atrazine degradation; map01120 Microbial metabolism in diverse environments	down
4.64_710.8160m/z	1.34833	0.0156558	0.0114962	0.593596	1.67387	CaseC:Control	NA	NULL	NA	NA	NA	NA	NA	NA	NA	NA	NA	NA	NA	NULL	up
4.64_711.3177m/z	1.37235	0.0162952	0.0232306	0.658543	1.73151	CaseC:Control	C19986	C19986	C35H52O15	M-H	33.8	5.37	-7.91536	72.5908	Convalloside;	711.318	NA	4.63942	1	NULL	up
4.64_721.8057m/z	1.38717	0.0315365	0.0146896	0.615581	1.89134	CaseC:Control	NA	NULL	NA	NA	NA	NA	NA	NA	NA	NA	NA	NA	NA	NULL	up
4.64_737.7729m/z	1.23101	0.0373177	0.0232306	0.658543	1.24338	CaseC:Control	NA	NULL	NA	NA	NA	NA	NA	NA	NA	NA	NA	NA	NA	NULL	up
4.68_283.0822m/z	2.24157	0.0248581	0.00684146	0.534651	4.07597	CaseC:Control	C07423	C07423	C11H17N2NaO3	M+Cl	39	0	-3.52871	99.1829	Pentobarbital sodium;	283.082	NA	4.68227	1	NULL	up
4.68_810.8542n	1.40019	0.0388303	0.105122	0.863527	1.74708	CaseC:Control	NA	NULL	NA	NA	NA	NA	NA	NA	NA	NA	NA	NA	NA	NULL	up
4.68_818.8530m/z	1.41454	0.0220401	0.0432571	0.762669	1.86189	CaseC:Control	NA	NULL	NA	NA	NA	NA	NA	NA	NA	NA	NA	NA	NA	NULL	up
4.68_818.9250m/z	1.95546	0.0105609	0.0146896	0.615581	3.0467	CaseC:Control	NA	NULL	NA	NA	NA	NA	NA	NA	NA	NA	NA	NA	NA	NULL	up
4.68_819.3548m/z	1.40957	0.0234715	0.0432571	0.762669	1.84019	CaseC:Control	NA	NULL	NA	NA	NA	NA	NA	NA	NA	NA	NA	NA	NA	NULL	up
4.68_829.8431m/z	1.45685	0.018685	0.0288056	0.691214	1.98953	CaseC:Control	NA	NULL	NA	NA	NA	NA	NA	NA	NA	NA	NA	NA	NA	NULL	up
4.68_830.3447m/z	1.44041	0.0158972	0.0146896	0.615581	1.9253	CaseC:Control	C10579	C10579	C45H53NO14	M-H	33.8	14	6.42127	62.3644	Cephalomannine; Taxol B;	830.345	NA	4.68227	1	NULL	up
4.68_845.3083m/z	1.46537	0.0155008	0.0432571	0.762669	2.08049	CaseC:Control	NA	NULL	NA	NA	NA	NA	NA	NA	NA	NA	NA	NA	NA	NULL	up
4.68_856.2987m/z	1.77516	0.0110414	0.00684146	0.534651	2.28126	CaseC:Control	NA	NULL	NA	NA	NA	NA	NA	NA	NA	NA	NA	NA	NA	NULL	up
4.68_868.3108m/z	2.147	0.0303609	0.0288056	0.691214	2.9569	CaseC:Control	NA	NULL	NA	NA	NA	NA	NA	NA	NA	NA	NA	NA	NA	NULL	up
4.68_869.8214n	1.55123	0.0149749	0.0288056	0.691214	2.32852	CaseC:Control	NA	NULL	NA	NA	NA	NA	NA	NA	NA	NA	NA	NA	NA	NULL	up
4.68_870.3230n	1.59607	0.0121223	0.035463	0.74037	2.31674	CaseC:Control	NA	NULL	NA	NA	NA	NA	NA	NA	NA	NA	NA	NA	NA	NULL	up
4.68_872.2660m/z	1.67386	0.0471121	0.0288056	0.691214	2.65672	CaseC:Control	NA	NULL	NA	NA	NA	NA	NA	NA	NA	NA	NA	NA	NA	NULL	up
4.68_880.3042m/z	1.58805	0.039647	0.0630128	0.811589	2.19152	CaseC:Control	NA	NULL	NA	NA	NA	NA	NA	NA	NA	NA	NA	NA	NA	NULL	up
4.73_763.3599m/z	1.71194	0.0288145	0.0524259	0.777382	2.19161	CaseC:Control	NA	NULL	NA	NA	NA	NA	NA	NA	NA	NA	NA	NA	NA	NULL	up
4.74_768.3295m/z	1.37043	0.027259	0.0232306	0.658543	1.70121	CaseC:Control	NA	NULL	NA	NA	NA	NA	NA	NA	NA	NA	NA	NA	NA	NULL	up
4.74_768.8311m/z	1.37878	0.0135165	0.0089307	0.586889	1.78485	CaseC:Control	NA	NULL	NA	NA	NA	NA	NA	NA	NA	NA	NA	NA	NA	NULL	up
4.74_818.7775m/z	1.51154	0.00413886	0.00519604	0.534651	1.87066	CaseC:Control	NA	NULL	NA	NA	NA	NA	NA	NA	NA	NA	NA	NA	NA	NULL	up
4.75_760.3285n	1.54413	0.0252017	0.0232306	0.658543	1.84177	CaseC:Control	NA	NULL	NA	NA	NA	NA	NA	NA	NA	NA	NA	NA	NA	NULL	up
4.75_779.3194m/z	1.62528	0.0210512	0.0288056	0.691214	1.79634	CaseC:Control	NA	NULL	NA	NA	NA	NA	NA	NA	NA	NA	NA	NA	NA	NULL	up
4.75_794.7846m/z	1.55375	0.00898125	0.0114962	0.593596	2.15748	CaseC:Control	NA	NULL	NA	NA	NA	NA	NA	NA	NA	NA	NA	NA	NA	NULL	up
4.85_333.0072m/z	0.299112	0.00421018	0.0146896	0.615581	4.8218	CaseC:Control	NA	NULL	NA	NA	NA	NA	NA	NA	NA	NA	NA	NA	NA	NULL	down
4.86_341.0635m/z	2.07024	0.0170728	0.0089307	0.586889	3.29327	CaseC:Control	NA	NULL	NA	NA	NA	NA	NA	NA	NA	NA	NA	NA	NA	NULL	up
5.13_349.0022m/z	0.374914	0.0379743	0.105122	0.863527	3.71802	CaseC:Control	NA	NULL	NA	NA	NA	NA	NA	NA	NA	NA	NA	NA	NA	NULL	down
5.87_325.1294m/z	3.66833	0.00574858	0.00519604	0.534651	2.89686	CaseC:Control	C15451	C15451	C16H22O7	M-H	37.1	0	0.437789	86.1493	Hinokitiol glucoside; beta-Thujaplicin 2-O-beta-D-glucoside;	325.129	NA	5.86523	1	NULL	up
6.11_207.0696m/z	5.39148	0.000114	0.00013	0.0751218	4.46649	CaseC:Control	C11690	C11690	C11H13ClN2	M-H	33.6	0	0.513884	68.5229	Epibatidine;	207.07	NA	6.10812	1	NULL	up
6.11_207.0696m/z	5.39148	0.000114	0.00013	0.0751218	4.46649	CaseC:Control	C10656	C10656	C11H12N2	M+Cl	37.9	0	0.621309	90.4504	Deoxypeganine; 3-Deoxyvasicine;	207.07	NA	6.10812	1	NULL	up
6.46_278.0676m/z	0.550028	0.0471343	0.0432571	0.762669	1.69633	CaseC:Control	NA	NULL	NA	NA	NA	NA	NA	NA	NA	NA	NA	NA	NA	NULL	down
6.49_345.2282m/z	2.37355	0.0392527	0.0524259	0.777382	2.70301	CaseC:Control	NA	NULL	NA	NA	NA	NA	NA	NA	NA	NA	NA	NA	NA	NULL	up
7.03_227.1286m/z	1.38646	0.00138876	0.00287947	0.426974	1.2302	CaseC:Control	C16308	C16308	C12H20O4	M-H	38.8	0	-1.40051	95.8259	Traumatic acid; (2E)-Dodecenedioic acid; Dodec-2-enedioic acid;	227.129	NA	7.02748	1	map00592 alpha-Linolenic acid metabolism; map01110 Biosynthesis of secondary metabolites	up
7.03_473.3263m/z	3.02346	0.00137725	0.00150469	0.310772	2.59059	CaseC:Control	NA	NULL	NA	NA	NA	NA	NA	NA	NA	NA	NA	NA	NA	NULL	up
7.16_331.1913m/z	0.396506	0.0193511	0.035463	0.74037	3.29461	CaseC:Control	C18175	C18175	C20H28O4	M-H	38.5	0	-0.416182	92.9661	5,6-Epoxy-18R-HEPE; 5,6-Epoxy,18R-hydroxy-7E,9E,11Z,14Z,16E-eicosapentaenoic acid;	331.191	NA	7.15607	1	NULL	down
7.16_331.1913m/z	0.396506	0.0193511	0.035463	0.74037	3.29461	CaseC:Control	C09067	C09067	C20H28O4	M-H	38.5	0	-0.416182	92.9661	Callicarpone;	331.191	NA	7.15607	1	NULL	down
7.16_331.1913m/z	0.396506	0.0193511	0.035463	0.74037	3.29461	CaseC:Control	C09177	C09177	C20H28O4	M-H	38.5	0	-0.416182	92.9661	Premarrubiin;	331.191	NA	7.15607	1	NULL	down
7.16_331.1913m/z	0.396506	0.0193511	0.035463	0.74037	3.29461	CaseC:Control	C11905	C11905	C20H28O4	M-H	38.5	0	-0.416182	92.9661	Gibberellin A53 aldehyde;	331.191	NA	7.15607	1	map00904 Diterpenoid biosynthesis	down
7.16_331.1913m/z	0.396506	0.0193511	0.035463	0.74037	3.29461	CaseC:Control	C11857	C11857	C20H28O4	M-H	38.5	0	-0.416182	92.9661	Gibberellin A12;	331.191	NA	7.15607	1	map00904 Diterpenoid biosynthesis; map01100 Metabolic pathways; map01110 Biosynthesis of secondary metabolites	down
7.16_331.1913m/z	0.396506	0.0193511	0.035463	0.74037	3.29461	CaseC:Control	C15068	C15068	C20H28O4	M-H	38.5	0	-0.416182	92.9661	17beta-Hydroxy-4-oxa-5alpha-androst-1-en-3-one acetate;	331.191	NA	7.15607	1	NULL	down
7.16_331.1913m/z	0.396506	0.0193511	0.035463	0.74037	3.29461	CaseC:Control	C09128	C09128	C20H28O4	M-H	38.5	0	-0.416182	92.9661	Marrubiin;	331.191	NA	7.15607	1	NULL	down
7.16_331.1913m/z	0.396506	0.0193511	0.035463	0.74037	3.29461	CaseC:Control	C15459	C15459	C20H28O4	M-H	38.5	0	-0.416182	92.9661	13-Hydroxy-2-(hydroxymethylene)-3-oxo-13,17-seco-5alpha-androstan-17-oic acid, delta-lactone;	331.191	NA	7.15607	1	NULL	down
7.16_331.1913m/z	0.396506	0.0193511	0.035463	0.74037	3.29461	CaseC:Control	C11853	C11853	C20H28O4	M-H	38.5	0	-0.416182	92.9661	Gibberellin A14 aldehyde;	331.191	NA	7.15607	1	map00904 Diterpenoid biosynthesis	down
7.16_331.1913m/z	0.396506	0.0193511	0.035463	0.74037	3.29461	CaseC:Control	C09081	C09081	C20H28O4	M-H	38.5	0	-0.416182	92.9661	7beta,12alpha-Dihydroxykaurenolide;	331.191	NA	7.15607	1	NULL	down
7.20_210.0776m/z	0.523653	0.0335482	0.0288056	0.691214	2.62354	CaseC:Control	C07194	C07194	C10H13NO4	M-H	37.4	0	1.86534	89.4335	Methyldopa anhydrous; Methyldopa;	210.078	NA	7.20248	1	NULL	down
7.20_210.0776m/z	0.523653	0.0335482	0.0288056	0.691214	2.62354	CaseC:Control	C09946	C09946	C10H13NO4	M-H	37.4	0	1.86534	89.4335	Enicoflavine; 3-(Aminomethylene)-alpha-ethenyltetrahydro-4-hydroxy-2-oxo-2H-pyran-4-acetaldehyde;	210.078	NA	7.20248	1	NULL	down
7.20_210.0776m/z	0.523653	0.0335482	0.0288056	0.691214	2.62354	CaseC:Control	C20801	C20801	C10H13NO4	M-H	37.4	0	1.86534	89.4335	3-Hydroxy-5-methyl-L-tyrosine;	210.078	NA	7.20248	1	NULL	down
7.23_330.1381m/z	2.0764	0.00299629	0.00388621	0.468207	3.07832	CaseC:Control	NA	NULL	NA	NA	NA	NA	NA	NA	NA	NA	NA	NA	NA	NULL	up
7.25_213.1494m/z	1.56176	0.0350694	0.0892096	0.859831	4.46736	CaseC:Control	C02367	C02367	C12H22O3	M-H	38.5	0	-0.807699	93.3292	3-Oxododecanoic acid; 3-Oxododecanoate;	213.149	NA	7.24822	1	NULL	up
7.43_313.0784m/z	0.648846	0.0305818	0.0432571	0.762669	1.47551	CaseC:Control	C04457	C04457	H2O.[C9H17N2O7P]n	M-H	18.4	0	-6.97782	NA	D-Alanyl-alanyl-poly(glycerolphosphate);	313.078	NA	7.43395	1	map00473 D-Alanine metabolism	down
7.43_313.0784m/z	0.648846	0.0305818	0.0432571	0.762669	1.47551	CaseC:Control	C19500	C19500	C22H14	M+Cl	38.1	0	-1.86123	92.5123	Picene; Benzo[a]chrysene;	313.078	NA	7.43395	1	NULL	down
7.43_313.0784m/z	0.648846	0.0305818	0.0432571	0.762669	1.47551	CaseC:Control	C19340	C19340	C22H14	M+Cl	38.1	0	-1.86123	92.5123	Benzo[g]chrysene;	313.078	NA	7.43395	1	NULL	down
7.43_313.0784m/z	0.648846	0.0305818	0.0432571	0.762669	1.47551	CaseC:Control	C19339	C19339	C22H14	M+Cl	38.1	0	-1.86123	92.5123	Benzo[b]chrysene; 1,2:6,7-Dibenzophenanthrene;	313.078	NA	7.43395	1	NULL	down
7.43_313.0784m/z	0.648846	0.0305818	0.0432571	0.762669	1.47551	CaseC:Control	C19389	C19389	C22H14	M+Cl	38.1	0	-1.86123	92.5123	Dibenz[a,j]anthracene; Dibenzo-1,2,7,8-anthracene;	313.078	NA	7.43395	1	NULL	down
7.43_313.0784m/z	0.648846	0.0305818	0.0432571	0.762669	1.47551	CaseC:Control	C19388	C19388	C22H14	M+Cl	38.1	0	-1.86123	92.5123	Dibenz[a,c]anthracene; Benzo[b]triphenylene; Benzotriphenylene;	313.078	NA	7.43395	1	NULL	down
7.43_313.0784m/z	0.648846	0.0305818	0.0432571	0.762669	1.47551	CaseC:Control	C14325	C14325	C22H14	M+Cl	38.1	0	-1.86123	92.5123	Dibenz[a,h]anthracene; 1,2:5,6-Dibenzanthracene;	313.078	NA	7.43395	1	NULL	down
7.48_437.2905m/z	2.76318	0.0125485	0.0114962	0.593596	4.25748	CaseC:Control	NA	NULL	NA	NA	NA	NA	NA	NA	NA	NA	NA	NA	NA	NULL	up
7.48_459.2713m/z	2.68583	0.0372362	0.035463	0.74037	3.51748	CaseC:Control	C13422	C13422	C27H40O6	M-H	35.2	0	-8.5104	85.3821	Hydrocortisone caproate; [2-(11,17-Dihydroxy-10,13-dimethyl-3-oxo-1,2,6,7,8,9,10,11,12,13,14,15,16,17-tetradecahydrocyclopenta[a]phenanthren-17-yl)-2-oxo-ethyl]hexanoate;	459.271	NA	7.4768	1	NULL	up
7.51_447.1342m/z	2.08209	0.0278877	0.0432571	0.762669	2.66705	CaseC:Control	NA	NULL	NA	NA	NA	NA	NA	NA	NA	NA	NA	NA	NA	NULL	up
7.58_457.3316m/z	3.52587	0.0180917	0.0232306	0.658543	4.12798	CaseC:Control	C16894	C16894	C29H46N2	M+Cl	35	0	-9.13199	85.0005	Plakinamine A;	457.332	NA	7.58325	1	NULL	up
7.61_307.1911m/z	1.60147	0.0185533	0.0630128	0.811589	2.62349	CaseC:Control	C10373	C10373	C18H28O4	M-H	37.1	0	-1.2788	87.2812	5-O-Methylembelin;	307.191	NA	7.61182	1	NULL	up
7.61_307.1911m/z	1.60147	0.0185533	0.0630128	0.811589	2.62349	CaseC:Control	C15818	C15818	C18H28O4	M-H	37.1	0	-1.2788	87.2812	Soraphen O;	307.191	NA	7.61182	1	NULL	up
7.65_549.0126m/z	1.55443	0.025617	0.00519604	0.534651	1.72409	CaseC:Control	C21352	C21352	C15H20N2O14P2	M+Cl	37.3	0	8.12617	95.3049	NA	549.013	NA	7.65468	1	NULL	up
7.75_361.2383m/z	1.67939	0.00259882	0.000487	0.176067	2.29974	CaseC:Control	C14575	C14575	C22H34O4	M-H	39	9.11	-0.285761	86.089	Di-n-heptyl phthalate;	361.238	NA	7.75468	1	NULL	up
7.75_361.2383m/z	1.67939	0.00259882	0.000487	0.176067	2.29974	CaseC:Control	C20151	C20151	C22H34O4	M-H	41.1	19.9	-0.285761	86.089	10beta,14beta-Dihydroxytaxa-4(20),11-dien-5alpha-yl acetate; 5alpha-Acetoxy-10beta,14beta-dihydroxytaxadiene;	361.238	NA	7.75468	1	map00904 Diterpenoid biosynthesis	up
7.80_215.1649m/z	0.668711	0.0496116	0.0524259	0.777382	1.84523	CaseC:Control	C21080	C21080	C12H24O3	M-H	37.3	0	-1.52181	88.51	7-Hydroxydodecanoate;	215.165	NA	7.79755	1	NULL	down
7.80_215.1649m/z	0.668711	0.0496116	0.0524259	0.777382	1.84523	CaseC:Control	C08317	C08317	C12H24O3	M-H	37.3	0	-1.52181	88.51	12-Hydroxydodecanoic acid; omega-Hydroxydodecanoic acid;	215.165	NA	7.79755	1	NULL	down
7.80_359.1902m/z	1.41511	0.00600384	0.0185434	0.65388	1.16788	CaseC:Control	NA	NULL	NA	NA	NA	NA	NA	NA	NA	NA	NA	NA	NA	NULL	up
7.95_299.2018m/z	1.42279	0.0312107	0.0524259	0.777382	1.66111	CaseC:Control	C18196	C18196	C20H28O2	M-H	37.6	0	0.336347	88.3188	(3R)-all-trans-3-Hydroxyretinal;	299.202	NA	7.94685	1	map04745 Phototransduction - fly	up
7.95_299.2018m/z	1.42279	0.0312107	0.0524259	0.777382	1.66111	CaseC:Control	C20428	C20428	C20H28O2	M-H	37.6	0	0.336347	88.3188	(3S)-11-cis-3-Hydroxyretinal;	299.202	NA	7.94685	1	map04745 Phototransduction - fly	up
7.95_299.2018m/z	1.42279	0.0312107	0.0524259	0.777382	1.66111	CaseC:Control	C20429	C20429	C20H28O2	M-H	37.6	0	0.336347	88.3188	(3S)-all-trans-3-Hydroxyretinal;	299.202	NA	7.94685	1	map04745 Phototransduction - fly	up
7.95_299.2018m/z	1.42279	0.0312107	0.0524259	0.777382	1.66111	CaseC:Control	C18195	C18195	C20H28O2	M-H	37.6	0	0.336347	88.3188	(3R)-11-cis-3-Hydroxyretinal;	299.202	NA	7.94685	1	map04745 Phototransduction - fly	up
7.95_299.2018m/z	1.42279	0.0312107	0.0524259	0.777382	1.66111	CaseC:Control	C12078	C12078	C20H28O2	M-H	37.6	0	0.336347	88.3188	Dehydroabietic acid; (-)-Dehydroabietic acid; 13-Isopropylpodocarpa-8,11,13-trien-15-oic acid; Abieta-8,11,13-trien-18-oic acid; Dehydroabietate;	299.202	NA	7.94685	1	NULL	up
7.95_299.2018m/z	1.42279	0.0312107	0.0524259	0.777382	1.66111	CaseC:Control	C15353	C15353	C20H28O2	M-H	37.6	0	0.336347	88.3188	17alpha-Methyl-17beta-hydroxyandrosta-4,6-dien-3-one; 17alpha-Methyl-6,7-dehydrotestosterone;	299.202	NA	7.94685	1	NULL	up
7.95_299.2018m/z	1.42279	0.0312107	0.0524259	0.777382	1.66111	CaseC:Control	C14489	C14489	C20H28O2	M-H	37.6	0	0.336347	88.3188	19-Norprogesterone; 19-Norpregn-4-ene-3,20-dione;	299.202	NA	7.94685	1	NULL	up
7.95_299.2018m/z	1.42279	0.0312107	0.0524259	0.777382	1.66111	CaseC:Control	C14684	C14684	C20H28O2	M-H	37.6	0	0.336347	88.3188	17beta-Hydroxy-17-methylandrosta-4,9(11)-dien-3-one; 4,9(11)-Androstadien-17alpha-methyl-17beta-ol-3-one;	299.202	NA	7.94685	1	NULL	up
7.95_299.2018m/z	1.42279	0.0312107	0.0524259	0.777382	1.66111	CaseC:Control	C14652	C14652	C20H28O2	M-H	37.6	0	0.336347	88.3188	19-Nor-17alpha-pregn-5(10)-en-20-yne-3alpha,17beta-diol; 17alpha-Ethynylestr-5(10)-ene-3alpha,17beta-diol;	299.202	NA	7.94685	1	NULL	up
7.95_299.2018m/z	1.42279	0.0312107	0.0524259	0.777382	1.66111	CaseC:Control	C07058	C07058	C20H28O2	M-H	37.6	0	0.336347	88.3188	13-cis-Retinoic acid;	299.202	NA	7.94685	1	NULL	up
7.95_299.2018m/z	1.42279	0.0312107	0.0524259	0.777382	1.66111	CaseC:Control	C16683	C16683	C20H28O2	M-H	37.6	0	0.336347	88.3188	4-Oxoretinol;	299.202	NA	7.94685	1	map00830 Retinol metabolism	up
7.95_299.2018m/z	1.42279	0.0312107	0.0524259	0.777382	1.66111	CaseC:Control	C15263	C15263	C20H28O2	M-H	37.6	0	0.336347	88.3188	A-Norpregn-3(5)-ene-2,20-dione; A-Norprogesterone;	299.202	NA	7.94685	1	NULL	up
7.95_299.2018m/z	1.42279	0.0312107	0.0524259	0.777382	1.66111	CaseC:Control	C15493	C15493	C20H28O2	M-H	37.6	0	0.336347	88.3188	9-cis-Retinoic acid;	299.202	NA	7.94685	1	map00830 Retinol metabolism; map03320 PPAR signaling pathway; map04672 Intestinal immune network for IgA production; map04920 Adipocytokine signaling pathway; map05200 Pathways in cancer; map05222 Small cell lung cancer; map05223 Non-small cell lung cancer	up
7.95_299.2018m/z	1.42279	0.0312107	0.0524259	0.777382	1.66111	CaseC:Control	C14925	C14925	C20H28O2	M-H	37.6	0	0.336347	88.3188	17beta-Hydroxy-2-methylandrost-1,4-dien-3-one;	299.202	NA	7.94685	1	NULL	up
7.95_299.2018m/z	1.42279	0.0312107	0.0524259	0.777382	1.66111	CaseC:Control	C00777	C00777	C20H28O2	M-H	37.6	0	0.336347	88.3188	Retinoate; Retinoic acid; Vitamin A acid; all-trans-Retinoate; Acide retinoique (French) (DSL); Tretinoine (French) (	299.202	NA	7.94685	1	map00830 Retinol metabolism; map01100 Metabolic pathways; map04672 Intestinal immune network for IgA production; map05200 Pathways in cancer; map05222 Small cell lung cancer; map05223 Non-small cell lung cancer	up
7.95_299.2018m/z	1.42279	0.0312107	0.0524259	0.777382	1.66111	CaseC:Control	C09188	C09188	C20H28O2	M-H	37.6	0	0.336347	88.3188	Spruceanol;	299.202	NA	7.94685	1	NULL	up
7.95_299.2018m/z	1.42279	0.0312107	0.0524259	0.777382	1.66111	CaseC:Control	C15307	C15307	C20H28O2	M-H	37.6	0	0.336347	88.3188	17beta-Hydroxy-7alpha-methylandrost-1,4-diene-3-one; 1-Dehydro-7alpha-methyltestosterone;	299.202	NA	7.94685	1	NULL	up
7.95_317.2126m/z	1.36548	0.0443795	0.0524259	0.777382	1.44984	CaseC:Control	C02645	C02645	C20H30O3	M-H	39.5	0	1.08585	99.0395	4,5-Leukotriene A4;	317.213	NA	7.94685	1	NULL	up
7.95_317.2126m/z	1.36548	0.0443795	0.0524259	0.777382	1.44984	CaseC:Control	C14807	C14807	C20H30O3	M-H	39.5	0	1.08585	99.0395	12-OxoETE; 12-KETE; (5Z,8Z,10E,14Z)-12-Oxoeicosa-5,8,10,14-tetraenoic acid; (5Z,8Z,10E,14Z)-12-Oxoicosa-5,8,10,14-tetraenoic acid;	317.213	NA	7.94685	1	map00590 Arachidonic acid metabolism	up
7.95_317.2126m/z	1.36548	0.0443795	0.0524259	0.777382	1.44984	CaseC:Control	C18177	C18177	C20H30O3	M-H	39.5	0	1.08585	99.0395	18R-HEPE; 18R-Hydroxy-5Z,8Z,11Z,14Z,16E-eicosapentaenoic acid;	317.213	NA	7.94685	1	NULL	up
7.95_317.2126m/z	1.36548	0.0443795	0.0524259	0.777382	1.44984	CaseC:Control	C04577	C04577	C20H30O3	M-H	39.5	0	1.08585	99.0395	15-OxoETE; (5Z,8Z,11Z,13E)-15-Oxoicosa-5,8,11,13-tetraenoic acid; 15-Oxo-5,8,11-cis-13-trans-eicosatetraenoate; 15-Oxo-5,8,11-cis-13-trans-icosatetraenoate;	317.213	NA	7.94685	1	map00590 Arachidonic acid metabolism	up
7.95_317.2126m/z	1.36548	0.0443795	0.0524259	0.777382	1.44984	CaseC:Control	C13843	C13843	C20H30O3	M-H	39.5	0	1.08585	99.0395	17R,18S-Epoxy-5Z,8Z,11Z,14Z-icosatetraenoic acid; (5Z,8Z,11Z,14Z)-(17R,18S)-17,18-Epoxyicosa-5,8,11,14-tetraenoic acid;	317.213	NA	7.94685	1	NULL	up
7.95_317.2126m/z	1.36548	0.0443795	0.0524259	0.777382	1.44984	CaseC:Control	C15354	C15354	C20H30O3	M-H	39.5	0	1.08585	99.0395	17beta-Hydroxy-17-methyl-5alpha-androstane-3,11-dione;	317.213	NA	7.94685	1	NULL	up
7.95_317.2126m/z	1.36548	0.0443795	0.0524259	0.777382	1.44984	CaseC:Control	C11875	C11875	C20H30O3	M-H	39.5	0	1.08585	99.0395	ent-7alpha-Hydroxykaur-16-en-19-oic acid; (-)-Kaur-16-en-7beta-ol-19-oic acid; ent-7alpha-Hydroxykaur-16-en-19-oate;	317.213	NA	7.94685	1	map00904 Diterpenoid biosynthesis; map01110 Biosynthesis of secondary metabolites	up
7.95_317.2126m/z	1.36548	0.0443795	0.0524259	0.777382	1.44984	CaseC:Control	C20212	C20212	C20H30O3	M-H	39.5	0	1.08585	99.0395	Steviol;	317.213	NA	7.94685	1	NULL	up
7.95_317.2126m/z	1.36548	0.0443795	0.0524259	0.777382	1.44984	CaseC:Control	C14891	C14891	C20H30O3	M-H	39.5	0	1.08585	99.0395	7alpha,17beta-Dihydroxy-17alpha-methylandrost-4-en-3-one; 7alpha-Hydroxy-17alpha-methyltestosterone;	317.213	NA	7.94685	1	NULL	up
7.95_317.2126m/z	1.36548	0.0443795	0.0524259	0.777382	1.44984	CaseC:Control	C15434	C15434	C20H30O3	M-H	39.5	0	1.08585	99.0395	11beta,17beta-Dihydroxy-12alpha-methylandrost-4-en-3-one; 11beta-Hydroxy-12alpha-methyltestosterone;	317.213	NA	7.94685	1	NULL	up
7.95_317.2126m/z	1.36548	0.0443795	0.0524259	0.777382	1.44984	CaseC:Control	C00909	C00909	C20H30O3	M-H	39.5	0	1.08585	99.0395	Leukotriene A4; LTA4; (7E,9E,11Z,14Z)-(5S,6S)-5,6-Epoxyeicosa-7,9,11,14-tetraenoic acid; (7E,9E,11Z,14Z)-(5S,6S)-5,6-Epoxyeicosa-7,9,11,14-tetraenoate; (7E,9E,11Z,14Z)-(5S,6S)-5,6-Epoxyicosa-7,9,11,14-tetraenoate; (5S,6S,7E,9E,11Z,14Z)-5,6-Epoxyicosa-7,9,11,14-tetraenoate;	317.213	NA	7.94685	1	map00590 Arachidonic acid metabolism; map01100 Metabolic pathways; map04726 Serotonergic synapse; map07034 Eicosanoids	up
7.95_317.2126m/z	1.36548	0.0443795	0.0524259	0.777382	1.44984	CaseC:Control	C17498	C17498	C20H30O3	M-H	39.5	0	1.08585	99.0395	Galanolactone; (+)-Galanolactone;	317.213	NA	7.94685	1	NULL	up
7.95_317.2126m/z	1.36548	0.0443795	0.0524259	0.777382	1.44984	CaseC:Control	C14945	C14945	C20H30O3	M-H	39.5	0	1.08585	99.0395	3-Methoxy-16-methyl-estra-2,5(10)-diene-16beta,17beta-diol;	317.213	NA	7.94685	1	NULL	up
7.95_317.2126m/z	1.36548	0.0443795	0.0524259	0.777382	1.44984	CaseC:Control	C14683	C14683	C20H30O3	M-H	39.5	0	1.08585	99.0395	11beta,17beta-Dihydroxy-17-methylandrost-4-en-3-one; 11beta-Hydroxy-17alpha-methyltestosterone;	317.213	NA	7.94685	1	NULL	up
7.95_317.2126m/z	1.36548	0.0443795	0.0524259	0.777382	1.44984	CaseC:Control	C14555	C14555	C20H30O3	M-H	39.5	0	1.08585	99.0395	11alpha,17beta-Dihydroxy-17-methylandrost-4-en-3-one; 11alpha-Hydroxy-17alpha-methyltestosterone;	317.213	NA	7.94685	1	NULL	up
7.95_317.2126m/z	1.36548	0.0443795	0.0524259	0.777382	1.44984	CaseC:Control	C09110	C09110	C20H30O3	M-H	39.5	0	1.08585	99.0395	Ineketone;	317.213	NA	7.94685	1	NULL	up
7.95_317.2126m/z	1.36548	0.0443795	0.0524259	0.777382	1.44984	CaseC:Control	C14628	C14628	C20H30O3	M-H	39.5	0	1.08585	99.0395	4,5alpha-Dihydro-2-(hydroxymethylene)testosterone; 17beta-Hydroxy-2-hydroxymethylene-5alpha-androstan-3-one;	317.213	NA	7.94685	1	NULL	up
7.95_317.2126m/z	1.36548	0.0443795	0.0524259	0.777382	1.44984	CaseC:Control	C09079	C09079	C20H30O3	M-H	39.5	0	1.08585	99.0395	Cyathin A3;	317.213	NA	7.94685	1	NULL	up
7.95_317.2126m/z	1.36548	0.0443795	0.0524259	0.777382	1.44984	CaseC:Control	C14665	C14665	C20H30O3	M-H	39.5	0	1.08585	99.0395	Oranabol; Oxymesterone; 4,17beta-Dihydroxy-17alpha-methylandrost-4-en-3-one; 4-Hydroxy-17alpha-methyltestosterone;	317.213	NA	7.94685	1	NULL	up
7.95_317.2126m/z	1.36548	0.0443795	0.0524259	0.777382	1.44984	CaseC:Control	C14980	C14980	C20H30O3	M-H	39.5	0	1.08585	99.0395	16beta-Methyl-D-homo-17a-oxa-5alpha-androstane-3,17-dione;	317.213	NA	7.94685	1	NULL	up
7.95_317.2126m/z	1.36548	0.0443795	0.0524259	0.777382	1.44984	CaseC:Control	C14732	C14732	C20H30O3	M-H	39.5	0	1.08585	99.0395	5-OxoETE; (6E,8Z,11Z,14Z)-5-Oxoicosa-6,8,11,14-tetraenoic acid; 5-Oxoeicosatetraenoic acid; 5-Oxoicosatetraenoic acid;	317.213	NA	7.94685	1	map00590 Arachidonic acid metabolism	up
7.95_317.2126m/z	1.36548	0.0443795	0.0524259	0.777382	1.44984	CaseC:Control	C14929	C14929	C20H30O3	M-H	39.5	0	1.08585	99.0395	17beta-Hydroxy-16alpha-methoxy-androst-4-en-3-one;	317.213	NA	7.94685	1	NULL	up
7.95_317.2126m/z	1.36548	0.0443795	0.0524259	0.777382	1.44984	CaseC:Control	C17956	C17956	C20H30O3	M-H	39.5	0	1.08585	99.0395	Grandifloric acid;	317.213	NA	7.94685	1	NULL	up
7.95_375.1706m/z	1.41232	0.0146994	0.0146896	0.615581	1.72554	CaseC:Control	C08152	C08152	C22H28O3	M+Cl	31.6	0	-7.80701	66.9566	Norethindrone acetate; Norethisterone acetate;	375.171	NA	7.94685	1	NULL	up
7.95_375.1706m/z	1.41232	0.0146994	0.0146896	0.615581	1.72554	CaseC:Control	C15090	C15090	C22H28O3	M+Cl	31.6	0	-7.80701	66.9566	17-Hydroxy-3-oxo-17alpha-pregna-1,4-diene-21-carboxylic acid, gamma-lactone;	375.171	NA	7.94685	1	NULL	up
7.95_417.1389m/z	1.49126	0.0139279	0.0089307	0.586889	1.65703	CaseC:Control	NA	NULL	NA	NA	NA	NA	NA	NA	NA	NA	NA	NA	NA	NULL	up
7.95_417.1564n	1.5273	0.0424868	0.0630128	0.811589	2.04911	CaseC:Control	C06447	C06447	C20H23N3O7	M-H, M+Cl	31.8	0	6.7219	66.5256	2-N,6-N-Bis(2,3-dihydroxybenzoyl)-L-lysine amide;	452.106	417.156	7.94685	1	NULL	up
7.95_598.1053m/z	2.08222	0.0283824	0.0232306	0.658543	3.08368	CaseC:Control	NA	NULL	NA	NA	NA	NA	NA	NA	NA	NA	NA	NA	NA	NULL	up
7.96_361.2335m/z	2.07886	0.000916	0.00150469	0.310772	3.49396	CaseC:Control	NA	NULL	NA	NA	NA	NA	NA	NA	NA	NA	NA	NA	NA	NULL	up
8.05_455.3160m/z	1.96281	0.0206674	0.0185434	0.65388	1.83241	CaseC:Control	C16891	C16891	C29H44O4	M-H	38.5	10.6	-1.45005	83.5734	Callystatin A;	455.316	NA	8.04685	1	NULL	up
8.09_291.1963m/z	2.07711	0.000233	0.000206	0.10813	3.32513	CaseC:Control	C04672	C04672	C18H28O3	M-H	39.8	14.6	-1.04895	85.4485	(9Z,15Z)-(13S)-12,13-Epoxyoctadeca-9,11,15-trienoic acid; (9Z,15Z)-(13S)-12,13-Epoxyoctadeca-9,11,15-trienoate; (9Z)-(13S)-12,13-Epoxyoctadeca-9,11,15-trienoate; 12,13(S)-EOT; 12,13(S)-EOTrE;	291.196	NA	8.08972	1	map00592 alpha-Linolenic acid metabolism; map01100 Metabolic pathways; map01110 Biosynthesis of secondary metabolites	up
8.09_291.1963m/z	2.07711	0.000233	0.000206	0.10813	3.32513	CaseC:Control	C16325	C16325	C18H28O3	M-H	39.8	14.6	-1.04895	85.4485	10-OPDA; 10-Oxo-11,15-phytodienoic acid; (11Z,15Z)-10-Oxo-11,15-phytodienoic acid;	291.196	NA	8.08972	1	map00592 alpha-Linolenic acid metabolism; map01110 Biosynthesis of secondary metabolites	up
8.09_291.1963m/z	2.07711	0.000233	0.000206	0.10813	3.32513	CaseC:Control	C16319	C16319	C18H28O3	M-H	39.7	14.5	-1.04895	85.4485	Etherolenic acid; (9Z,11E,1'E,3'Z)-12-(1',3'-Hexadienyloxy)-9,11-dodecadienoic acid;	291.196	NA	8.08972	1	map00592 alpha-Linolenic acid metabolism	up
8.09_291.1963m/z	2.07711	0.000233	0.000206	0.10813	3.32513	CaseC:Control	C08319	C08319	C18H28O3	M-H	38.3	7.24	-1.04895	85.4485	alpha-Licanic acid; (9Z,11E,13E)-4-Oxooctadeca-9,11,13-trienoic acid; 4-Oxo-9,11,13-octadecatrienoic acid; 4-Oxo-cis-9,trans-11,trans-13-octadecatrienoic acid;	291.196	NA	8.08972	1	NULL	up
8.09_291.1963m/z	2.07711	0.000233	0.000206	0.10813	3.32513	CaseC:Control	C16320	C16320	C18H28O3	M-H	39.8	14.6	-1.04895	85.4485	Colnelenic acid; (8E)-9-[(1E,3Z,6Z)-Nona-1,3,6-trien-1-yloxy]non-8-enoate;	291.196	NA	8.08972	1	map00592 alpha-Linolenic acid metabolism; map01110 Biosynthesis of secondary metabolites	up
8.09_291.1963m/z	2.07711	0.000233	0.000206	0.10813	3.32513	CaseC:Control	C16324	C16324	C18H28O3	M-H	39.8	14.6	-1.04895	85.4485	9,10-EOT; 9,10-Epoxyoctadecatrienoic acid; (9S)-(10E,12Z,15Z)-9,10-Epoxyoctadecatri-10,12,15-enoic acid; 9,10-EOTrE;	291.196	NA	8.08972	1	map00592 alpha-Linolenic acid metabolism; map01110 Biosynthesis of secondary metabolites	up
8.09_291.1963m/z	2.07711	0.000233	0.000206	0.10813	3.32513	CaseC:Control	C14911	C14911	C18H28O3	M-H	38	5.95	-1.04895	85.4485	17beta-Hydroxy-2-oxa-5alpha-androstan-3-one;	291.196	NA	8.08972	1	NULL	up
8.09_291.1963m/z	2.07711	0.000233	0.000206	0.10813	3.32513	CaseC:Control	C13816	C13816	C18H28O3	M-H	39.8	14.7	-1.04895	85.4485	(9R,13R)-12-Oxo-phytodienoic acid; (9R,13R)-12-Oxo-phyto-10Z,15Z-dienoic acid; (10Z,15Z)-(9R,13R)-12-Oxophyto-10,15-dienoic acid;	291.196	NA	8.08972	1	NULL	up
8.09_291.1963m/z	2.07711	0.000233	0.000206	0.10813	3.32513	CaseC:Control	C01226	C01226	C18H28O3	M-H	39.8	14.7	-1.04895	85.4485	12-OPDA; (15Z)-12-Oxophyto-10,15-dienoate; (15Z)-12-Oxophyto-10,15-dienoic acid; 9(S),13(S)-12-Oxo-PDA; 12-Oxo-10,15(Z)-phytodienoic acid;	291.196	NA	8.08972	1	map00592 alpha-Linolenic acid metabolism; map01100 Metabolic pathways; map01110 Biosynthesis of secondary metabolites	up
8.12_331.2277m/z	1.39608	0.0430796	0.0892096	0.859831	1.17434	CaseC:Control	C18040	C18040	C21H32O3	M-H	37.5	0	-0.535014	88.1031	5alpha-Dihydrodeoxycorticosterone; 5alpha-Pregnan-21-ol-3,20-dione; Allopregnane-21-ol-3,20-dione;	331.228	NA	8.11828	1	map00140 Steroid hormone biosynthesis	up
8.12_331.2277m/z	1.39608	0.0430796	0.0892096	0.859831	1.17434	CaseC:Control	C04518	C04518	C21H32O3	M-H	37.5	0	-0.535014	88.1031	17alpha,20alpha-Dihydroxypregn-4-en-3-one;	331.228	NA	8.11828	1	map00140 Steroid hormone biosynthesis	up
8.12_331.2277m/z	1.39608	0.0430796	0.0892096	0.859831	1.17434	CaseC:Control	C05138	C05138	C21H32O3	M-H	37.5	0	-0.535014	88.1031	17alpha-Hydroxypregnenolone;	331.228	NA	8.11828	1	map00140 Steroid hormone biosynthesis; map01100 Metabolic pathways; map04913 Ovarian steroidogenesis	up
8.12_331.2277m/z	1.39608	0.0430796	0.0892096	0.859831	1.17434	CaseC:Control	C18038	C18038	C21H32O3	M-H	37.5	0	-0.535014	88.1031	7alpha-Hydroxypregnenolone; 3beta,7alpha-Dihydroxy-5-pregnen-20-one;	331.228	NA	8.11828	1	map00140 Steroid hormone biosynthesis	up
8.12_331.2277m/z	1.39608	0.0430796	0.0892096	0.859831	1.17434	CaseC:Control	C15384	C15384	C21H32O3	M-H	37.5	0	-0.535014	88.1031	12alpha-Hydroxy-5beta-pregnane-3,20-dione;	331.228	NA	8.11828	1	NULL	up
8.12_331.2277m/z	1.39608	0.0430796	0.0892096	0.859831	1.17434	CaseC:Control	C07393	C07393	C21H32O3	M-H	37.5	0	-0.535014	88.1031	Oxymetholone;	331.228	NA	8.11828	1	NULL	up
8.12_331.2277m/z	1.39608	0.0430796	0.0892096	0.859831	1.17434	CaseC:Control	C15405	C15405	C21H32O3	M-H	37.5	0	-0.535014	88.1031	17beta-Carbomethoxyandrost-5-en-3beta-ol; 3beta-Hydroxyandrost-5-ene-17beta-carboxylic acid methyl ester;	331.228	NA	8.11828	1	NULL	up
8.12_331.2277m/z	1.39608	0.0430796	0.0892096	0.859831	1.17434	CaseC:Control	C05485	C05485	C21H32O3	M-H	37.5	0	-0.535014	88.1031	21-Hydroxypregnenolone;	331.228	NA	8.11828	1	map00140 Steroid hormone biosynthesis	up
8.12_331.2277m/z	1.39608	0.0430796	0.0892096	0.859831	1.17434	CaseC:Control	C15401	C15401	C21H32O3	M-H	37.5	0	-0.535014	88.1031	11beta,17beta-Dihydroxy-4,17-dimethylandrost-4-en-3-one; 11beta-Hydroxy-4,17-dimethyltestosterone;	331.228	NA	8.11828	1	NULL	up
8.12_331.2277m/z	1.39608	0.0430796	0.0892096	0.859831	1.17434	CaseC:Control	C15011	C15011	C21H32O3	M-H	37.5	0	-0.535014	88.1031	11beta,17beta-Dihydroxy-6alpha,17-dimethylandrost-4-en-3-one;	331.228	NA	8.11828	1	NULL	up
8.12_331.2277m/z	1.39608	0.0430796	0.0892096	0.859831	1.17434	CaseC:Control	C15355	C15355	C21H32O3	M-H	37.5	0	-0.535014	88.1031	11alpha-Hydroxy-5beta-pregnane-3,20-dione;	331.228	NA	8.11828	1	NULL	up
8.12_331.2277m/z	1.39608	0.0430796	0.0892096	0.859831	1.17434	CaseC:Control	C13803	C13803	C21H32O3	M-H	37.5	0	-0.535014	88.1031	Alphaxalone; Alfaxalone;	331.228	NA	8.11828	1	NULL	up
8.12_331.2277m/z	1.39608	0.0430796	0.0892096	0.859831	1.17434	CaseC:Control	C06390	C06390	C21H32O3	M-H	37.5	0	-0.535014	88.1031	16-alpha-Hydroxypregnenolone; 16alpha-Hydroxypregnenolone;	331.228	NA	8.11828	1	NULL	up
8.12_331.2277m/z	1.39608	0.0430796	0.0892096	0.859831	1.17434	CaseC:Control	C15022	C15022	C21H32O3	M-H	37.5	0	-0.535014	88.1031	11alpha,17beta-Dihydroxy-2alpha,17-dimethylandrost-4-en-3-one;	331.228	NA	8.11828	1	NULL	up
8.16_417.2257m/z	1.78727	0.0288965	0.035463	0.74037	3.27226	CaseC:Control	C10746	C10746	C24H34O6	M-H	36.3	0	-6.03635	88.5286	Phyllanthin;	417.226	NA	8.16115	1	NULL	up
8.16_417.2257m/z	1.78727	0.0288965	0.035463	0.74037	3.27226	CaseC:Control	C15302	C15302	C24H34O6	M-H	36.3	0	-6.03635	88.5286	11beta,17,21-Trihydroxy-2alpha-methylpregn-4-ene-3,20-dione 21-acetate; 17-Hydroxy-2alpha-methylcorticosterone 21-acetate; 2alpha-Methylcortisol acetate;	417.226	NA	8.16115	1	NULL	up
8.16_417.2257m/z	1.78727	0.0288965	0.035463	0.74037	3.27226	CaseC:Control	C15275	C15275	C24H34O6	M-H	36.3	0	-6.03635	88.5286	21-Acetoxy-11beta,17-dihydroxy-6alpha-methylpregn-4-ene-3,20-dione; 17-Hydroxy-6alpha-methylcorticosterone 21-acetate;	417.226	NA	8.16115	1	NULL	up
8.16_417.2257m/z	1.78727	0.0288965	0.035463	0.74037	3.27226	CaseC:Control	C12062	C12062	C25H30N4O2	M-H	35.4	0	-9.23407	87.1788	Naphthyl dipeptide;	417.226	NA	8.16115	1	NULL	up
8.19_281.2272m/z	1.46272	0.0438054	0.0288056	0.691214	1.98569	CaseC:Control	NA	NULL	NA	NA	NA	NA	NA	NA	NA	NA	NA	NA	NA	NULL	up
8.30_263.1320m/z	0.645979	0.0177216	0.0146896	0.615581	1.15469	CaseC:Control	NA	NULL	NA	NA	NA	NA	NA	NA	NA	NA	NA	NA	NA	NULL	down
8.31_345.2437m/z	1.33384	0.0367809	0.0892096	0.859831	1.45696	CaseC:Control	C11898	C11898	C22H34O3	M-H	41	7.86	0.572383	97.7783	Taxa-4(20),11(12)-dien-5alpha-acetoxy-10beta-ol; 10beta-Hydroxytaxa-4(20),11-dien-5alpha-yl acetate; 5alpha-Acetoxytaxa-4(20),11(12)-dien-10beta-ol;	345.244	NA	8.31045	1	map00904 Diterpenoid biosynthesis	up
8.31_345.2437m/z	1.33384	0.0367809	0.0892096	0.859831	1.45696	CaseC:Control	C14976	C14976	C22H34O3	M-H	41.3	9.38	0.572383	97.7783	3alpha,21-Dihydroxy-D-homo-5beta-pregn-17a(20)-en-11-one;	345.244	NA	8.31045	1	NULL	up
8.31_345.2437m/z	1.33384	0.0367809	0.0892096	0.859831	1.45696	CaseC:Control	C10794	C10794	C22H34O3	M-H	41	7.86	0.572383	97.7783	Ginkgoic acid; Ginkgolic acid;	345.244	NA	8.31045	1	NULL	up
8.31_413.2296m/z	1.44943	0.0386515	0.0630128	0.811589	1.76764	CaseC:Control	NA	NULL	NA	NA	NA	NA	NA	NA	NA	NA	NA	NA	NA	NULL	up
8.34_311.0951m/z	2.28703	0.00939807	0.0185434	0.65388	3.4236	CaseC:Control	C10045	C10045	C18H16O5	M-H	37.1	0	8.28483	94.6262	3,5,7-Trimethoxyflavone; Galangin 3,5,7-trimethyl ether; Chromen-4-one, 3,5,7-trimethoxy-2-phenyl-;	311.095	NA	8.33903	1	NULL	up
8.34_311.0951m/z	2.28703	0.00939807	0.0185434	0.65388	3.4236	CaseC:Control	C18841	C18841	C18H16O5	M-H	37.1	0	8.28483	94.6262	R1128B;	311.095	NA	8.33903	1	NULL	up
8.34_311.0951m/z	2.28703	0.00939807	0.0185434	0.65388	3.4236	CaseC:Control	C17472	C17472	C18H16O5	M-H	37.1	0	8.28483	94.6262	Ophiopogonone B;	311.095	NA	8.33903	1	NULL	up
8.34_311.0951m/z	2.28703	0.00939807	0.0185434	0.65388	3.4236	CaseC:Control	C10024	C10024	C18H16O5	M-H	37.1	0	8.28483	94.6262	Baicalein 5,6,7-trimethyl ether;	311.095	NA	8.33903	1	NULL	up
8.34_311.0951m/z	2.28703	0.00939807	0.0185434	0.65388	3.4236	CaseC:Control	C19526	C19526	C18H16N2O	M+Cl	38.5	0	-2.10617	94.8415	Sudan II; C.I. Solvent Orange 7;	311.095	NA	8.33903	1	NULL	up
8.35_556.2183m/z	1.56608	0.036274	0.123005	0.885854	1.642	CaseC:Control	NA	NULL	NA	NA	NA	NA	NA	NA	NA	NA	NA	NA	NA	NULL	up
8.51_504.3100m/z	0.79542	0.0339404	0.0524259	0.777382	1.62375	CaseC:Control	NA	NULL	NA	NA	NA	NA	NA	NA	NA	NA	NA	NA	NA	NULL	down
8.51_564.3305m/z	0.790213	0.0367348	0.0524259	0.777382	1.6244	CaseC:Control	NA	NULL	NA	NA	NA	NA	NA	NA	NA	NA	NA	NA	NA	NULL	down
8.51_632.3175m/z	0.830486	0.0306996	0.035463	0.74037	1.51295	CaseC:Control	C12002	C12002	C31H51NO10	M+Cl	38.2	0.182	-5.36853	97.1198	5-O-beta-D-Mycaminosyltylonolide;	632.317	NA	8.51048	1	map00522 Biosynthesis of 12-, 14- and 16-membered macrolides; map01130 Biosynthesis of antibiotics	down
8.51_632.3175m/z	0.830486	0.0306996	0.035463	0.74037	1.51295	CaseC:Control	C10016	C10016	C32H47N5O6	M+Cl	37.4	0	-7.60742	95.5837	Zizyphine F;	632.317	NA	8.51048	1	NULL	down
8.51_650.2747m/z	0.831435	0.0412181	0.0524259	0.777382	1.43751	CaseC:Control	C08688	C08688	C33H45NO10	M+Cl	40.2	10.8	1.58383	91.9148	Hypaconitine;	650.275	NA	8.51048	1	NULL	down
8.51_777.2373m/z	0.805274	0.0329976	0.0630128	0.811589	1.60904	CaseC:Control	C21292	C21292	C40H43ClN2O12	M-H	37.3	17.7	-7.59478	77.4	NA	777.237	NA	8.51048	1	NULL	down
8.51_777.2373m/z	0.805274	0.0329976	0.0630128	0.811589	1.60904	CaseC:Control	C10543	C10543	C34H46O18	M+Cl	39.9	12	-0.741614	88.2871	Acanthoside D; (-)-Syringaresinol di-beta-D-glucoside;	777.237	NA	8.51048	1	NULL	down
8.51_777.2373m/z	0.805274	0.0329976	0.0630128	0.811589	1.60904	CaseC:Control	C20786	C20786	C34H46O18	M+Cl	39.9	12	-0.741614	88.2871	Eleutheroside E;	777.237	NA	8.51048	1	NULL	down
8.52_634.2561m/z	0.708868	0.00149785	0.00208924	0.389745	2.48266	CaseC:Control	C15620	C15620	C35H36F3N3O5	M-H	31.9	8.65	4.27575	55.631	GW 6471;	634.256	NA	8.52477	1	NULL	down
8.52_768.2884m/z	0.818053	0.0335573	0.0524259	0.777382	1.52107	CaseC:Control	NA	NULL	NA	NA	NA	NA	NA	NA	NA	NA	NA	NA	NA	NULL	down
8.57_970.2144m/z	0.823691	0.0350806	0.075256	0.833727	1.32976	CaseC:Control	C11539	C11539	C43H48CoN4O16	M+Cl	28	0	5.62078	46.5911	Cobalt-precorrin 3;	970.214	NA	8.5712	1	map00860 Porphyrin and chlorophyll metabolism; map01100 Metabolic pathways	down
8.59_313.1105m/z	1.92271	0.0221244	0.0185434	0.65388	2.79758	CaseC:Control	NA	NULL	NA	NA	NA	NA	NA	NA	NA	NA	NA	NA	NA	NULL	up
8.59_342.1135m/z	1.75025	0.0206605	0.0185434	0.65388	2.72486	CaseC:Control	C10855	C10855	C16H21NO5	M+Cl	35.3	0	7.01591	84.2766	Convoline;	342.114	NA	8.58835	1	NULL	up
8.59_342.1135m/z	1.75025	0.0206605	0.0185434	0.65388	2.72486	CaseC:Control	C18489	C18489	C16H22ClN3O	M+Cl	33.5	0.182	-3.29611	71.3273	Tebuconazole;	342.114	NA	8.58835	1	NULL	up
8.60_1167.5297m/z	0.479688	0.0478539	0.0892096	0.859831	2.60959	CaseC:Control	C16097	C16097	C50H80N14O14S	M+Cl	36.2	13.2	-8.49122	77.4198	Neurokinin A; Substance K; Neuromedin L;	1167.53	NA	8.60263	1	map04080 Neuroactive ligand-receptor interaction	down
8.60_524.2785m/z	1.21625	0.0232796	0.0185434	0.65388	1.31529	CaseC:Control	C15687	C15687	C28H43NO6	M+Cl	39.1	1.85	0.0569398	93.5127	Borrelidin;	524.278	NA	8.60263	1	NULL	up
8.60_524.3871m/z	1.5008	0.0354675	0.035463	0.74037	1.87859	CaseC:Control	NA	NULL	NA	NA	NA	NA	NA	NA	NA	NA	NA	NA	NA	NULL	up
8.60_592.2644m/z	1.24441	0.00716491	0.0114962	0.593596	1.5855	CaseC:Control	NA	NULL	NA	NA	NA	NA	NA	NA	NA	NA	NA	NA	NA	NULL	up
8.62_1111.5928m/z	1.24913	0.00545009	0.0089307	0.586889	1.48626	CaseC:Control	NA	NULL	NA	NA	NA	NA	NA	NA	NA	NA	NA	NA	NA	NULL	up
8.63_1084.6666n	0.757973	0.0113394	0.0185434	0.65388	1.97996	CaseC:Control	NA	NULL	NA	NA	NA	NA	NA	NA	NA	NA	NA	NA	NA	NULL	down
8.63_1169.6084m/z	0.769344	0.00801571	0.0114962	0.593596	1.88838	CaseC:Control	C13907	C13907	C52H100N2O20P2	M+Cl	38.2	14.4	4.01406	81.0969	OM-174; Triacyl lipid A OM-174; Triacyl lipid A;	1169.61	NA	8.63122	1	NULL	down
8.63_504.4168m/z	0.736366	0.0147565	0.0089307	0.586889	2.14979	CaseC:Control	NA	NULL	NA	NA	NA	NA	NA	NA	NA	NA	NA	NA	NA	NULL	down
8.63_504.4873m/z	0.633226	0.0132715	0.0146896	0.615581	2.53843	CaseC:Control	NA	NULL	NA	NA	NA	NA	NA	NA	NA	NA	NA	NA	NA	NULL	down
8.65_78.6733m/z	0.728746	0.00694475	0.00684146	0.534651	1.95512	CaseC:Control	NA	NULL	NA	NA	NA	NA	NA	NA	NA	NA	NA	NA	NA	NULL	down
8.66_606.2326m/z	1.21434	0.0490531	0.0892096	0.859831	1.36418	CaseC:Control	NA	NULL	NA	NA	NA	NA	NA	NA	NA	NA	NA	NA	NA	NULL	up
8.67_913.2075m/z	1.39179	0.00572072	0.00519604	0.534651	1.9954	CaseC:Control	NA	NULL	NA	NA	NA	NA	NA	NA	NA	NA	NA	NA	NA	NULL	up
8.73_452.2788m/z	1.21998	0.0234043	0.0232306	0.658543	1.39899	CaseC:Control	NA	NULL	NA	NA	NA	NA	NA	NA	NA	NA	NA	NA	NA	NULL	up
8.75_345.2437m/z	1.79386	0.000847	1.08e-05	0.0125203	3.04051	CaseC:Control	C11898	C11898	C22H34O3	M-H	37.8	0	0.522795	89.7888	Taxa-4(20),11(12)-dien-5alpha-acetoxy-10beta-ol; 10beta-Hydroxytaxa-4(20),11-dien-5alpha-yl acetate; 5alpha-Acetoxytaxa-4(20),11(12)-dien-10beta-ol;	345.244	NA	8.7455	1	map00904 Diterpenoid biosynthesis	up
8.75_345.2437m/z	1.79386	0.000847	1.08e-05	0.0125203	3.04051	CaseC:Control	C14976	C14976	C22H34O3	M-H	37.8	0	0.522795	89.7888	3alpha,21-Dihydroxy-D-homo-5beta-pregn-17a(20)-en-11-one;	345.244	NA	8.7455	1	NULL	up
8.75_345.2437m/z	1.79386	0.000847	1.08e-05	0.0125203	3.04051	CaseC:Control	C10794	C10794	C22H34O3	M-H	37.8	0	0.522795	89.7888	Ginkgoic acid; Ginkgolic acid;	345.244	NA	8.7455	1	NULL	up
8.75_552.2020m/z	1.31653	0.0215489	0.0630128	0.811589	1.78258	CaseC:Control	NA	NULL	NA	NA	NA	NA	NA	NA	NA	NA	NA	NA	NA	NULL	up
8.75_588.2514m/z	1.23311	0.031072	0.0524259	0.777382	1.56401	CaseC:Control	NA	NULL	NA	NA	NA	NA	NA	NA	NA	NA	NA	NA	NA	NULL	up
8.77_295.2280m/z	1.39236	0.0321425	0.075256	0.833727	1.3257	CaseC:Control	C19617	C19617	C18H32O3	M-H	38.1	0	0.323467	90.8925	18-Oxooleate;	295.228	NA	8.77408	1	map00073 Cutin, suberine and wax biosynthesis	up
8.77_295.2280m/z	1.39236	0.0321425	0.075256	0.833727	1.3257	CaseC:Control	C14767	C14767	C18H32O3	M-H	38.1	0	0.323467	90.8925	9(S)-HODE; (9S)-Hydroxyoctadecadienoic acid; (10E,12Z)-(9S)-9-Hydroxyoctadeca-10,12-dienoic acid;	295.228	NA	8.77408	1	map00591 Linoleic acid metabolism; map03320 PPAR signaling pathway	up
8.77_295.2280m/z	1.39236	0.0321425	0.075256	0.833727	1.3257	CaseC:Control	C14762	C14762	C18H32O3	M-H	38.1	0	0.323467	90.8925	13(S)-HODE; (13S)-Hydroxyoctadecadienoic acid; (9Z,11E)-(13S)-13-Hydroxyoctadeca-9,11-dienoic acid;	295.228	NA	8.77408	1	map00591 Linoleic acid metabolism; map03320 PPAR signaling pathway	up
8.77_295.2280m/z	1.39236	0.0321425	0.075256	0.833727	1.3257	CaseC:Control	C14825	C14825	C18H32O3	M-H	38.1	0	0.323467	90.8925	9(10)-EpOME; (9R,10S)-(12Z)-9,10-Epoxyoctadecenoic acid;	295.228	NA	8.77408	1	map00591 Linoleic acid metabolism; map01100 Metabolic pathways	up
8.77_295.2280m/z	1.39236	0.0321425	0.075256	0.833727	1.3257	CaseC:Control	C14826	C14826	C18H32O3	M-H	38.1	0	0.323467	90.8925	12(13)-EpOME; (12R,13S)-(9Z)-12,13-Epoxyoctadecenoic acid;	295.228	NA	8.77408	1	map00591 Linoleic acid metabolism; map01100 Metabolic pathways	up
8.77_295.2280m/z	1.39236	0.0321425	0.075256	0.833727	1.3257	CaseC:Control	C08318	C08318	C18H32O3	M-H	38.1	0	0.323467	90.8925	(9Z,12Z)-(8R)-Hydroxyoctadeca-9,12-dienoic acid; Laetisaric acid; 8-Hydroxylinoleic acid;	295.228	NA	8.77408	1	NULL	up
8.77_295.2280m/z	1.39236	0.0321425	0.075256	0.833727	1.3257	CaseC:Control	C08368	C08368	C18H32O3	M-H	38.1	0	0.323467	90.8925	Vernolic acid; (9Z)-(12S,13R)-12,13-Epoxyoctadecenoic acid; cis-12,13-Epoxy-cis-9-octadecenoic acid;	295.228	NA	8.77408	1	NULL	up
8.80_1135.6904m/z	0.726928	0.0194246	0.0185434	0.65388	1.66371	CaseC:Control	NA	NULL	NA	NA	NA	NA	NA	NA	NA	NA	NA	NA	NA	NULL	down
8.80_1153.6582m/z	0.651658	0.022643	0.0185434	0.65388	2.23628	CaseC:Control	NA	NULL	NA	NA	NA	NA	NA	NA	NA	NA	NA	NA	NA	NULL	down
8.80_305.2488m/z	0.61491	0.0188012	0.035463	0.74037	2.24793	CaseC:Control	C03242	C03242	C20H34O2	M-H	37.7	1.43	0.588304	87.5945	(8Z,11Z,14Z)-Icosatrienoic acid; Dihomo-gamma-linolenic acid; (Z,Z,Z)-8,11,14-Eicosatrienoic acid; (Z,Z,Z)-8,11,14-Icosatrienoic acid; (Z,Z,Z)-8,11,14-Eicosatrienoate; (Z,Z,Z)-8,11,14-Icosatrienoate; 8,11,14-Eicosatrienoate; 8,11,14-Icosatrienoate;	305.249	NA	8.80267	1	map00591 Linoleic acid metabolism; map01040 Biosynthesis of unsaturated fatty acids; map01100 Metabolic pathways	down
8.80_305.2488m/z	0.61491	0.0188012	0.035463	0.74037	2.24793	CaseC:Control	C09072	C09072	C20H34O2	M-H	37.4	0	0.588304	87.5945	2,7,11-Cembratrien-4,6-diol;	305.249	NA	8.80267	1	NULL	down
8.80_305.2488m/z	0.61491	0.0188012	0.035463	0.74037	2.24793	CaseC:Control	C16522	C16522	C20H34O2	M-H	37.6	1.23	0.588304	87.5945	Icosatrienoic acid; Eicosatrienoic acid; ETA; 11,14,17-Icosatrienoic acid; (11Z,14Z,17Z)-Icosa-11,14,17-trienoic acid; 11,14,17-Eicosatrienoic acid; (11Z,14Z,17Z)-Eicosa-11,14,17-trienoic acid;	305.249	NA	8.80267	1	map01040 Biosynthesis of unsaturated fatty acids	down
8.80_305.2488m/z	0.61491	0.0188012	0.035463	0.74037	2.24793	CaseC:Control	C15058	C15058	C20H34O2	M-H	37.4	0	0.588304	87.5945	2alpha-Methyl-5alpha-androstane-3beta,17beta-diol;	305.249	NA	8.80267	1	NULL	down
8.80_305.2488m/z	0.61491	0.0188012	0.035463	0.74037	2.24793	CaseC:Control	C15376	C15376	C20H34O2	M-H	37.4	0	0.588304	87.5945	17alpha-Methyl-5alpha-androstane-3alpha,17beta-diol;	305.249	NA	8.80267	1	NULL	down
8.80_305.2488m/z	0.61491	0.0188012	0.035463	0.74037	2.24793	CaseC:Control	C13273	C13273	C20H34O2	M-H	37.6	0.896	0.588304	87.5945	Plaunotol; 18-Hydroxygeranylgeraniol;	305.249	NA	8.80267	1	map00904 Diterpenoid biosynthesis; map01110 Biosynthesis of secondary metabolites	down
8.80_305.2488m/z	0.61491	0.0188012	0.035463	0.74037	2.24793	CaseC:Control	C14882	C14882	C20H34O2	M-H	37.4	0	0.588304	87.5945	2alpha-Methyl-5alpha-androstane-3alpha,17beta-diol;	305.249	NA	8.80267	1	NULL	down
8.80_305.2488m/z	0.61491	0.0188012	0.035463	0.74037	2.24793	CaseC:Control	C15399	C15399	C20H34O2	M-H	37.4	0	0.588304	87.5945	17-Methyl-5alpha-androstane-11beta,17beta-diol;	305.249	NA	8.80267	1	NULL	down
8.80_658.3314m/z	0.796839	0.00964485	0.0232306	0.658543	1.63387	CaseC:Control	NA	NULL	NA	NA	NA	NA	NA	NA	NA	NA	NA	NA	NA	NULL	down
8.80_662.2719m/z	0.773546	0.0134793	0.0185434	0.65388	1.70504	CaseC:Control	NA	NULL	NA	NA	NA	NA	NA	NA	NA	NA	NA	NA	NA	NULL	down
8.80_726.3175m/z	0.628125	0.0009	0.00105003	0.276016	2.76814	CaseC:Control	NA	NULL	NA	NA	NA	NA	NA	NA	NA	NA	NA	NA	NA	NULL	down
8.82_1085.6748m/z	0.676505	0.00994627	0.0146896	0.615581	2.14101	CaseC:Control	NA	NULL	NA	NA	NA	NA	NA	NA	NA	NA	NA	NA	NA	NULL	down
8.86_452.2794m/z	1.24411	0.0141917	0.0232306	0.658543	1.49412	CaseC:Control	NA	NULL	NA	NA	NA	NA	NA	NA	NA	NA	NA	NA	NA	NULL	up
8.86_947.6085m/z	1.25334	0.0201903	0.075256	0.833727	1.50346	CaseC:Control	NA	NULL	NA	NA	NA	NA	NA	NA	NA	NA	NA	NA	NA	NULL	up
8.87_452.3278m/z	1.22418	0.0361007	0.00684146	0.534651	1.46214	CaseC:Control	NA	NULL	NA	NA	NA	NA	NA	NA	NA	NA	NA	NA	NA	NULL	up
8.89_552.2025m/z	1.29801	0.0157709	0.0185434	0.65388	1.67094	CaseC:Control	NA	NULL	NA	NA	NA	NA	NA	NA	NA	NA	NA	NA	NA	NULL	up
8.89_822.4675m/z	1.27871	0.0410937	0.035463	0.74037	1.28986	CaseC:Control	NA	NULL	NA	NA	NA	NA	NA	NA	NA	NA	NA	NA	NA	NULL	up
8.92_1026.5214m/z	1.73615	0.000896	0.000725	0.220753	2.20401	CaseC:Control	NA	NULL	NA	NA	NA	NA	NA	NA	NA	NA	NA	NA	NA	NULL	up
8.92_301.3031m/z	1.71925	0.0292364	0.0114962	0.593596	2.51436	CaseC:Control	NA	NULL	NA	NA	NA	NA	NA	NA	NA	NA	NA	NA	NA	NULL	up
8.92_402.1506n	1.29335	0.0310422	0.0288056	0.691214	1.40039	CaseC:Control	NA	NULL	NA	NA	NA	NA	NA	NA	NA	NA	NA	NA	NA	NULL	up
8.92_429.0876m/z	1.51647	0.0315648	0.0288056	0.691214	1.84341	CaseC:Control	C15371	C15371	C20H27BrO3	M+Cl	27.2	0	9.65941	46.4537	9-Bromo-17beta-hydroxy-17-methylandrost-4-ene-3,11-dione;	429.088	NA	8.9234	1	NULL	up
8.92_437.1926m/z	1.20645	0.0324399	0.035463	0.74037	1.17445	CaseC:Control	C17446	C17446	C26H30O6	M-H	36	0.536	-9.85183	90.4714	Kurarinone;	437.193	NA	8.9234	1	NULL	up
8.92_439.1180m/z	1.21187	0.0253995	0.0288056	0.691214	1.1037	CaseC:Control	C10708	C10708	C21H24O8	M+Cl	30.2	0.288	3.68868	54.9089	Mallotophenone;	439.118	NA	8.9234	1	NULL	up
8.92_556.1405m/z	1.47812	0.0391084	0.0232306	0.658543	1.98317	CaseC:Control	NA	NULL	NA	NA	NA	NA	NA	NA	NA	NA	NA	NA	NA	NULL	up
8.92_625.4213m/z	1.64037	0.0179318	0.00388621	0.468207	2.18989	CaseC:Control	NA	NULL	NA	NA	NA	NA	NA	NA	NA	NA	NA	NA	NA	NULL	up
8.92_686.3618m/z	1.35432	0.0299639	0.0288056	0.691214	1.73853	CaseC:Control	NA	NULL	NA	NA	NA	NA	NA	NA	NA	NA	NA	NA	NA	NULL	up
8.92_693.4081m/z	1.60136	0.0183447	0.00684146	0.534651	2.36337	CaseC:Control	NA	NULL	NA	NA	NA	NA	NA	NA	NA	NA	NA	NA	NA	NULL	up
8.92_773.3399m/z	1.38472	0.0409566	0.0524259	0.777382	1.92354	CaseC:Control	NA	NULL	NA	NA	NA	NA	NA	NA	NA	NA	NA	NA	NA	NULL	up
8.94_1038.4830m/z	1.63335	0.0150672	0.0232306	0.658543	2.00137	CaseC:Control	NA	NULL	NA	NA	NA	NA	NA	NA	NA	NA	NA	NA	NA	NULL	up
8.94_258.2308m/z	1.5404	0.0309305	0.0146896	0.615581	2.21871	CaseC:Control	NA	NULL	NA	NA	NA	NA	NA	NA	NA	NA	NA	NA	NA	NULL	up
8.94_301.2182m/z	1.3952	0.0109183	0.00519604	0.534651	1.50597	CaseC:Control	C12083	C12083	C20H30O2	M-H	40.8	8.31	2.93169	99.1796	(5Z,7E,9E,14Z,17Z)-Eicosapentaenoic acid; (5Z,7E,9E,14Z,17Z)-Eicosapentaenoate;	301.218	NA	8.93768	1	map04750 Inflammatory mediator regulation of TRP channels	up
8.94_301.2182m/z	1.3952	0.0109183	0.00519604	0.534651	1.50597	CaseC:Control	C11889	C11889	C20H30O2	M-H	40.8	8.32	2.93169	99.1796	Neoabietic acid;	301.218	NA	8.93768	1	map00904 Diterpenoid biosynthesis; map01110 Biosynthesis of secondary metabolites	up
8.94_301.2182m/z	1.3952	0.0109183	0.00519604	0.534651	1.50597	CaseC:Control	C06428	C06428	C20H30O2	M-H	40.9	8.74	2.93169	99.1796	(5Z,8Z,11Z,14Z,17Z)-Icosapentaenoic acid; (5Z,8Z,11Z,14Z,17Z)-Eicosapentaenoic acid; Eicosapentaenoic acid; 5,8,11,14,17-Icosapentaenoic acid; (5Z,8Z,11Z,14Z,17Z)-Eicosapentaenoate;	301.218	NA	8.93768	1	map01040 Biosynthesis of unsaturated fatty acids	up
8.94_301.2182m/z	1.3952	0.0109183	0.00519604	0.534651	1.50597	CaseC:Control	C11888	C11888	C20H30O2	M-H	40.8	8.32	2.93169	99.1796	Levopimaric acid; L-Pimaric acid;	301.218	NA	8.93768	1	map00904 Diterpenoid biosynthesis; map01110 Biosynthesis of secondary metabolites	up
8.94_301.2182m/z	1.3952	0.0109183	0.00519604	0.534651	1.50597	CaseC:Control	C12077	C12077	C20H30O2	M-H	40.8	8.2	2.93169	99.1796	Palustric acid; NSC 148945; 8,13-Abietadien-18-oic acid;	301.218	NA	8.93768	1	map00904 Diterpenoid biosynthesis; map01110 Biosynthesis of secondary metabolites	up
8.94_301.2182m/z	1.3952	0.0109183	0.00519604	0.534651	1.50597	CaseC:Control	C20208	C20208	C20H30O2	M-H	40.1	4.95	2.93169	99.1796	syn-Stemoden-19-oate;	301.218	NA	8.93768	1	map00904 Diterpenoid biosynthesis; map01110 Biosynthesis of secondary metabolites	up
8.94_301.2182m/z	1.3952	0.0109183	0.00519604	0.534651	1.50597	CaseC:Control	C14890	C14890	C20H30O2	M-H	39.6	2.24	2.93169	99.1796	17beta-Hydroxy-6beta-methylandrost-4-en-3-one; 6beta-Methyltestosterone;	301.218	NA	8.93768	1	NULL	up
8.94_301.2182m/z	1.3952	0.0109183	0.00519604	0.534651	1.50597	CaseC:Control	C15318	C15318	C20H30O2	M-H	39.7	2.68	2.93169	99.1796	17abeta-Hydroxy-D-homoandrost-4-en-3-one; D-Homotestosterone;	301.218	NA	8.93768	1	NULL	up
8.94_301.2182m/z	1.3952	0.0109183	0.00519604	0.534651	1.50597	CaseC:Control	C15188	C15188	C20H30O2	M-H	39.2	0.459	2.93169	99.1796	19-Nor-5alpha-pregnane-3,20-dione;	301.218	NA	8.93768	1	NULL	up
8.94_301.2182m/z	1.3952	0.0109183	0.00519604	0.534651	1.50597	CaseC:Control	C14490	C14490	C20H30O2	M-H	40.1	4.97	2.93169	99.1796	Stenbolone; 17beta-Hydroxy-2-methyl-5alpha-androst-1-en-3-one;	301.218	NA	8.93768	1	NULL	up
8.94_301.2182m/z	1.3952	0.0109183	0.00519604	0.534651	1.50597	CaseC:Control	C15460	C15460	C20H30O2	M-H	39.7	2.7	2.93169	99.1796	17beta-Hydroxy-17-methyl-5alpha-androst-9(11)-en-3-one;	301.218	NA	8.93768	1	NULL	up
8.94_301.2182m/z	1.3952	0.0109183	0.00519604	0.534651	1.50597	CaseC:Control	C15184	C15184	C20H30O2	M-H	39.6	2.24	2.93169	99.1796	17beta-Hydroxy-6alpha-methylandrost-4-en-3-one; 6alpha-Methyltestosterone;	301.218	NA	8.93768	1	NULL	up
8.94_301.2182m/z	1.3952	0.0109183	0.00519604	0.534651	1.50597	CaseC:Control	C11874	C11874	C20H30O2	M-H	40.1	4.95	2.93169	99.1796	Kaur-16-en-18-oic acid; (-)-Kaur-16-en-19-oic acid; Kaurenic acid; Kaurenoic acid; ent-Kaur-16(17)-en-19-oic acid; ent-Kaurenoic acid; ent-Kaur-16-en-19-oic acid; ent-Kaur-16-en-19-oate;	301.218	NA	8.93768	1	map00904 Diterpenoid biosynthesis; map01100 Metabolic pathways; map01110 Biosynthesis of secondary metabolites	up
8.94_301.2182m/z	1.3952	0.0109183	0.00519604	0.534651	1.50597	CaseC:Control	C15017	C15017	C20H30O2	M-H	40.1	4.97	2.93169	99.1796	17beta-Hydroxy-5alpha-androst-2-ene-2-carboxaldehyde;	301.218	NA	8.93768	1	NULL	up
8.94_301.2182m/z	1.3952	0.0109183	0.00519604	0.534651	1.50597	CaseC:Control	C15070	C15070	C20H30O2	M-H	39.7	2.68	2.93169	99.1796	17beta-Hydroxy-1,17-dimethylestr-5(10)-en-3-one;	301.218	NA	8.93768	1	NULL	up
8.94_301.2182m/z	1.3952	0.0109183	0.00519604	0.534651	1.50597	CaseC:Control	C09159	C09159	C20H30O2	M-H	40.8	8.32	2.93169	99.1796	(+)-Pimaric acid; Dextropimaric acid;	301.218	NA	8.93768	1	NULL	up
8.94_301.2182m/z	1.3952	0.0109183	0.00519604	0.534651	1.50597	CaseC:Control	C20149	C20149	C20H30O2	M-H	40.8	8.2	2.93169	99.1796	9beta-Pimara-7,15-dien-19-oate;	301.218	NA	8.93768	1	map00904 Diterpenoid biosynthesis; map01110 Biosynthesis of secondary metabolites	up
8.94_301.2182m/z	1.3952	0.0109183	0.00519604	0.534651	1.50597	CaseC:Control	C15008	C15008	C20H30O2	M-H	39.7	2.68	2.93169	99.1796	1,2,3,4,4a,9,10,10a-Octahydro-6-hydroxy-7-isopropyl-1,4a-dimethyl-1-phenanthrenemethanol;	301.218	NA	8.93768	1	NULL	up
8.94_301.2182m/z	1.3952	0.0109183	0.00519604	0.534651	1.50597	CaseC:Control	C15003	C15003	C20H30O2	M-H	39.7	2.68	2.93169	99.1796	17-Hydroxy-19-nor-17alpha-pregn-5(10)-en-3-one;	301.218	NA	8.93768	1	NULL	up
8.94_301.2182m/z	1.3952	0.0109183	0.00519604	0.534651	1.50597	CaseC:Control	C15412	C15412	C20H30O2	M-H	39.6	2.24	2.93169	99.1796	17beta-Hydroxy-4-methylandrost-4-en-3-one; 4-Methyltestosterone;	301.218	NA	8.93768	1	NULL	up
8.94_301.2182m/z	1.3952	0.0109183	0.00519604	0.534651	1.50597	CaseC:Control	C14255	C14255	C20H30O2	M-H	39.7	2.68	2.93169	99.1796	Mibolerone; 17-beta-Hydroxy-7-alpha,17-dimethylestr-4-en-3-one;	301.218	NA	8.93768	1	NULL	up
8.94_301.2182m/z	1.3952	0.0109183	0.00519604	0.534651	1.50597	CaseC:Control	C06087	C06087	C20H30O2	M-H	40.8	8.2	2.93169	99.1796	Abietate; Abietic acid;	301.218	NA	8.93768	1	map00904 Diterpenoid biosynthesis; map01100 Metabolic pathways; map01110 Biosynthesis of secondary metabolites	up
8.94_301.2182m/z	1.3952	0.0109183	0.00519604	0.534651	1.50597	CaseC:Control	C14588	C14588	C20H30O2	M-H	39.6	2.24	2.93169	99.1796	17beta-Hydroxy-7alpha-methylandrost-4-en-3-one; 7alpha-Methyltestosterone;	301.218	NA	8.93768	1	NULL	up
8.94_301.2182m/z	1.3952	0.0109183	0.00519604	0.534651	1.50597	CaseC:Control	C15036	C15036	C20H30O2	M-H	39.2	0.459	2.93169	99.1796	2alpha-Methyl-5alpha-androstane-3,17-dione;	301.218	NA	8.93768	1	NULL	up
8.94_301.2182m/z	1.3952	0.0109183	0.00519604	0.534651	1.50597	CaseC:Control	C15259	C15259	C20H30O2	M-H	39.7	2.68	2.93169	99.1796	17beta-Hydroxy-2alpha,17-dimethylestr-4-en-3-one; 2alpha,17-Dimethyl-19-nortestosterone;	301.218	NA	8.93768	1	NULL	up
8.94_301.2182m/z	1.3952	0.0109183	0.00519604	0.534651	1.50597	CaseC:Control	C09148	C09148	C20H30O2	M-H	40.4	6.06	2.93169	99.1796	Oryzalexin A;	301.218	NA	8.93768	1	NULL	up
8.94_301.2182m/z	1.3952	0.0109183	0.00519604	0.534651	1.50597	CaseC:Control	C07198	C07198	C20H30O2	M-H	39.7	2.68	2.93169	99.1796	Methyltestosterone;	301.218	NA	8.93768	1	NULL	up
8.94_301.2182m/z	1.3952	0.0109183	0.00519604	0.534651	1.50597	CaseC:Control	C09118	C09118	C20H30O2	M-H	40.8	8.2	2.93169	99.1796	Isopimaric acid;	301.218	NA	8.93768	1	map00904 Diterpenoid biosynthesis; map01110 Biosynthesis of secondary metabolites	up
8.94_301.3544m/z	1.83493	0.0385755	0.0185434	0.65388	2.99012	CaseC:Control	NA	NULL	NA	NA	NA	NA	NA	NA	NA	NA	NA	NA	NA	NULL	up
8.94_325.2177m/z	1.27527	0.0205218	0.0288056	0.691214	1.54506	CaseC:Control	C15190	C15190	C22H30O2	M-H	39.4	1.26	1.36385	97.6212	12alpha-Methylpregna-4,9(11)-diene-3,20-dione;	325.218	NA	8.93768	1	NULL	up
8.94_325.2177m/z	1.27527	0.0205218	0.0288056	0.691214	1.54506	CaseC:Control	C14208	C14208	C22H30O2	M-H	39.4	1.04	1.36385	97.6212	Promegestone;	325.218	NA	8.93768	1	NULL	up
8.94_347.2223m/z	1.31348	0.00244211	0.00684146	0.534651	1.70181	CaseC:Control	C05478	C05478	C21H32O4	M-H	38.8	9.44	-1.31381	86.2319	3alpha,21-Dihydroxy-5beta-pregnane-11,20-dione; 5beta-Pregnane-3alpha,21-diol-11,20-dione;	347.222	NA	8.93768	1	map00140 Steroid hormone biosynthesis	up
8.94_347.2223m/z	1.31348	0.00244211	0.00684146	0.534651	1.70181	CaseC:Control	C15685	C15685	C21H32O4	M-H	37	0.302	-1.31381	86.2319	Protomycinolide IV;	347.222	NA	8.93768	1	map01130 Biosynthesis of antibiotics	up
8.94_347.2223m/z	1.31348	0.00244211	0.00684146	0.534651	1.70181	CaseC:Control	C05475	C05475	C21H32O4	M-H	38.9	9.76	-1.31381	86.2319	11beta,21-Dihydroxy-5beta-pregnane-3,20-dione; 5beta-Pregnane-11beta,21-diol-3,20-dione;	347.222	NA	8.93768	1	map00140 Steroid hormone biosynthesis	up
8.94_347.2223m/z	1.31348	0.00244211	0.00684146	0.534651	1.70181	CaseC:Control	C05487	C05487	C21H32O4	M-H	38.7	9.07	-1.31381	86.2319	17alpha,21-Dihydroxypregnenolone;	347.222	NA	8.93768	1	map00140 Steroid hormone biosynthesis	up
8.94_347.2223m/z	1.31348	0.00244211	0.00684146	0.534651	1.70181	CaseC:Control	C14598	C14598	C21H32O4	M-H	38.8	9.44	-1.31381	86.2319	3alpha,17alpha-Dihydroxy-5beta-pregnane-11,20-dione; 17alpha-Hydroxy-11-ketopregnanolone;	347.222	NA	8.93768	1	NULL	up
8.94_359.1730m/z	1.40725	0.00535984	0.00684146	0.534651	1.81041	CaseC:Control	NA	NULL	NA	NA	NA	NA	NA	NA	NA	NA	NA	NA	NA	NULL	up
8.94_369.2056m/z	1.30394	0.00330714	0.00287947	0.426974	1.38641	CaseC:Control	C18488	C18488	C23H30O4	M-H	39.6	4.89	-4.08746	97.9366	Spiromesifen;	369.206	NA	8.93768	1	NULL	up
8.94_633.4894m/z	1.42391	0.0447856	0.0288056	0.691214	2.13709	CaseC:Control	NA	NULL	NA	NA	NA	NA	NA	NA	NA	NA	NA	NA	NA	NULL	up
8.94_684.3618m/z	1.37896	0.00174617	0.00287947	0.426974	2.05935	CaseC:Control	C13901	C13901	C32H60NO10P	M+Cl	37.1	5.54	-4.82443	85.5954	1-Palmitoyl-2-(5-hydroxy-8-oxo-6-octenoyl)-sn-glycero-3-phosphatidylcholine;	684.362	NA	8.93768	1	NULL	up
8.94_705.3614m/z	1.32601	0.00958966	0.00684146	0.534651	1.47219	CaseC:Control	C13299	C13299	C35H58O12	M+Cl	31.9	0	-1.29465	61.0434	Fungichromin; Pentamycin;	705.361	NA	8.93768	1	NULL	up
8.94_822.5631m/z	1.32155	0.0365569	0.0288056	0.691214	1.34565	CaseC:Control	NA	NULL	NA	NA	NA	NA	NA	NA	NA	NA	NA	NA	NA	NULL	up
8.94_890.5497m/z	1.58221	0.0214336	0.0146896	0.615581	1.87928	CaseC:Control	NA	NULL	NA	NA	NA	NA	NA	NA	NA	NA	NA	NA	NA	NULL	up
8.94_937.5755m/z	1.82363	0.0348061	0.0432571	0.762669	2.63213	CaseC:Control	NA	NULL	NA	NA	NA	NA	NA	NA	NA	NA	NA	NA	NA	NULL	up
8.94_952.5182m/z	1.59802	0.0297078	0.105122	0.863527	2.69279	CaseC:Control	NA	NULL	NA	NA	NA	NA	NA	NA	NA	NA	NA	NA	NA	NULL	up
8.94_958.5362m/z	1.73144	0.0313014	0.0185434	0.65388	2.1821	CaseC:Control	NA	NULL	NA	NA	NA	NA	NA	NA	NA	NA	NA	NA	NA	NULL	up
8.94_961.5803m/z	2.10289	0.0444743	0.0892096	0.859831	2.30569	CaseC:Control	NA	NULL	NA	NA	NA	NA	NA	NA	NA	NA	NA	NA	NA	NULL	up
8.95_675.3437m/z	1.35105	0.043407	0.0524259	0.777382	1.74953	CaseC:Control	NA	NULL	NA	NA	NA	NA	NA	NA	NA	NA	NA	NA	NA	NULL	up
8.97_418.1327m/z	1.20702	0.0153706	0.0288056	0.691214	1.27611	CaseC:Control	C18680	C18680	C24H21NO6	M-H	30.4	4.2	7.28741	55.7506	Jadomycin A; Jadomycin B aglycon;	418.133	NA	8.96625	1	map01057 Biosynthesis of type II polyketide products; map01130 Biosynthesis of antibiotics	up
8.97_418.1327m/z	1.20702	0.0153706	0.0288056	0.691214	1.27611	CaseC:Control	C07397	C07397	C21H25N3O2S	M+Cl	29.4	0	-9.09257	56.7721	Quetiapine; 2-[2-(4-Dibenzo[b,f][1,4]thiazepin-11-yl-1-piperazinyl)ethoxy]ethanol;	418.133	NA	8.96625	1	NULL	up
9.04_608.8019m/z	1.78887	0.0096436	0.0232306	0.658543	2.37227	CaseC:Control	NA	NULL	NA	NA	NA	NA	NA	NA	NA	NA	NA	NA	NA	NULL	up
9.07_325.2193m/z	1.5903	0.0161391	0.0146896	0.615581	1.78503	CaseC:Control	C15190	C15190	C22H30O2	M-H	37.6	0.0195	6.15631	94.8455	12alpha-Methylpregna-4,9(11)-diene-3,20-dione;	325.219	NA	9.06627	1	NULL	up
9.07_325.2193m/z	1.5903	0.0161391	0.0146896	0.615581	1.78503	CaseC:Control	C14208	C14208	C22H30O2	M-H	37.6	0	6.15631	94.8455	Promegestone;	325.219	NA	9.06627	1	NULL	up
9.07_393.1969m/z	1.2884	0.0199533	0.035463	0.74037	1.56799	CaseC:Control	NA	NULL	NA	NA	NA	NA	NA	NA	NA	NA	NA	NA	NA	NULL	up
9.08_716.0925m/z	1.40906	0.00931783	0.035463	0.74037	2.10098	CaseC:Control	NA	NULL	NA	NA	NA	NA	NA	NA	NA	NA	NA	NA	NA	NULL	up
9.09_337.2039m/z	1.2413	0.0415036	0.0630128	0.811589	1.52234	CaseC:Control	C20854	C20854	C19H30O5	M-H	36.3	12.4	5.38261	75.2665	Monacolin J acid;	337.204	NA	9.09483	1	NULL	up
9.09_337.2039m/z	1.2413	0.0415036	0.0630128	0.811589	1.52234	CaseC:Control	C18880	C18880	C19H30O5	M-H	36.2	12.1	5.38261	75.2665	Piperonyl butoxide;	337.204	NA	9.09483	1	NULL	up
9.09_337.2039m/z	1.2413	0.0415036	0.0630128	0.811589	1.52234	CaseC:Control	C09725	C09725	C19H30O5	M-H	36	11.1	5.38261	75.2665	Shiromodiol diacetate;	337.204	NA	9.09483	1	NULL	up
9.11_739.2716m/z	1.27376	0.0253686	0.0114962	0.593596	1.30146	CaseC:Control	NA	NULL	NA	NA	NA	NA	NA	NA	NA	NA	NA	NA	NA	NULL	up
9.14_440.3072m/z	1.3381	0.00116272	0.00388621	0.468207	2.24941	CaseC:Control	NA	NULL	NA	NA	NA	NA	NA	NA	NA	NA	NA	NA	NA	NULL	up
9.15_1082.6266m/z	1.46221	0.0228571	0.00684146	0.534651	1.52611	CaseC:Control	NA	NULL	NA	NA	NA	NA	NA	NA	NA	NA	NA	NA	NA	NULL	up
9.15_191.1804m/z	1.20876	0.0386155	0.0432571	0.762669	1.08611	CaseC:Control	NA	NULL	NA	NA	NA	NA	NA	NA	NA	NA	NA	NA	NA	NULL	up
9.15_249.1860m/z	1.24728	0.0265339	0.0432571	0.762669	1.24681	CaseC:Control	C11623	C11623	C14H22O.[C2H4O]n	M-H	22	10.2	-0.145538	NA	Triton X-100; alpha-(4-(1,1,3,3-Tetramethylbutyl)phenyl)-omega-hydroxypoly(oxy-1,2-ethanediyl);	249.186	NA	9.15198	1	NULL	up
9.15_249.1860m/z	1.24728	0.0265339	0.0432571	0.762669	1.24681	CaseC:Control	C16503	C16503	C16H26O2	M-H	41.2	10.6	-0.145538	95.7404	Methyl farnesoate; Methyl (2E,6E)-farnesoate;	249.186	NA	9.15198	1	map00981 Insect hormone biosynthesis	up
9.15_677.4542m/z	1.2864	0.0274087	0.0232306	0.658543	1.28289	CaseC:Control	NA	NULL	NA	NA	NA	NA	NA	NA	NA	NA	NA	NA	NA	NULL	up
9.15_738.3944m/z	1.28968	0.0144841	0.0114962	0.593596	1.43409	CaseC:Control	C15709	C15709	C39H61NO10	M+Cl	30.8	0	-6.41536	61.5	Spinosyn P;	738.394	NA	9.15198	1	NULL	up
9.15_745.4399m/z	1.2181	0.0343033	0.0432571	0.762669	1.14578	CaseC:Control	NA	NULL	NA	NA	NA	NA	NA	NA	NA	NA	NA	NA	NA	NULL	up
9.17_327.3340m/z	1.33887	0.0166781	0.0232306	0.658543	1.99888	CaseC:Control	NA	NULL	NA	NA	NA	NA	NA	NA	NA	NA	NA	NA	NA	NULL	up
9.19_417.3013m/z	1.43065	0.00588351	0.00684146	0.534651	1.67414	CaseC:Control	C15221	C15221	C26H42O4	M-H	37.3	1.03	0.537492	85.9462	Diisononyl phthalate;	417.301	NA	9.19483	1	NULL	up
9.19_784.2758m/z	0.783257	0.0226086	0.0146896	0.615581	1.54676	CaseC:Control	C16524	C16524	C40H47NO13	M+Cl	35.9	2.12	2.19305	79.9023	3'-N-Debenzoyltaxol; 13-O-3-Phenylisoserinoyl baccatin III;	784.276	NA	9.19483	1	map00904 Diterpenoid biosynthesis; map01100 Metabolic pathways; map01110 Biosynthesis of secondary metabolites	down
9.24_678.3704m/z	1.29286	0.00486959	0.0089307	0.586889	1.54704	CaseC:Control	NA	NULL	NA	NA	NA	NA	NA	NA	NA	NA	NA	NA	NA	NULL	up
9.24_887.4724m/z	1.23766	0.00528698	0.00388621	0.468207	1.58362	CaseC:Control	NA	NULL	NA	NA	NA	NA	NA	NA	NA	NA	NA	NA	NA	NULL	up
9.24_949.7197m/z	0.526537	0.0341003	0.0432571	0.762669	2.73056	CaseC:Control	NA	NULL	NA	NA	NA	NA	NA	NA	NA	NA	NA	NA	NA	NULL	down
9.25_479.0846m/z	1.57061	0.0406618	0.0630128	0.811589	1.84882	CaseC:Control	C17514	C17514	C21H20O13	M-H	37.9	0	3.0314	92.8996	4-o-Galloylbergenin;	479.085	NA	9.25198	1	NULL	up
9.25_479.0846m/z	1.57061	0.0406618	0.0630128	0.811589	1.84882	CaseC:Control	C17520	C17520	C21H20O13	M-H	37.9	0	3.0314	92.8996	11-o-Galloylbergenin;	479.085	NA	9.25198	1	NULL	up
9.25_479.0846m/z	1.57061	0.0406618	0.0630128	0.811589	1.84882	CaseC:Control	C10051	C10051	C21H20O13	M-H	37.9	0	3.0314	92.8996	Gossypin; Gossypetin 8-O-glucoside;	479.085	NA	9.25198	1	NULL	up
9.29_415.3208m/z	1.29089	0.0190437	0.0232306	0.658543	1.72242	CaseC:Control	C03963	C03963	C27H44O3	M-H	37.9	3.77	-2.28459	88.4954	Sarsasapogenin; (25S)-5beta-Spirostan-3beta-ol;	415.321	NA	9.287	1	NULL	up
9.29_415.3208m/z	1.29089	0.0190437	0.0232306	0.658543	1.72242	CaseC:Control	C08914	C08914	C27H44O3	M-H	37.9	3.77	-2.28459	88.4954	Tigogenin; 5-alpha-Spirostan-3-beta-ol;	415.321	NA	9.287	1	NULL	up
9.29_415.3208m/z	1.29089	0.0190437	0.0232306	0.658543	1.72242	CaseC:Control	C08913	C08913	C27H44O3	M-H	37.9	3.77	-2.28459	88.4954	Smilagenin; (25R)-5beta-Spirostan-3beta-ol;	415.321	NA	9.287	1	NULL	up
9.29_415.3208m/z	1.29089	0.0190437	0.0232306	0.658543	1.72242	CaseC:Control	C15633	C15633	C27H44O3	M-H	37.9	3.69	-2.28459	88.4954	5,6-24(S),25-Diepoxycholesterol; (24S,25)-Epoxycholesterol alpha-epoxide;	415.321	NA	9.287	1	NULL	up
9.29_415.3208m/z	1.29089	0.0190437	0.0232306	0.658543	1.72242	CaseC:Control	C16819	C16819	C27H44O3	M-H	37.9	3.77	-2.28459	88.4954	Neotigogenin;	415.321	NA	9.287	1	NULL	up
9.29_415.3208m/z	1.29089	0.0190437	0.0232306	0.658543	1.72242	CaseC:Control	C01673	C01673	C27H44O3	M-H	38	4.14	-2.28459	88.4954	Calcitriol; 1-alpha-25-Dihydroxyvitamin D3;	415.321	NA	9.287	1	map00100 Steroid biosynthesis; map01100 Metabolic pathways; map04961 Endocrine and other factor-regulated calcium reabsorption; map04978 Mineral absorption; map05152 Tuberculosis	up
9.29_415.3208m/z	1.29089	0.0190437	0.0232306	0.658543	1.72242	CaseC:Control	C19649	C19649	C27H44O3	M-H	37.9	3.81	-2.28459	88.4954	Pseudosarsasapogenin; (25S)-5beta-Furost-20(22)-ene-3beta,26-diol;	415.321	NA	9.287	1	NULL	up
9.29_415.3208m/z	1.29089	0.0190437	0.0232306	0.658543	1.72242	CaseC:Control	C19648	C19648	C27H44O3	M-H	37.9	3.81	-2.28459	88.4954	Pseudotigogenin; (25R)-5alpha-Furost-20(22)-ene-3beta,26-diol;	415.321	NA	9.287	1	NULL	up
9.29_415.3208m/z	1.29089	0.0190437	0.0232306	0.658543	1.72242	CaseC:Control	C19650	C19650	C27H44O3	M-H	37.9	3.81	-2.28459	88.4954	Pseudosmilagenin; (25R)-5beta-Furost-20(22)-ene-3beta,26-diol;	415.321	NA	9.287	1	NULL	up
9.29_415.3208m/z	1.29089	0.0190437	0.0232306	0.658543	1.72242	CaseC:Control	C08127	C08127	C27H44O3	M-H	38	4.14	-2.28459	88.4954	Paricalcitol; 19-Nor-1alpha,25-dihydroxyvitamin D2;	415.321	NA	9.287	1	NULL	up
9.29_415.3208m/z	1.29089	0.0190437	0.0232306	0.658543	1.72242	CaseC:Control	C12919	C12919	C27H44O3	M-H	38	4.14	-2.28459	88.4954	1-alpha,24(R)-Dihydroxyvitamin D3; Tacalcitol;	415.321	NA	9.287	1	NULL	up
9.29_415.3208m/z	1.29089	0.0190437	0.0232306	0.658543	1.72242	CaseC:Control	C07712	C07712	C27H44O3	M-H	37.2	0	-2.28459	88.4954	Secalciferol; 24(R),25-Dihydroxyvitamin D3;	415.321	NA	9.287	1	map00100 Steroid biosynthesis; map01100 Metabolic pathways	up
9.29_415.3208m/z	1.29089	0.0190437	0.0232306	0.658543	1.72242	CaseC:Control	C16493	C16493	C27H44O3	M-H	37.2	0	-2.28459	88.4954	3beta,5beta-Ketodiol; 2,22,25-Trideoxyecdysone; 3beta,14alpha-Dihydroxy-5beta-cholest-7-en-6-one;	415.321	NA	9.287	1	map00981 Insect hormone biosynthesis	up
9.29_415.3208m/z	1.29089	0.0190437	0.0232306	0.658543	1.72242	CaseC:Control	C17336	C17336	C27H44O3	M-H	38	4.14	-2.28459	88.4954	7alpha,26-Dihydroxy-4-cholesten-3-one;	415.321	NA	9.287	1	map00120 Primary bile acid biosynthesis	up
9.29_415.3208m/z	1.29089	0.0190437	0.0232306	0.658543	1.72242	CaseC:Control	C17333	C17333	C27H44O3	M-H	37.2	0	-2.28459	88.4954	3beta-Hydroxy-5-cholestenoate; 3beta-Hydroxycholest-5-en-27-oic acid;	415.321	NA	9.287	1	map00120 Primary bile acid biosynthesis	up
9.29_415.3208m/z	1.29089	0.0190437	0.0232306	0.658543	1.72242	CaseC:Control	C17332	C17332	C27H44O3	M-H	38	4.14	-2.28459	88.4954	7alpha,25-Dihydroxy-4-cholesten-3-one;	415.321	NA	9.287	1	map00120 Primary bile acid biosynthesis	up
9.29_415.3208m/z	1.29089	0.0190437	0.0232306	0.658543	1.72242	CaseC:Control	C17339	C17339	C27H44O3	M-H	37.2	0.322	-2.28459	88.4954	4-Cholesten-7alpha,12alpha-diol-3-one; 7alpha,12alpha-Dihydroxy-4-cholesten-3-one;	415.321	NA	9.287	1	map00120 Primary bile acid biosynthesis; map01100 Metabolic pathways	up
9.29_415.3208m/z	1.29089	0.0190437	0.0232306	0.658543	1.72242	CaseC:Control	C17331	C17331	C27H44O3	M-H	38	4.14	-2.28459	88.4954	7alpha,24-Dihydroxy-4-cholesten-3-one;	415.321	NA	9.287	1	map00120 Primary bile acid biosynthesis	up
9.32_311.2592m/z	1.3328	0.0341795	0.0288056	0.691214	1.92988	CaseC:Control	NA	NULL	NA	NA	NA	NA	NA	NA	NA	NA	NA	NA	NA	NULL	up
9.32_341.2481m/z	1.28847	0.0495326	0.0630128	0.811589	1.29908	CaseC:Control	NA	NULL	NA	NA	NA	NA	NA	NA	NA	NA	NA	NA	NA	NULL	up
9.34_872.2472m/z	1.42592	0.0408398	0.0524259	0.777382	2.1842	CaseC:Control	NA	NULL	NA	NA	NA	NA	NA	NA	NA	NA	NA	NA	NA	NULL	up
9.37_325.2748m/z	1.25695	0.0484973	0.0524259	0.777382	1.74634	CaseC:Control	C02117	C02117	C20H38O3	M-H	49.7	61.8	-0.107696	86.6615	2-Oxophytanate; 2-Oxophytanic acid;	325.275	NA	9.37272	1	NULL	up
9.39_588.8946m/z	1.73481	0.0469626	0.035463	0.74037	2.26193	CaseC:Control	NA	NULL	NA	NA	NA	NA	NA	NA	NA	NA	NA	NA	NA	NULL	up
9.46_301.2375m/z	1.31387	0.0296958	0.0892096	0.859831	1.7082	CaseC:Control	NA	NULL	NA	NA	NA	NA	NA	NA	NA	NA	NA	NA	NA	NULL	up
9.52_727.2959m/z	0.767466	0.0148517	0.0146896	0.615581	1.66405	CaseC:Control	NA	NULL	NA	NA	NA	NA	NA	NA	NA	NA	NA	NA	NA	NULL	down
9.54_1087.6606m/z	1.28526	0.0382899	0.0630128	0.811589	1.40451	CaseC:Control	NA	NULL	NA	NA	NA	NA	NA	NA	NA	NA	NA	NA	NA	NULL	up
9.56_517.3872m/z	1.607	0.000527	0.00150469	0.310772	3.07993	CaseC:Control	NA	NULL	NA	NA	NA	NA	NA	NA	NA	NA	NA	NA	NA	NULL	up
9.62_520.3751m/z	1.24813	0.0446288	0.0892096	0.859831	1.41022	CaseC:Control	NA	NULL	NA	NA	NA	NA	NA	NA	NA	NA	NA	NA	NA	NULL	up
9.84_333.2801m/z	0.377736	0.0364638	0.0524259	0.777382	2.41977	CaseC:Control	C16534	C16534	C22H38O2	M-H	37.3	0	0.59069	87.2055	13,16,19-Docosatrienoic acid; (13E,16E,19E)-Docosa-13,16,19-trienoic acid;	333.28	NA	9.84143	1	NULL	down
9.86_407.2952m/z	2.47519	0.0102501	0.00684146	0.534651	2.82496	CaseC:Control	NA	NULL	NA	NA	NA	NA	NA	NA	NA	NA	NA	NA	NA	NULL	up
9.89_687.2738m/z	0.773898	0.047325	0.14314	0.888175	1.69024	CaseC:Control	C08657	C08657	C35H44N2O10	M+Cl	37.7	3.25	7.42969	93.6089	Anhwiedelphinine;	687.274	NA	9.88525	1	NULL	down
